# Supplementary material
Source: publisher site journal article supplement (https://www.dovepress.com/get_supplementary_file.php?f=188364S3.xlsx)
Supplement: Supplementary file 1 [file get_supplementary_file.php]

## Sheet: Table S3
GO Term ID	GO Term	Level 1	Level 2	Term Candidate Gene Num	Total Candidate Gene Num	Term Gene Num	Total Gene Num	Rich Ratio	P value	Q value
GO:0006357	regulation of transcription from RNA polymerase II promoter	biological_process	biological regulation	177	1064	1317	14236	0.166353	1.48931e-15	1.20649e-11
GO:0048523	negative regulation of cellular process	biological_process	biological regulation	339	1064	3121	14236	0.318609	3.52794e-15	1.42899e-11
GO:0000122	negative regulation of transcription from RNA polymerase II promoter	biological_process	biological regulation	93	1064	535	14236	0.087406	7.34394e-15	1.98311e-11
GO:0050794	regulation of cellular process	biological_process	biological regulation	702	1064	7841	14236	0.659774	3.79709e-14	7.69005e-11
GO:0048519	negative regulation of biological process	biological_process	biological regulation	366	1064	3519	14236	0.343985	1.18664e-13	1.9226e-10
GO:0009966	regulation of signal transduction	biological_process	biological regulation	209	1064	1751	14236	0.196429	7.5838e-13	1.02394e-09
GO:0000981	RNA polymerase II transcription factor activity, sequence-specific DNA binding	molecular_function	transcription regulator activity	98	1178	645	16131	0.0831919	1.98648e-12	2.29892e-09
GO:0031324	negative regulation of cellular metabolic process	biological_process	biological regulation	196	1064	1632	14236	0.184211	2.70919e-12	2.7434e-09
GO:0051239	regulation of multicellular organismal process	biological_process	biological regulation	208	1064	1785	14236	0.195489	9.0833e-12	8.17598e-09
GO:0048522	positive regulation of cellular process	biological_process	biological regulation	329	1064	3192	14236	0.309211	1.5624e-11	1.2657e-08
GO:0001067	regulatory region nucleic acid binding	molecular_function	binding	115	1178	842	16131	0.0976231	2.75426e-11	1.31249e-08
GO:0003700	DNA binding transcription factor activity	molecular_function	transcription regulator activity	152	1178	1223	16131	0.129032	2.37204e-11	1.31249e-08
GO:0045892	negative regulation of transcription, DNA-templated	biological_process	biological regulation	118	1064	854	14236	0.110902	2.53548e-11	1.31249e-08
GO:0048583	regulation of response to stimulus	biological_process	biological regulation	251	1064	2290	14236	0.235902	2.62688e-11	1.31249e-08
GO:0051240	positive regulation of multicellular organismal process	biological_process	biological regulation	132	1064	990	14236	0.12406	1.85502e-11	1.31249e-08
GO:1902679	negative regulation of RNA biosynthetic process	biological_process	biological regulation	118	1064	854	14236	0.110902	2.53548e-11	1.31249e-08
GO:1903507	negative regulation of nucleic acid-templated transcription	biological_process	biological regulation	118	1064	854	14236	0.110902	2.53548e-11	1.31249e-08
GO:0051172	negative regulation of nitrogen compound metabolic process	biological_process	biological regulation	182	1064	1523	14236	0.171053	3.06146e-11	1.37783e-08
GO:0010646	regulation of cell communication	biological_process	biological regulation	222	1064	1977	14236	0.208647	5.71467e-11	2.43655e-08
GO:0048518	positive regulation of biological process	biological_process	biological regulation	356	1064	3561	14236	0.334586	8.33591e-11	3.37646e-08
GO:0044212	transcription regulatory region DNA binding	molecular_function	binding	113	1178	838	16131	0.0959253	9.23165e-11	3.56122e-08
GO:0023051	regulation of signaling	biological_process	biological regulation	222	1064	1989	14236	0.208647	1.02134e-10	3.76083e-08
GO:0050789	regulation of biological process	biological_process	biological regulation	719	1064	8320	14236	0.675752	1.23215e-10	4.33984e-08
GO:0051253	negative regulation of RNA metabolic process	biological_process	biological regulation	120	1064	896	14236	0.112782	1.29381e-10	4.36713e-08
GO:0010558	negative regulation of macromolecule biosynthetic process	biological_process	biological regulation	131	1064	1010	14236	0.12312	1.49217e-10	4.83524e-08
GO:0006355	regulation of transcription, DNA-templated	biological_process	biological regulation	308	1064	3005	14236	0.289474	2.00347e-10	6.01115e-08
GO:1903506	regulation of nucleic acid-templated transcription	biological_process	biological regulation	308	1064	3005	14236	0.289474	2.00347e-10	6.01115e-08
GO:2001141	regulation of RNA biosynthetic process	biological_process	biological regulation	308	1064	3010	14236	0.289474	2.4359e-10	7.04757e-08
GO:0051252	regulation of RNA metabolic process	biological_process	biological regulation	315	1064	3100	14236	0.296053	3.09445e-10	8.64419e-08
GO:0045934	negative regulation of nucleobase-containing compound metabolic process	biological_process	biological regulation	128	1064	993	14236	0.120301	3.7443e-10	9.78469e-08
GO:0045936	negative regulation of phosphate metabolic process	biological_process	biological regulation	63	1064	368	14236	0.0592105	3.71965e-10	9.78469e-08
GO:0000976	transcription regulatory region sequence-specific DNA binding	molecular_function	binding	95	1178	678	16131	0.0806452	4.21976e-10	9.791e-08
GO:0010563	negative regulation of phosphorus metabolic process	biological_process	biological regulation	63	1064	369	14236	0.0592105	4.16967e-10	9.791e-08
GO:0031323	regulation of cellular metabolic process	biological_process	biological regulation	436	1064	4600	14236	0.409774	4.12022e-10	9.791e-08
GO:0031327	negative regulation of cellular biosynthetic process	biological_process	biological regulation	134	1064	1057	14236	0.12594	4.23016e-10	9.791e-08
GO:0000982	transcription factor activity, RNA polymerase II proximal promoter sequence-specific DNA binding	molecular_function	transcription regulator activity	59	1178	342	16131	0.0500849	4.43438e-10	9.97858e-08
GO:0009890	negative regulation of biosynthetic process	biological_process	biological regulation	135	1064	1070	14236	0.12688	4.97985e-10	1.09032e-07
GO:0065007	biological regulation	biological_process	biological regulation	752	1064	8837	14236	0.706767	6.17223e-10	1.31582e-07
GO:0043565	sequence-specific DNA binding	molecular_function	binding	131	1178	1054	16131	0.111205	6.76337e-10	1.40487e-07
GO:2000113	negative regulation of cellular macromolecule biosynthetic process	biological_process	biological regulation	126	1064	982	14236	0.118421	7.03112e-10	1.42398e-07
GO:1990837	sequence-specific double-stranded DNA binding	molecular_function	binding	97	1178	709	16131	0.082343	1.00214e-09	1.98008e-07
GO:0051254	positive regulation of RNA metabolic process	biological_process	biological regulation	135	1064	1085	14236	0.12688	1.25847e-09	2.42734e-07
GO:0042325	regulation of phosphorylation	biological_process	biological regulation	126	1064	993	14236	0.118421	1.4259e-09	2.68632e-07
GO:0009892	negative regulation of metabolic process	biological_process	biological regulation	206	1064	1867	14236	0.193609	1.61994e-09	2.98252e-07
GO:0042326	negative regulation of phosphorylation	biological_process	biological regulation	50	1064	270	14236	0.0469925	1.66768e-09	3.0022e-07
GO:0019220	regulation of phosphate metabolic process	biological_process	biological regulation	142	1064	1165	14236	0.133459	1.79624e-09	3.16334e-07
GO:0051174	regulation of phosphorus metabolic process	biological_process	biological regulation	143	1064	1178	14236	0.134398	2.05741e-09	3.54618e-07
GO:2000112	regulation of cellular macromolecule biosynthetic process	biological_process	biological regulation	326	1064	3286	14236	0.306391	2.19978e-09	3.71259e-07
GO:0000977	RNA polymerase II regulatory region sequence-specific DNA binding	molecular_function	binding	84	1178	591	16131	0.0713073	2.29706e-09	3.79765e-07
GO:0010556	regulation of macromolecule biosynthetic process	biological_process	biological regulation	331	1064	3352	14236	0.31109	2.6425e-09	4.10549e-07
GO:0045893	positive regulation of transcription, DNA-templated	biological_process	biological regulation	132	1064	1066	14236	0.12406	2.68598e-09	4.10549e-07
GO:1902680	positive regulation of RNA biosynthetic process	biological_process	biological regulation	132	1064	1066	14236	0.12406	2.68598e-09	4.10549e-07
GO:1903508	positive regulation of nucleic acid-templated transcription	biological_process	biological regulation	132	1064	1066	14236	0.12406	2.68598e-09	4.10549e-07
GO:0001012	RNA polymerase II regulatory region DNA binding	molecular_function	binding	84	1178	596	16131	0.0713073	3.44544e-09	5.1688e-07
GO:0042221	response to chemical	biological_process	response to stimulus	290	1064	2866	14236	0.272556	3.63498e-09	5.354e-07
GO:2000145	regulation of cell motility	biological_process	biological regulation	69	1064	444	14236	0.0648496	3.85882e-09	5.5822e-07
GO:0040012	regulation of locomotion	biological_process	biological regulation	72	1064	472	14236	0.0676692	3.96423e-09	5.63407e-07
GO:0045944	positive regulation of transcription from RNA polymerase II promoter	biological_process	biological regulation	101	1064	754	14236	0.0949248	4.28495e-09	5.98489e-07
GO:0019219	regulation of nucleobase-containing compound metabolic process	biological_process	biological regulation	332	1064	3379	14236	0.31203	4.41835e-09	6.06662e-07
GO:0003690	double-stranded DNA binding	molecular_function	binding	103	1178	791	16131	0.0874363	4.57837e-09	6.18156e-07
GO:0051270	regulation of cellular component movement	biological_process	biological regulation	72	1064	476	14236	0.0676692	5.71858e-09	7.59446e-07
GO:0030334	regulation of cell migration	biological_process	biological regulation	66	1064	421	14236	0.0620301	5.94672e-09	7.77006e-07
GO:0080090	regulation of primary metabolic process	biological_process	biological regulation	422	1064	4509	14236	0.396617	6.32962e-09	8.13909e-07
GO:0051171	regulation of nitrogen compound metabolic process	biological_process	biological regulation	415	1064	4423	14236	0.390038	6.8216e-09	8.50181e-07
GO:2000026	regulation of multicellular organismal development	biological_process	biological regulation	137	1064	1135	14236	0.128759	6.8078e-09	8.50181e-07
GO:0009605	response to external stimulus	biological_process	response to stimulus	164	1064	1431	14236	0.154135	7.94097e-09	9.74694e-07
GO:1902531	regulation of intracellular signal transduction	biological_process	biological regulation	126	1064	1022	14236	0.118421	8.43827e-09	1.02027e-06
GO:0010628	positive regulation of gene expression	biological_process	biological regulation	146	1064	1238	14236	0.137218	9.58169e-09	1.14141e-06
GO:0031326	regulation of cellular biosynthetic process	biological_process	biological regulation	339	1064	3488	14236	0.318609	9.72194e-09	1.14141e-06
GO:0010605	negative regulation of macromolecule metabolic process	biological_process	biological regulation	187	1064	1698	14236	0.175752	1.30172e-08	1.4901e-06
GO:0050793	regulation of developmental process	biological_process	biological regulation	173	1064	1541	14236	0.162594	1.30598e-08	1.4901e-06
GO:0003677	DNA binding	molecular_function	binding	250	1178	2473	16131	0.212224	1.36471e-08	1.53549e-06
GO:0001932	regulation of protein phosphorylation	biological_process	biological regulation	116	1064	927	14236	0.109023	1.53057e-08	1.69851e-06
GO:0010033	response to organic substance	biological_process	response to stimulus	209	1064	1955	14236	0.196429	1.71879e-08	1.88161e-06
GO:0002682	regulation of immune system process	biological_process	biological regulation	112	1064	888	14236	0.105263	1.80246e-08	1.9469e-06
GO:0009889	regulation of biosynthetic process	biological_process	biological regulation	339	1064	3521	14236	0.318609	2.85022e-08	3.03811e-06
GO:0045595	regulation of cell differentiation	biological_process	biological regulation	124	1064	1024	14236	0.116541	3.22898e-08	3.39346e-06
GO:0051241	negative regulation of multicellular organismal process	biological_process	biological regulation	97	1064	743	14236	0.0911654	3.26738e-08	3.39346e-06
GO:0031399	regulation of protein modification process	biological_process	biological regulation	137	1064	1165	14236	0.128759	3.50466e-08	3.59383e-06
GO:0007154	cell communication	biological_process	cellular process	357	1064	3751	14236	0.335526	3.60277e-08	3.64825e-06
GO:0048585	negative regulation of response to stimulus	biological_process	biological regulation	111	1064	893	14236	0.104323	4.62793e-08	4.6285e-06
GO:0007166	cell surface receptor signaling pathway	biological_process	biological regulation	167	1064	1504	14236	0.156955	5.29928e-08	5.2353e-06
GO:0010557	positive regulation of macromolecule biosynthetic process	biological_process	biological regulation	142	1064	1229	14236	0.133459	5.75888e-08	5.6208e-06
GO:0001227	transcriptional repressor activity, RNA polymerase II transcription regulatory region sequence-specific DNA binding	molecular_function	transcription regulator activity	34	1178	170	16131	0.0288625	5.90069e-08	5.69066e-06
GO:0045935	positive regulation of nucleobase-containing compound metabolic process	biological_process	biological regulation	147	1064	1287	14236	0.138158	6.74153e-08	6.42507e-06
GO:0010604	positive regulation of macromolecule metabolic process	biological_process	biological regulation	215	1064	2060	14236	0.202068	7.25203e-08	6.83124e-06
GO:0019222	regulation of metabolic process	biological_process	biological regulation	445	1064	4890	14236	0.418233	8.25462e-08	7.68628e-06
GO:0009893	positive regulation of metabolic process	biological_process	biological regulation	228	1064	2218	14236	0.214286	9.13224e-08	8.40685e-06
GO:0010468	regulation of gene expression	biological_process	biological regulation	340	1064	3573	14236	0.319549	9.84532e-08	8.8876e-06
GO:0050865	regulation of cell activation	biological_process	biological regulation	58	1064	377	14236	0.0545113	9.87389e-08	8.8876e-06
GO:0060255	regulation of macromolecule metabolic process	biological_process	biological regulation	419	1064	4569	14236	0.393797	1.12028e-07	9.97299e-06
GO:0009653	anatomical structure morphogenesis	biological_process	developmental process	184	1064	1715	14236	0.172932	1.19849e-07	1.05532e-05
GO:0031328	positive regulation of cellular biosynthetic process	biological_process	biological regulation	149	1064	1324	14236	0.140038	1.38107e-07	1.20302e-05
GO:0070887	cellular response to chemical stimulus	biological_process	cellular process	187	1064	1759	14236	0.175752	1.78352e-07	1.53706e-05
GO:0000978	RNA polymerase II proximal promoter sequence-specific DNA binding	molecular_function	binding	54	1178	355	16131	0.0458404	1.9885e-07	1.67801e-05
GO:0001933	negative regulation of protein phosphorylation	biological_process	biological regulation	42	1064	241	14236	0.0394737	1.97253e-07	1.67801e-05
GO:0051094	positive regulation of developmental process	biological_process	biological regulation	101	1064	814	14236	0.0949248	2.14153e-07	1.78851e-05
GO:0001228	transcriptional activator activity, RNA polymerase II transcription regulatory region sequence-specific DNA binding	molecular_function	transcription regulator activity	51	1178	328	16131	0.0432937	2.16557e-07	1.79013e-05
GO:0000987	proximal promoter sequence-specific DNA binding	molecular_function	binding	56	1178	375	16131	0.0475382	2.21553e-07	1.81293e-05
GO:0031325	positive regulation of cellular metabolic process	biological_process	biological regulation	217	1064	2115	14236	0.203947	2.40724e-07	1.95011e-05
GO:0001817	regulation of cytokine production	biological_process	biological regulation	60	1064	406	14236	0.056391	2.50615e-07	2.00381e-05
GO:0051173	positive regulation of nitrogen compound metabolic process	biological_process	biological regulation	211	1064	2046	14236	0.198308	2.523e-07	2.00381e-05
GO:0031400	negative regulation of protein modification process	biological_process	biological regulation	56	1064	370	14236	0.0526316	2.85838e-07	2.24813e-05
GO:0001944	vasculature development	biological_process	multicellular organismal process	60	1064	408	14236	0.056391	2.97749e-07	2.3193e-05
GO:0009891	positive regulation of biosynthetic process	biological_process	biological regulation	149	1064	1345	14236	0.140038	3.63768e-07	2.80656e-05
GO:1901363	heterocyclic compound binding	molecular_function	binding	467	1178	5323	16131	0.396435	3.89729e-07	2.97848e-05
GO:0048856	anatomical structure development	biological_process	developmental process	370	1064	3995	14236	0.347744	3.97928e-07	3.01272e-05
GO:0072358	cardiovascular system development	biological_process	multicellular organismal process	60	1064	412	14236	0.056391	4.18165e-07	3.13662e-05
GO:0097159	organic cyclic compound binding	molecular_function	binding	473	1178	5406	16131	0.401528	4.32595e-07	3.21509e-05
GO:0010648	negative regulation of cell communication	biological_process	biological regulation	97	1064	788	14236	0.0911654	5.47075e-07	4.02896e-05
GO:0002694	regulation of leukocyte activation	biological_process	biological regulation	53	1064	350	14236	0.049812	5.85718e-07	4.27468e-05
GO:0023057	negative regulation of signaling	biological_process	biological regulation	97	1064	790	14236	0.0911654	6.14614e-07	4.44552e-05
GO:0007275	multicellular organism development	biological_process	multicellular organismal process	351	1064	3773	14236	0.329887	6.24085e-07	4.47408e-05
GO:0023052	signaling	biological_process	signaling	341	1064	3658	14236	0.320489	8.22288e-07	5.8433e-05
GO:0002683	negative regulation of immune system process	biological_process	biological regulation	42	1064	254	14236	0.0394737	8.52477e-07	6.00514e-05
GO:0009968	negative regulation of signal transduction	biological_process	biological regulation	89	1064	714	14236	0.0836466	9.66646e-07	6.75069e-05
GO:0010629	negative regulation of gene expression	biological_process	biological regulation	133	1064	1189	14236	0.125	9.98517e-07	6.91367e-05
GO:0042127	regulation of cell proliferation	biological_process	biological regulation	137	1064	1237	14236	0.128759	1.17056e-06	8.03621e-05
GO:0032502	developmental process	biological_process	developmental process	383	1064	4203	14236	0.359962	1.30659e-06	8.89467e-05
GO:0007165	signal transduction	biological_process	biological regulation	311	1064	3307	14236	0.292293	1.50918e-06	0.000101655
GO:0009967	positive regulation of signal transduction	biological_process	biological regulation	103	1064	870	14236	0.0968045	1.51836e-06	0.000101655
GO:0016773	phosphotransferase activity, alcohol group as acceptor	molecular_function	catalytic activity	93	1178	782	16131	0.0789474	1.71422e-06	0.000113827
GO:0002684	positive regulation of immune system process	biological_process	biological regulation	76	1064	590	14236	0.0714286	1.80609e-06	0.000118952
GO:0045597	positive regulation of cell differentiation	biological_process	biological regulation	74	1064	571	14236	0.0695489	1.97523e-06	0.000129043
GO:0043549	regulation of kinase activity	biological_process	biological regulation	83	1064	666	14236	0.0780075	2.29737e-06	0.000148888
GO:0016477	cell migration	biological_process	cellular process	76	1064	594	14236	0.0714286	2.33479e-06	0.000150112
GO:0050896	response to stimulus	biological_process	response to stimulus	516	1064	5947	14236	0.484962	2.48767e-06	0.000158682
GO:0051716	cellular response to stimulus	biological_process	cellular process	391	1064	4333	14236	0.367481	2.70995e-06	0.00017151
GO:0051246	regulation of protein metabolic process	biological_process	biological regulation	182	1064	1777	14236	0.171053	3.25296e-06	0.000204281
GO:0001568	blood vessel development	biological_process	multicellular organismal process	54	1064	380	14236	0.0507519	3.37178e-06	0.000210114
GO:0008285	negative regulation of cell proliferation	biological_process	biological regulation	70	1064	540	14236	0.0657895	3.72145e-06	0.000230133
GO:0016301	kinase activity	molecular_function	catalytic activity	105	1178	929	16131	0.0891341	3.85703e-06	0.000236711
GO:0045859	regulation of protein kinase activity	biological_process	biological regulation	79	1064	634	14236	0.0742481	4.08066e-06	0.000248552
GO:0071310	cellular response to organic substance	biological_process	cellular process	148	1064	1393	14236	0.139098	4.49285e-06	0.000271616
GO:1901700	response to oxygen-containing compound	biological_process	response to stimulus	112	1064	990	14236	0.105263	4.62038e-06	0.000277257
GO:0048731	system development	biological_process	multicellular organismal process	299	1064	3201	14236	0.281015	4.91344e-06	0.000292675
GO:0003676	nucleic acid binding	molecular_function	binding	300	1178	3277	16131	0.254669	5.00525e-06	0.000295968
GO:0032268	regulation of cellular protein metabolic process	biological_process	biological regulation	168	1064	1636	14236	0.157895	7.2095e-06	0.000423219
GO:0001819	positive regulation of cytokine production	biological_process	biological regulation	41	1064	267	14236	0.0385338	7.75001e-06	0.000448449
GO:0040011	locomotion	biological_process	locomotion	112	1064	1001	14236	0.105263	7.69828e-06	0.000448449
GO:0048584	positive regulation of response to stimulus	biological_process	biological regulation	132	1064	1226	14236	0.12406	8.14858e-06	0.000468168
GO:0010647	positive regulation of cell communication	biological_process	biological regulation	107	1064	949	14236	0.100564	8.89972e-06	0.000507723
GO:0050867	positive regulation of cell activation	biological_process	biological regulation	39	1064	251	14236	0.0366541	9.68309e-06	0.000548551
GO:0001077	transcriptional activator activity, RNA polymerase II proximal promoter sequence-specific DNA binding	molecular_function	transcription regulator activity	37	1178	238	16131	0.0314092	9.82724e-06	0.00055285
GO:0048729	tissue morphogenesis	biological_process	developmental process	63	1064	486	14236	0.0592105	1.14101e-05	0.000637473
GO:0048646	anatomical structure formation involved in morphogenesis	biological_process	developmental process	79	1064	652	14236	0.0742481	1.15681e-05	0.000641872
GO:0023056	positive regulation of signaling	biological_process	biological regulation	107	1064	955	14236	0.100564	1.17433e-05	0.000647159
GO:0001818	negative regulation of cytokine production	biological_process	biological regulation	29	1064	165	14236	0.0272556	1.26322e-05	0.000691441
GO:0042060	wound healing	biological_process	response to stimulus	71	1064	570	14236	0.0667293	1.2801e-05	0.000695978
GO:0010941	regulation of cell death	biological_process	biological regulation	121	1064	1115	14236	0.113722	1.39923e-05	0.000755676
GO:0048870	cell motility	biological_process	cellular process	79	1064	657	14236	0.0742481	1.5261e-05	0.000813352
GO:0051674	localization of cell	biological_process	localization	79	1064	657	14236	0.0742481	1.5261e-05	0.000813352
GO:0072359	circulatory system development	biological_process	multicellular organismal process	80	1064	669	14236	0.075188	1.64624e-05	0.000871647
GO:0022603	regulation of anatomical structure morphogenesis	biological_process	biological regulation	73	1064	596	14236	0.068609	1.72932e-05	0.000909691
GO:0008134	transcription factor binding	molecular_function	binding	68	1178	557	16131	0.057725	1.87396e-05	0.000979417
GO:0002009	morphogenesis of an epithelium	biological_process	developmental process	54	1064	403	14236	0.0507519	1.90005e-05	0.000986686
GO:0002696	positive regulation of leukocyte activation	biological_process	biological regulation	37	1064	240	14236	0.0347744	1.94241e-05	0.00100226
GO:0032501	multicellular organismal process	biological_process	multicellular organismal process	443	1064	5089	14236	0.416353	2.1093e-05	0.00108149
GO:0009888	tissue development	biological_process	developmental process	132	1064	1250	14236	0.12406	2.12501e-05	0.00108268
GO:0032879	regulation of localization	biological_process	biological regulation	146	1064	1412	14236	0.137218	2.22101e-05	0.00112452
GO:0005622	intracellular	cellular_component	cell	1028	1230	13708	17330	0.835772	2.34292e-05	0.00117603
GO:0051248	negative regulation of protein metabolic process	biological_process	biological regulation	79	1064	665	14236	0.0742481	2.35177e-05	0.00117603
GO:0031668	cellular response to extracellular stimulus	biological_process	cellular process	19	1064	89	14236	0.0178571	2.50249e-05	0.00124372
GO:0001078	transcriptional repressor activity, RNA polymerase II proximal promoter sequence-specific DNA binding	molecular_function	transcription regulator activity	21	1178	107	16131	0.0178268	2.62469e-05	0.0012965
GO:0070372	regulation of ERK1 and ERK2 cascade	biological_process	biological regulation	23	1064	121	14236	0.0216165	2.71666e-05	0.0013338
GO:1903706	regulation of hemopoiesis	biological_process	biological regulation	36	1064	235	14236	0.0338346	2.87987e-05	0.00140541
GO:0032763	regulation of mast cell cytokine production	biological_process	biological regulation	4	1064	4	14236	0.0037594	3.10417e-05	0.00149697
GO:0043067	regulation of programmed cell death	biological_process	biological regulation	116	1064	1078	14236	0.109023	3.11194e-05	0.00149697
GO:0071496	cellular response to external stimulus	biological_process	response to stimulus	26	1064	147	14236	0.0244361	3.12292e-05	0.00149697
GO:0000989	transcription factor activity, transcription factor binding	molecular_function	transcription regulator activity	71	1178	599	16131	0.0602716	3.28696e-05	0.00156633
GO:0007179	transforming growth factor beta receptor signaling pathway	biological_process	biological regulation	18	1064	84	14236	0.0169173	3.85176e-05	0.00182475
GO:0000988	transcription factor activity, protein binding	molecular_function	transcription regulator activity	71	1178	603	16131	0.0602716	4.07948e-05	0.00192139
GO:0050730	regulation of peptidyl-tyrosine phosphorylation	biological_process	biological regulation	23	1064	125	14236	0.0216165	4.64668e-05	0.00217588
GO:0042981	regulation of apoptotic process	biological_process	biological regulation	114	1064	1066	14236	0.107143	4.7767e-05	0.00222391
GO:0048513	animal organ development	biological_process	multicellular organismal process	215	1064	2255	14236	0.202068	4.83438e-05	0.00223791
GO:0060429	epithelium development	biological_process	developmental process	88	1064	778	14236	0.0827068	5.14715e-05	0.00236915
GO:0080134	regulation of response to stress	biological_process	biological regulation	84	1064	735	14236	0.0789474	5.31691e-05	0.00243346
GO:0050766	positive regulation of phagocytosis	biological_process	biological regulation	10	1064	31	14236	0.0093985	5.41086e-05	0.00246255
GO:0030154	cell differentiation	biological_process	cellular process	230	1064	2444	14236	0.216165	5.77508e-05	0.00261363
GO:0032844	regulation of homeostatic process	biological_process	biological regulation	38	1064	262	14236	0.0357143	5.97408e-05	0.00268867
GO:0032269	negative regulation of cellular protein metabolic process	biological_process	biological regulation	73	1064	619	14236	0.068609	6.09666e-05	0.00272868
GO:0004672	protein kinase activity	molecular_function	catalytic activity	75	1178	655	16131	0.0636672	6.31199e-05	0.00280953
GO:0071901	negative regulation of protein serine/threonine kinase activity	biological_process	biological regulation	19	1064	95	14236	0.0178571	6.48143e-05	0.00286918
GO:0006935	chemotaxis	biological_process	response to stimulus	67	1064	558	14236	0.0629699	7.09391e-05	0.00310637
GO:0042330	taxis	biological_process	response to stimulus	67	1064	558	14236	0.0629699	7.09391e-05	0.00310637
GO:0006928	movement of cell or subcellular component	biological_process	cellular process	120	1064	1146	14236	0.112782	7.52749e-05	0.00327851
GO:0042327	positive regulation of phosphorylation	biological_process	biological regulation	77	1064	667	14236	0.0723684	7.84716e-05	0.00339946
GO:0048869	cellular developmental process	biological_process	cellular process	234	1064	2505	14236	0.219925	7.93849e-05	0.00342073
GO:0033673	negative regulation of kinase activity	biological_process	biological regulation	28	1064	173	14236	0.0263158	8.18687e-05	0.00349062
GO:0051338	regulation of transferase activity	biological_process	biological regulation	86	1064	766	14236	0.0808271	8.1609e-05	0.00349062
GO:0003714	transcription corepressor activity	molecular_function	transcription regulator activity	33	1178	224	16131	0.0280136	8.6607e-05	0.00367332
GO:0045926	negative regulation of growth	biological_process	biological regulation	32	1064	210	14236	0.0300752	8.70838e-05	0.0036743
GO:0098552	side of membrane	cellular_component	membrane part	52	1230	426	17330	0.0422764	8.80817e-05	0.00369715
GO:0033993	response to lipid	biological_process	response to stimulus	68	1064	573	14236	0.0639098	8.98263e-05	0.00375094
GO:0051249	regulation of lymphocyte activation	biological_process	biological regulation	42	1064	306	14236	0.0394737	9.10735e-05	0.00378352
GO:0009611	response to wounding	biological_process	response to stimulus	74	1064	639	14236	0.0695489	9.77518e-05	0.00401973
GO:0009790	embryo development	biological_process	multicellular organismal process	101	1064	937	14236	0.0949248	9.75627e-05	0.00401973
GO:1902533	positive regulation of intracellular signal transduction	biological_process	biological regulation	72	1064	618	14236	0.0676692	0.000100535	0.00411332
GO:0030097	hemopoiesis	biological_process	multicellular organismal process	49	1064	378	14236	0.0460526	0.000105906	0.00431127
GO:0090196	regulation of chemokine secretion	biological_process	biological regulation	5	1064	8	14236	0.00469925	0.000106887	0.00432944
GO:0006950	response to stress	biological_process	response to stimulus	250	1064	2717	14236	0.234962	0.000115967	0.00465074
GO:0071900	regulation of protein serine/threonine kinase activity	biological_process	biological regulation	52	1064	410	14236	0.0488722	0.000115947	0.00465074
GO:0050764	regulation of phagocytosis	biological_process	biological regulation	11	1064	40	14236	0.0103383	0.000118448	0.00472683
GO:0002521	leukocyte differentiation	biological_process	cellular process	33	1064	223	14236	0.031015	0.000121158	0.0048113
GO:0043409	negative regulation of MAPK cascade	biological_process	biological regulation	20	1064	108	14236	0.018797	0.000129809	0.00512969
GO:0040013	negative regulation of locomotion	biological_process	biological regulation	25	1064	151	14236	0.0234962	0.000133613	0.00522896
GO:0042289	MHC class II protein binding	molecular_function	binding	4	1178	5	16131	0.00339559	0.000133289	0.00522896
GO:0030336	negative regulation of cell migration	biological_process	biological regulation	23	1064	134	14236	0.0216165	0.000140543	0.00545993
GO:0070888	E-box binding	molecular_function	binding	10	1178	35	16131	0.00848896	0.000140862	0.00545993
GO:0034097	response to cytokine	biological_process	response to stimulus	56	1064	455	14236	0.0526316	0.000144209	0.00556305
GO:0060326	cell chemotaxis	biological_process	cellular process	20	1064	109	14236	0.018797	0.000148025	0.00568317
GO:0016772	transferase activity, transferring phosphorus-containing groups	molecular_function	catalytic activity	110	1178	1075	16131	0.0933786	0.000163399	0.00624385
GO:0007178	transmembrane receptor protein serine/threonine kinase signaling pathway	biological_process	biological regulation	25	1064	153	14236	0.0234962	0.000165531	0.00629561
GO:0010942	positive regulation of cell death	biological_process	biological regulation	48	1064	375	14236	0.0451128	0.000168451	0.00637674
GO:0051056	regulation of small GTPase mediated signal transduction	biological_process	biological regulation	33	1064	227	14236	0.031015	0.000170737	0.00643321
GO:0019955	cytokine binding	molecular_function	binding	18	1178	96	16131	0.0152801	0.000178273	0.00668606
GO:0001934	positive regulation of protein phosphorylation	biological_process	biological regulation	73	1064	641	14236	0.068609	0.000182813	0.00682474
GO:0000302	response to reactive oxygen species	biological_process	response to stimulus	20	1064	111	14236	0.018797	0.000191327	0.00707734
GO:0071560	cellular response to transforming growth factor beta stimulus	biological_process	cellular process	20	1064	111	14236	0.018797	0.000191327	0.00707734
GO:0001046	core promoter sequence-specific DNA binding	molecular_function	binding	19	1178	105	16131	0.016129	0.000193917	0.00714055
GO:0005634	nucleus	cellular_component	cell	546	1230	6856	17330	0.443902	0.000196624	0.00720746
GO:2000146	negative regulation of cell motility	biological_process	biological regulation	23	1064	137	14236	0.0216165	0.000197577	0.00720979
GO:0050776	regulation of immune response	biological_process	biological regulation	66	1064	567	14236	0.0620301	0.000199519	0.00724799
GO:0048534	hematopoietic or lymphoid organ development	biological_process	multicellular organismal process	52	1064	419	14236	0.0488722	0.000200563	0.00725338
GO:0051251	positive regulation of lymphocyte activation	biological_process	biological regulation	32	1064	220	14236	0.0300752	0.000210693	0.00758587
GO:0009887	animal organ morphogenesis	biological_process	multicellular organismal process	86	1064	788	14236	0.0808271	0.000215203	0.00768
GO:0051272	positive regulation of cellular component movement	biological_process	biological regulation	35	1064	249	14236	0.0328947	0.000214875	0.00768
GO:0071559	response to transforming growth factor beta	biological_process	response to stimulus	20	1064	112	14236	0.018797	0.000216882	0.00770597
GO:0010562	positive regulation of phosphorus metabolic process	biological_process	biological regulation	83	1064	755	14236	0.0780075	0.000218854	0.00770844
GO:0045937	positive regulation of phosphate metabolic process	biological_process	biological regulation	83	1064	755	14236	0.0780075	0.000218854	0.00770844
GO:0032403	protein complex binding	molecular_function	binding	81	1178	749	16131	0.0687606	0.000220938	0.00774814
GO:1905476	negative regulation of protein localization to membrane	biological_process	biological regulation	5	1064	9	14236	0.00469925	0.000225664	0.00787977
GO:0035295	tube development	biological_process	multicellular organismal process	62	1064	528	14236	0.0582707	0.000243786	0.008476
GO:1902532	negative regulation of intracellular signal transduction	biological_process	biological regulation	34	1064	241	14236	0.0319549	0.000245093	0.00848503
GO:0043068	positive regulation of programmed cell death	biological_process	biological regulation	46	1064	361	14236	0.0432331	0.000253389	0.00873492
GO:0003712	transcription cofactor activity	molecular_function	transcription regulator activity	63	1178	552	16131	0.0534805	0.000262533	0.00901177
GO:0051271	negative regulation of cellular component movement	biological_process	biological regulation	24	1064	149	14236	0.0225564	0.00027684	0.0094628
GO:0032845	negative regulation of homeostatic process	biological_process	biological regulation	16	1064	81	14236	0.0150376	0.000278311	0.00947309
GO:1903708	positive regulation of hemopoiesis	biological_process	biological regulation	21	1064	123	14236	0.0197368	0.000290589	0.00984964
GO:0097529	myeloid leukocyte migration	biological_process	cellular process	14	1064	66	14236	0.0131579	0.000305641	0.0103167
GO:0007167	enzyme linked receptor protein signaling pathway	biological_process	biological regulation	76	1064	686	14236	0.0714286	0.000318199	0.010696
GO:0009898	cytoplasmic side of plasma membrane	cellular_component	cell	25	1230	168	17330	0.0203252	0.00033679	0.0112741
GO:0051247	positive regulation of protein metabolic process	biological_process	biological regulation	111	1064	1084	14236	0.104323	0.000338261	0.0112768
GO:0009628	response to abiotic stimulus	biological_process	response to stimulus	85	1064	788	14236	0.0798872	0.00034276	0.0113799
GO:0048514	blood vessel morphogenesis	biological_process	multicellular organismal process	41	1064	315	14236	0.0385338	0.000346362	0.0114526
GO:0010035	response to inorganic substance	biological_process	response to stimulus	40	1064	305	14236	0.037594	0.000348238	0.0114678
GO:0031347	regulation of defense response	biological_process	biological regulation	52	1064	429	14236	0.0488722	0.000357197	0.0116679
GO:1901342	regulation of vasculature development	biological_process	biological regulation	27	1064	179	14236	0.0253759	0.000356096	0.0116679
GO:0019899	enzyme binding	molecular_function	binding	169	1178	1811	16131	0.143463	0.000375266	0.0122089
GO:0043069	negative regulation of programmed cell death	biological_process	biological regulation	73	1064	657	14236	0.068609	0.000382167	0.0123838
GO:0051093	negative regulation of developmental process	biological_process	biological regulation	67	1064	592	14236	0.0629699	0.000397528	0.0128302
GO:0006469	negative regulation of protein kinase activity	biological_process	biological regulation	25	1064	162	14236	0.0234962	0.000408731	0.0131394
GO:0030335	positive regulation of cell migration	biological_process	biological regulation	33	1064	238	14236	0.031015	0.000413198	0.0131784
GO:0060394	negative regulation of pathway-restricted SMAD protein phosphorylation	biological_process	biological regulation	4	1064	6	14236	0.0037594	0.000411859	0.0131784
GO:0060548	negative regulation of cell death	biological_process	biological regulation	75	1064	681	14236	0.0704887	0.000415125	0.013188
GO:1901722	regulation of cell proliferation involved in kidney development	biological_process	biological regulation	5	1064	10	14236	0.00469925	0.000423549	0.013403
GO:0002520	immune system development	biological_process	multicellular organismal process	53	1064	444	14236	0.049812	0.000456223	0.0143554
GO:0043066	negative regulation of apoptotic process	biological_process	biological regulation	72	1064	650	14236	0.0676692	0.000457188	0.0143554
GO:0000791	euchromatin	cellular_component	organelle part	9	1230	34	17330	0.00731707	0.000459528	0.0143731
GO:0051130	positive regulation of cellular component organization	biological_process	biological regulation	58	1064	498	14236	0.0545113	0.000471645	0.0146954
GO:0035239	tube morphogenesis	biological_process	multicellular organismal process	43	1064	342	14236	0.0404135	0.000528101	0.0163914
GO:0098562	cytoplasmic side of membrane	cellular_component	membrane part	26	1230	183	17330	0.0211382	0.000537676	0.0166249
GO:0005088	Ras guanyl-nucleotide exchange factor activity	molecular_function	molecular function regulator	31	1178	227	16131	0.0263158	0.000544028	0.0167573
GO:0030308	negative regulation of cell growth	biological_process	biological regulation	22	1064	138	14236	0.0206767	0.000565195	0.0170845
GO:0040017	positive regulation of locomotion	biological_process	biological regulation	34	1064	252	14236	0.0319549	0.000563623	0.0170845
GO:0050731	positive regulation of peptidyl-tyrosine phosphorylation	biological_process	biological regulation	16	1064	86	14236	0.0150376	0.000562892	0.0170845
GO:0051128	regulation of cellular component organization	biological_process	biological regulation	128	1064	1298	14236	0.120301	0.000559915	0.0170845
GO:2000147	positive regulation of cell motility	biological_process	biological regulation	33	1064	242	14236	0.031015	0.000558322	0.0170845
GO:0000188	inactivation of MAPK activity	biological_process	biological regulation	8	1064	27	14236	0.0075188	0.000582961	0.0174736
GO:0061098	positive regulation of protein tyrosine kinase activity	biological_process	biological regulation	8	1064	27	14236	0.0075188	0.000582961	0.0174736
GO:0070373	negative regulation of ERK1 and ERK2 cascade	biological_process	biological regulation	7	1064	21	14236	0.00657895	0.000584537	0.0174736
GO:0050866	negative regulation of cell activation	biological_process	biological regulation	20	1064	121	14236	0.018797	0.000617919	0.0184035
GO:0043065	positive regulation of apoptotic process	biological_process	biological regulation	44	1064	355	14236	0.0413534	0.000620264	0.0184057
GO:0000079	regulation of cyclin-dependent protein serine/threonine kinase activity	biological_process	biological regulation	16	1064	87	14236	0.0150376	0.000642835	0.0188681
GO:0030595	leukocyte chemotaxis	biological_process	cellular process	16	1064	87	14236	0.0150376	0.000642835	0.0188681
GO:1904029	regulation of cyclin-dependent protein kinase activity	biological_process	biological regulation	16	1064	87	14236	0.0150376	0.000642835	0.0188681
GO:0016538	cyclin-dependent protein serine/threonine kinase regulator activity	molecular_function	molecular function regulator	8	1178	28	16131	0.00679117	0.000655462	0.0191693
GO:0061097	regulation of protein tyrosine kinase activity	biological_process	biological regulation	11	1064	48	14236	0.0103383	0.000666559	0.0194237
GO:0007229	integrin-mediated signaling pathway	biological_process	biological regulation	14	1064	71	14236	0.0131579	0.000669793	0.019448
GO:0050900	leukocyte migration	biological_process	cellular process	29	1064	206	14236	0.0272556	0.000703928	0.0203661
GO:0019900	kinase binding	molecular_function	binding	68	1178	630	16131	0.057725	0.000730451	0.0210583
GO:0043122	regulation of I-kappaB kinase/NF-kappaB signaling	biological_process	biological regulation	28	1064	197	14236	0.0263158	0.000741101	0.0212896
GO:0004713	protein tyrosine kinase activity	molecular_function	catalytic activity	26	1178	182	16131	0.0220713	0.000751131	0.0215015
GO:0060674	placenta blood vessel development	biological_process	multicellular organismal process	8	1064	28	14236	0.0075188	0.000763241	0.0217712
GO:0048660	regulation of smooth muscle cell proliferation	biological_process	biological regulation	14	1064	72	14236	0.0131579	0.000775349	0.022039
GO:0019901	protein kinase binding	molecular_function	binding	62	1178	564	16131	0.0526316	0.000780361	0.0221039
GO:0005488	binding	molecular_function	binding	1047	1178	13845	16131	0.888795	0.00079263	0.0223732
GO:0008630	intrinsic apoptotic signaling pathway in response to DNA damage	biological_process	biological regulation	11	1064	49	14236	0.0103383	0.000802369	0.0225694
GO:0003281	ventricular septum development	biological_process	multicellular organismal process	10	1064	42	14236	0.0093985	0.000844459	0.0236711
GO:0045088	regulation of innate immune response	biological_process	biological regulation	32	1064	238	14236	0.0300752	0.000857161	0.0239443
GO:0051090	regulation of DNA binding transcription factor activity	biological_process	biological regulation	44	1064	361	14236	0.0413534	0.000879651	0.0244549
GO:0090092	regulation of transmembrane receptor protein serine/threonine kinase signaling pathway	biological_process	biological regulation	26	1064	180	14236	0.0244361	0.000884493	0.0244549
GO:1902107	positive regulation of leukocyte differentiation	biological_process	biological regulation	17	1064	98	14236	0.0159774	0.000883801	0.0244549
GO:0002237	response to molecule of bacterial origin	biological_process	multi-organism process	29	1064	209	14236	0.0272556	0.000889864	0.0245197
GO:0031669	cellular response to nutrient levels	biological_process	cellular process	13	1064	65	14236	0.012218	0.000896737	0.0246253
GO:0090197	positive regulation of chemokine secretion	biological_process	biological regulation	4	1064	7	14236	0.0037594	0.000904041	0.024742
GO:0009719	response to endogenous stimulus	biological_process	response to stimulus	93	1064	905	14236	0.087406	0.000920647	0.0250274
GO:0035259	glucocorticoid receptor binding	molecular_function	binding	6	1178	17	16131	0.00509338	0.000918866	0.0250274
GO:0001890	placenta development	biological_process	multicellular organismal process	21	1064	134	14236	0.0197368	0.000937646	0.0254043
GO:0005515	protein binding	molecular_function	binding	836	1178	10787	16131	0.709677	0.000971038	0.0262213
GO:0060627	regulation of vesicle-mediated transport	biological_process	biological regulation	30	1064	220	14236	0.0281955	0.000974745	0.0262339
GO:0008544	epidermis development	biological_process	developmental process	33	1064	250	14236	0.031015	0.000988905	0.0265269
GO:0009617	response to bacterium	biological_process	multi-organism process	43	1064	353	14236	0.0404135	0.00101297	0.0270668
GO:0031401	positive regulation of protein modification process	biological_process	biological regulation	85	1064	816	14236	0.0798872	0.00101571	0.0270668
GO:0008284	positive regulation of cell proliferation	biological_process	biological regulation	75	1064	703	14236	0.0704887	0.00103431	0.0271971
GO:0030316	osteoclast differentiation	biological_process	cellular process	6	1064	17	14236	0.0056391	0.00103739	0.0271971
GO:0046697	decidualization	biological_process	multi-organism process	6	1064	17	14236	0.0056391	0.00103739	0.0271971
GO:0048661	positive regulation of smooth muscle cell proliferation	biological_process	biological regulation	10	1064	43	14236	0.0093985	0.00102777	0.0271971
GO:0090287	regulation of cellular response to growth factor stimulus	biological_process	biological regulation	29	1064	211	14236	0.0272556	0.00103644	0.0271971
GO:0005096	GTPase activator activity	molecular_function	molecular function regulator	35	1178	277	16131	0.0297114	0.00104577	0.0272484
GO:0048468	cell development	biological_process	cellular process	116	1064	1177	14236	0.109023	0.00104807	0.0272484
GO:0050678	regulation of epithelial cell proliferation	biological_process	biological regulation	30	1064	221	14236	0.0281955	0.00104944	0.0272484
GO:0000786	nucleosome	cellular_component	organelle part	15	1230	87	17330	0.0121951	0.00111277	0.0288006
GO:0001047	core promoter binding	molecular_function	binding	23	1178	158	16131	0.0195246	0.00114099	0.0292132
GO:0032642	regulation of chemokine production	biological_process	biological regulation	11	1064	51	14236	0.0103383	0.00114314	0.0292132
GO:0045637	regulation of myeloid cell differentiation	biological_process	biological regulation	21	1064	136	14236	0.0197368	0.00113889	0.0292132
GO:0045765	regulation of angiogenesis	biological_process	biological regulation	24	1064	164	14236	0.0225564	0.00114073	0.0292132
GO:0022407	regulation of cell-cell adhesion	biological_process	biological regulation	37	1064	293	14236	0.0347744	0.00115809	0.0295023
GO:0032354	response to follicle-stimulating hormone	biological_process	response to stimulus	5	1064	12	14236	0.00469925	0.00117279	0.0296898
GO:0036315	cellular response to sterol	biological_process	cellular process	5	1064	12	14236	0.00469925	0.00117279	0.0296898
GO:0002376	immune system process	biological_process	immune system process	148	1064	1563	14236	0.139098	0.00118529	0.029913
GO:0043407	negative regulation of MAP kinase activity	biological_process	biological regulation	13	1064	67	14236	0.012218	0.00120578	0.0303356
GO:0032101	regulation of response to external stimulus	biological_process	biological regulation	50	1064	431	14236	0.0469925	0.00123154	0.0308875
GO:0005089	Rho guanyl-nucleotide exchange factor activity	molecular_function	molecular function regulator	14	1178	77	16131	0.0118846	0.00123741	0.030939
GO:0002695	negative regulation of leukocyte activation	biological_process	biological regulation	18	1064	110	14236	0.0169173	0.00127611	0.0318085
GO:0044424	intracellular part	cellular_component	cell	991	1230	13363	17330	0.805691	0.00131683	0.0327228
GO:0044087	regulation of cellular component biogenesis	biological_process	biological regulation	45	1064	379	14236	0.0422932	0.00132816	0.0329035
GO:0043408	regulation of MAPK cascade	biological_process	biological regulation	54	1064	476	14236	0.0507519	0.00133804	0.0330472
GO:0065009	regulation of molecular function	biological_process	biological regulation	166	1064	1787	14236	0.156015	0.00137281	0.0338028
GO:0001570	vasculogenesis	biological_process	cellular process	13	1064	68	14236	0.012218	0.00139082	0.0341424
GO:0001763	morphogenesis of a branching structure	biological_process	multicellular organismal process	25	1064	176	14236	0.0234962	0.00140085	0.0342849
GO:0045860	positive regulation of protein kinase activity	biological_process	biological regulation	49	1064	423	14236	0.0460526	0.0014149	0.0345245
GO:0043300	regulation of leukocyte degranulation	biological_process	biological regulation	7	1064	24	14236	0.00657895	0.00142724	0.034721
GO:0033674	positive regulation of kinase activity	biological_process	biological regulation	51	1064	445	14236	0.0479323	0.00144355	0.0350127
GO:0050864	regulation of B cell activation	biological_process	biological regulation	15	1064	85	14236	0.0140977	0.00145316	0.0351405
GO:0002697	regulation of immune effector process	biological_process	biological regulation	28	1064	206	14236	0.0263158	0.00148653	0.0358404
GO:0009612	response to mechanical stimulus	biological_process	response to stimulus	21	1064	139	14236	0.0197368	0.00150972	0.0362915
GO:1902105	regulation of leukocyte differentiation	biological_process	biological regulation	25	1064	177	14236	0.0234962	0.00151858	0.0363965
GO:0043207	response to external biotic stimulus	biological_process	response to stimulus	60	1064	545	14236	0.056391	0.00154073	0.0367101
GO:0051707	response to other organism	biological_process	multi-organism process	60	1064	545	14236	0.056391	0.00154073	0.0367101
GO:0009991	response to extracellular stimulus	biological_process	response to stimulus	34	1064	267	14236	0.0319549	0.0015605	0.0368183
GO:0042663	regulation of endodermal cell fate specification	biological_process	biological regulation	3	1064	4	14236	0.00281955	0.00157254	0.0368183
GO:0045074	regulation of interleukin-10 biosynthetic process	biological_process	biological regulation	3	1064	4	14236	0.00281955	0.00157254	0.0368183
GO:0045415	negative regulation of interleukin-8 biosynthetic process	biological_process	biological regulation	3	1064	4	14236	0.00281955	0.00157254	0.0368183
GO:1901724	positive regulation of cell proliferation involved in kidney development	biological_process	biological regulation	3	1064	4	14236	0.00281955	0.00157254	0.0368183
GO:1903224	regulation of endodermal cell differentiation	biological_process	biological regulation	3	1064	4	14236	0.00281955	0.00157254	0.0368183
GO:0060968	regulation of gene silencing	biological_process	biological regulation	8	1064	31	14236	0.0075188	0.00158507	0.0370046
GO:0061138	morphogenesis of a branching epithelium	biological_process	multicellular organismal process	24	1064	168	14236	0.0225564	0.00159738	0.0371849
GO:0030155	regulation of cell adhesion	biological_process	biological regulation	53	1064	469	14236	0.049812	0.00160826	0.0372244
GO:0030695	GTPase regulator activity	molecular_function	molecular function regulator	37	1178	305	16131	0.0314092	0.00160734	0.0372244
GO:0008499	UDP-galactose:beta-N-acetylglucosamine beta-1,3-galactosyltransferase activity	molecular_function	catalytic activity	5	1178	13	16131	0.00424448	0.00161348	0.0372387
GO:0030036	actin cytoskeleton organization	biological_process	cellular component organization or biogenesis	37	1064	299	14236	0.0347744	0.00166898	0.0384102
GO:0065008	regulation of biological quality	biological_process	biological regulation	227	1064	2550	14236	0.213346	0.00169382	0.0388714
GO:0032496	response to lipopolysaccharide	biological_process	multi-organism process	27	1064	198	14236	0.0253759	0.00170533	0.0389151
GO:0051782	negative regulation of cell division	biological_process	biological regulation	4	1064	8	14236	0.0037594	0.00170119	0.0389151
GO:0009607	response to biotic stimulus	biological_process	response to stimulus	62	1064	570	14236	0.0582707	0.00173595	0.0395027
GO:0004715	non-membrane spanning protein tyrosine kinase activity	molecular_function	catalytic activity	10	1178	47	16131	0.00848896	0.00178281	0.0404552
GO:0045414	regulation of interleukin-8 biosynthetic process	biological_process	biological regulation	5	1064	13	14236	0.00469925	0.00178917	0.0404863
GO:0030098	lymphocyte differentiation	biological_process	cellular process	23	1064	160	14236	0.0216165	0.00182005	0.0410702
GO:0001893	maternal placenta development	biological_process	multi-organism process	7	1064	25	14236	0.00657895	0.00185597	0.0416487
GO:0031952	regulation of protein autophosphorylation	biological_process	biological regulation	7	1064	25	14236	0.00657895	0.00185597	0.0416487
GO:0032270	positive regulation of cellular protein metabolic process	biological_process	biological regulation	100	1064	1008	14236	0.093985	0.00188771	0.042244
GO:0048146	positive regulation of fibroblast proliferation	biological_process	biological regulation	9	1064	39	14236	0.00845865	0.00192562	0.0429737
GO:0035556	intracellular signal transduction	biological_process	biological regulation	108	1064	1103	14236	0.101504	0.00193774	0.0431254
GO:0001666	response to hypoxia	biological_process	response to stimulus	30	1064	230	14236	0.0281955	0.00197845	0.0436192
GO:0016740	transferase activity	molecular_function	catalytic activity	212	1178	2421	16131	0.179966	0.00198034	0.0436192
GO:0017157	regulation of exocytosis	biological_process	biological regulation	14	1064	79	14236	0.0131579	0.00198147	0.0436192
GO:0032653	regulation of interleukin-10 production	biological_process	biological regulation	8	1064	32	14236	0.0075188	0.00197701	0.0436192
GO:0031529	ruffle organization	biological_process	cellular component organization or biogenesis	6	1064	19	14236	0.0056391	0.00199819	0.0437496
GO:1903307	positive regulation of regulated secretory pathway	biological_process	biological regulation	6	1064	19	14236	0.0056391	0.00199819	0.0437496
GO:0001190	transcriptional activator activity, RNA polymerase II transcription factor binding	molecular_function	transcription regulator activity	11	1178	56	16131	0.00933786	0.00211927	0.0459043
GO:0045596	negative regulation of cell differentiation	biological_process	biological regulation	50	1064	442	14236	0.0469925	0.00210483	0.0459043
GO:0046966	thyroid hormone receptor binding	molecular_function	binding	8	1178	33	16131	0.00679117	0.00211251	0.0459043
GO:0098811	transcriptional repressor activity, RNA polymerase II activating transcription factor binding	molecular_function	transcription regulator activity	11	1178	56	16131	0.00933786	0.00211927	0.0459043
GO:1903034	regulation of response to wounding	biological_process	biological regulation	16	1064	97	14236	0.0150376	0.00213171	0.0460506
GO:0051726	regulation of cell cycle	biological_process	biological regulation	78	1064	757	14236	0.0733083	0.0021806	0.0469816
GO:0036293	response to decreased oxygen levels	biological_process	response to stimulus	30	1064	232	14236	0.0281955	0.00226156	0.0485966
GO:0004674	protein serine/threonine kinase activity	molecular_function	catalytic activity	50	1178	454	16131	0.0424448	0.0023246	0.0498191
GO:0017017	MAP kinase tyrosine/serine/threonine phosphatase activity	molecular_function	catalytic activity	5	1178	14	16131	0.00424448	0.00236	0.0504442
GO:0001775	cell activation	biological_process	cellular process	59	1064	544	14236	0.0554511	0.00237162	0.0505593
GO:0005912	adherens junction	cellular_component	cell junction	53	1230	502	17330	0.0430894	0.00239191	0.0508578
GO:0003682	chromatin binding	molecular_function	binding	51	1178	466	16131	0.0432937	0.00241081	0.0510955
GO:0050863	regulation of T cell activation	biological_process	biological regulation	30	1064	233	14236	0.0281955	0.0024157	0.0510955
GO:0071944	cell periphery	cellular_component	cell	402	1230	5042	17330	0.326829	0.00242425	0.0511428
GO:0043009	chordate embryonic development	biological_process	multicellular organismal process	61	1064	567	14236	0.0573308	0.00243507	0.0512376
GO:0008637	apoptotic mitochondrial changes	biological_process	cellular component organization or biogenesis	8	1064	33	14236	0.0075188	0.0024414	0.0512378
GO:0044815	DNA packaging complex	cellular_component	macromolecular complex	15	1230	94	17330	0.0121951	0.00246949	0.0516934
GO:0005886	plasma membrane	cellular_component	cell	394	1230	4935	17330	0.320325	0.00249407	0.0520733
GO:0030100	regulation of endocytosis	biological_process	biological regulation	19	1064	126	14236	0.0178571	0.00253088	0.0526972
GO:0050871	positive regulation of B cell activation	biological_process	biological regulation	11	1064	56	14236	0.0103383	0.00253696	0.0526972
GO:0048754	branching morphogenesis of an epithelial tube	biological_process	multicellular organismal process	21	1064	145	14236	0.0197368	0.00256631	0.0531705
GO:0003181	atrioventricular valve morphogenesis	biological_process	multicellular organismal process	5	1064	14	14236	0.00469925	0.00261321	0.0537301
GO:0033280	response to vitamin D	biological_process	response to stimulus	5	1064	14	14236	0.00469925	0.00261321	0.0537301
GO:0051896	regulation of protein kinase B signaling	biological_process	biological regulation	15	1064	90	14236	0.0140977	0.0026091	0.0537301
GO:0005085	guanyl-nucleotide exchange factor activity	molecular_function	molecular function regulator	36	1178	303	16131	0.0305603	0.00263305	0.0538732
GO:0097193	intrinsic apoptotic signaling pathway	biological_process	biological regulation	17	1064	108	14236	0.0159774	0.00263348	0.0538732
GO:0050778	positive regulation of immune response	biological_process	biological regulation	44	1064	382	14236	0.0413534	0.00269325	0.0549573
GO:0044295	axonal growth cone	cellular_component	cell	6	1230	21	17330	0.00487805	0.00271188	0.05506
GO:0070482	response to oxygen levels	biological_process	response to stimulus	31	1064	245	14236	0.0291353	0.00271086	0.05506
GO:1903037	regulation of leukocyte cell-cell adhesion	biological_process	biological regulation	30	1064	235	14236	0.0281955	0.00275112	0.0557171
GO:0014070	response to organic cyclic compound	biological_process	response to stimulus	59	1064	548	14236	0.0554511	0.00279792	0.0565237
GO:0017053	transcriptional repressor complex	cellular_component	macromolecular complex	14	1230	86	17330	0.0113821	0.00280728	0.0565717
GO:0051015	actin filament binding	molecular_function	binding	19	1178	130	16131	0.016129	0.00281775	0.0566416
GO:0002579	positive regulation of antigen processing and presentation	biological_process	biological regulation	4	1064	9	14236	0.0037594	0.00288162	0.0566682
GO:0005102	receptor binding	molecular_function	binding	138	1178	1509	16131	0.117148	0.00287942	0.0566682
GO:0042542	response to hydrogen peroxide	biological_process	response to stimulus	12	1064	65	14236	0.0112782	0.00284977	0.0566682
GO:0045639	positive regulation of myeloid cell differentiation	biological_process	biological regulation	12	1064	65	14236	0.0112782	0.00284977	0.0566682
GO:0048511	rhythmic process	biological_process	rhythmic process	22	1064	156	14236	0.0206767	0.00288202	0.0566682
GO:0048598	embryonic morphogenesis	biological_process	multicellular organismal process	56	1064	515	14236	0.0526316	0.00285704	0.0566682
GO:0061081	positive regulation of myeloid leukocyte cytokine production involved in immune response	biological_process	biological regulation	4	1064	9	14236	0.0037594	0.00288162	0.0566682
GO:0071372	cellular response to follicle-stimulating hormone stimulus	biological_process	cellular process	4	1064	9	14236	0.0037594	0.00288162	0.0566682
GO:1903579	negative regulation of ATP metabolic process	biological_process	biological regulation	4	1064	9	14236	0.0037594	0.00288162	0.0566682
GO:1903305	regulation of regulated secretory pathway	biological_process	biological regulation	10	1064	49	14236	0.0093985	0.00292864	0.0574453
GO:0050878	regulation of body fluid levels	biological_process	biological regulation	65	1064	617	14236	0.0610902	0.00295754	0.057872
GO:0032774	RNA biosynthetic process	biological_process	cellular process	61	1064	572	14236	0.0573308	0.00297782	0.0581284
GO:0002886	regulation of myeloid leukocyte mediated immunity	biological_process	biological regulation	7	1064	27	14236	0.00657895	0.00300642	0.0582656
GO:0021955	central nervous system neuron axonogenesis	biological_process	cellular component organization or biogenesis	7	1064	27	14236	0.00657895	0.00300642	0.0582656
GO:0048008	platelet-derived growth factor receptor signaling pathway	biological_process	biological regulation	7	1064	27	14236	0.00657895	0.00300642	0.0582656
GO:0044877	macromolecular complex binding	molecular_function	binding	90	1178	926	16131	0.0764007	0.00302999	0.0584428
GO:0050790	regulation of catalytic activity	biological_process	biological regulation	130	1064	1382	14236	0.12218	0.00302741	0.0584428
GO:0032675	regulation of interleukin-6 production	biological_process	biological regulation	13	1064	74	14236	0.012218	0.00306225	0.0589248
GO:0046982	protein heterodimerization activity	molecular_function	binding	52	1178	483	16131	0.0441426	0.00309663	0.0594451
GO:0046965	retinoid X receptor binding	molecular_function	binding	6	1178	21	16131	0.00509338	0.00312975	0.0597133
GO:0090288	negative regulation of cellular response to growth factor stimulus	biological_process	biological regulation	18	1064	119	14236	0.0169173	0.00313272	0.0597133
GO:0097190	apoptotic signaling pathway	biological_process	biological regulation	22	1064	157	14236	0.0206767	0.00312179	0.0597133
GO:0001076	transcription factor activity, RNA polymerase II transcription factor binding	molecular_function	transcription regulator activity	20	1178	141	16131	0.0169779	0.00316222	0.0601342
GO:0006351	transcription, DNA-templated	biological_process	cellular process	60	1064	563	14236	0.056391	0.00325694	0.0610752
GO:0009792	embryo development ending in birth or egg hatching	biological_process	multicellular organismal process	61	1064	574	14236	0.0573308	0.00322276	0.0610752
GO:0010632	regulation of epithelial cell migration	biological_process	biological regulation	16	1064	101	14236	0.0150376	0.00324824	0.0610752
GO:0032956	regulation of actin cytoskeleton organization	biological_process	biological regulation	25	1064	187	14236	0.0234962	0.00324351	0.0610752
GO:0097659	nucleic acid-templated transcription	biological_process	cellular process	60	1064	563	14236	0.056391	0.00325694	0.0610752
GO:1904018	positive regulation of vasculature development	biological_process	biological regulation	16	1064	101	14236	0.0150376	0.00324824	0.0610752
GO:0010717	regulation of epithelial to mesenchymal transition	biological_process	biological regulation	9	1064	42	14236	0.00845865	0.00331079	0.0617989
GO:0034103	regulation of tissue remodeling	biological_process	biological regulation	9	1064	42	14236	0.00845865	0.00331079	0.0617989
GO:0033549	MAP kinase phosphatase activity	molecular_function	catalytic activity	5	1178	15	16131	0.00424448	0.00332907	0.061855
GO:0048531	beta-1,3-galactosyltransferase activity	molecular_function	catalytic activity	5	1178	15	16131	0.00424448	0.00332907	0.061855
GO:0010770	positive regulation of cell morphogenesis involved in differentiation	biological_process	biological regulation	11	1064	58	14236	0.0103383	0.00338362	0.062439
GO:0070161	anchoring junction	cellular_component	cell junction	54	1230	522	17330	0.0439024	0.0033721	0.062439
GO:0070663	regulation of leukocyte proliferation	biological_process	biological regulation	22	1064	158	14236	0.0206767	0.00337809	0.062439
GO:0032432	actin filament bundle	cellular_component	organelle part	11	1230	61	17330	0.00894309	0.00343399	0.0632244
GO:0071363	cellular response to growth factor stimulus	biological_process	cellular process	52	1064	475	14236	0.0488722	0.00345537	0.0634737
GO:0022409	positive regulation of cell-cell adhesion	biological_process	biological regulation	26	1064	198	14236	0.0244361	0.00347896	0.0636187
GO:0051525	NFAT protein binding	molecular_function	binding	3	1178	5	16131	0.00254669	0.00347308	0.0636187
GO:0007398	ectoderm development	biological_process	developmental process	6	1064	21	14236	0.0056391	0.00351275	0.0639479
GO:0021952	central nervous system projection neuron axonogenesis	biological_process	cellular component organization or biogenesis	6	1064	21	14236	0.0056391	0.00351275	0.0639479
GO:1901701	cellular response to oxygen-containing compound	biological_process	cellular process	62	1064	588	14236	0.0582707	0.00357929	0.0650131
GO:0030593	neutrophil chemotaxis	biological_process	cellular process	8	1064	35	14236	0.0075188	0.00362296	0.0653666
GO:0070374	positive regulation of ERK1 and ERK2 cascade	biological_process	biological regulation	15	1064	93	14236	0.0140977	0.00361027	0.0653666
GO:1990266	neutrophil migration	biological_process	cellular process	8	1064	35	14236	0.0075188	0.00362296	0.0653666
GO:0002887	negative regulation of myeloid leukocyte mediated immunity	biological_process	biological regulation	3	1064	5	14236	0.00281955	0.0037124	0.0653786
GO:0034139	regulation of toll-like receptor 3 signaling pathway	biological_process	biological regulation	3	1064	5	14236	0.00281955	0.0037124	0.0653786
GO:0043301	negative regulation of leukocyte degranulation	biological_process	biological regulation	3	1064	5	14236	0.00281955	0.0037124	0.0653786
GO:0045598	regulation of fat cell differentiation	biological_process	biological regulation	12	1064	67	14236	0.0112782	0.00369791	0.0653786
GO:0045666	positive regulation of neuron differentiation	biological_process	biological regulation	23	1064	169	14236	0.0216165	0.00370374	0.0653786
GO:0045820	negative regulation of glycolytic process	biological_process	biological regulation	3	1064	5	14236	0.00281955	0.0037124	0.0653786
GO:0051195	negative regulation of cofactor metabolic process	biological_process	biological regulation	3	1064	5	14236	0.00281955	0.0037124	0.0653786
GO:0051198	negative regulation of coenzyme metabolic process	biological_process	biological regulation	3	1064	5	14236	0.00281955	0.0037124	0.0653786
GO:0061003	positive regulation of dendritic spine morphogenesis	biological_process	biological regulation	3	1064	5	14236	0.00281955	0.0037124	0.0653786
GO:0072216	positive regulation of metanephros development	biological_process	biological regulation	5	1064	15	14236	0.00469925	0.00368097	0.0653786
GO:2001179	regulation of interleukin-10 secretion	biological_process	biological regulation	3	1064	5	14236	0.00281955	0.0037124	0.0653786
GO:0003707	steroid hormone receptor activity	molecular_function	signal transducer activity	11	1178	60	16131	0.00933786	0.00373397	0.0656159
GO:0040008	regulation of growth	biological_process	biological regulation	57	1064	533	14236	0.0535714	0.00378127	0.0663032
GO:0035023	regulation of Rho protein signal transduction	biological_process	biological regulation	13	1064	76	14236	0.012218	0.00389195	0.0680966
GO:0070848	response to growth factor	biological_process	response to stimulus	53	1064	489	14236	0.049812	0.00390402	0.0681606
GO:0002685	regulation of leukocyte migration	biological_process	biological regulation	15	1064	94	14236	0.0140977	0.00400667	0.0697322
GO:0060562	epithelial tube morphogenesis	biological_process	multicellular organismal process	36	1064	304	14236	0.0338346	0.00401126	0.0697322
GO:0043235	receptor complex	cellular_component	macromolecular complex	37	1230	331	17330	0.0300813	0.00406872	0.0705797
GO:0007267	cell-cell signaling	biological_process	cellular process	86	1064	869	14236	0.0808271	0.00412168	0.0713455
GO:0051348	negative regulation of transferase activity	biological_process	biological regulation	31	1064	252	14236	0.0291353	0.00415703	0.071804
GO:0002700	regulation of production of molecular mediator of immune response	biological_process	biological regulation	12	1064	68	14236	0.0112782	0.00419229	0.0721056
GO:0030099	myeloid cell differentiation	biological_process	cellular process	21	1064	151	14236	0.0197368	0.00418733	0.0721056
GO:0071345	cellular response to cytokine stimulus	biological_process	cellular process	42	1064	370	14236	0.0394737	0.00431641	0.0740831
GO:0048566	embryonic digestive tract development	biological_process	multicellular organismal process	8	1064	36	14236	0.0075188	0.0043588	0.0746525
GO:0007264	small GTPase mediated signal transduction	biological_process	biological regulation	33	1064	274	14236	0.031015	0.00441588	0.0754706
GO:0045834	positive regulation of lipid metabolic process	biological_process	biological regulation	15	1064	95	14236	0.0140977	0.0044379	0.0756376
GO:0061041	regulation of wound healing	biological_process	biological regulation	14	1064	86	14236	0.0131579	0.00444432	0.0756376
GO:0007596	blood coagulation	biological_process	biological regulation	51	1064	470	14236	0.0479323	0.00448318	0.0758063
GO:0032717	negative regulation of interleukin-8 production	biological_process	biological regulation	4	1064	10	14236	0.0037594	0.00452033	0.0758063
GO:0034143	regulation of toll-like receptor 4 signaling pathway	biological_process	biological regulation	4	1064	10	14236	0.0037594	0.00452033	0.0758063
GO:0046627	negative regulation of insulin receptor signaling pathway	biological_process	biological regulation	6	1064	22	14236	0.0056391	0.0045291	0.0758063
GO:0050817	coagulation	biological_process	multicellular organismal process	51	1064	470	14236	0.0479323	0.00448318	0.0758063
GO:0060589	nucleoside-triphosphatase regulator activity	molecular_function	molecular function regulator	38	1178	335	16131	0.0322581	0.00451927	0.0758063
GO:0061900	glial cell activation	biological_process	cellular process	4	1064	10	14236	0.0037594	0.00452033	0.0758063
GO:2000027	regulation of organ morphogenesis	biological_process	biological regulation	21	1064	152	14236	0.0197368	0.00452645	0.0758063
GO:0016307	phosphatidylinositol phosphate kinase activity	molecular_function	catalytic activity	5	1178	16	16131	0.00424448	0.00455434	0.0760716
GO:0030111	regulation of Wnt signaling pathway	biological_process	biological regulation	25	1064	192	14236	0.0234962	0.00459691	0.0766247
GO:0046850	regulation of bone remodeling	biological_process	biological regulation	7	1064	29	14236	0.00657895	0.004635	0.0771009
GO:0019902	phosphatase binding	molecular_function	binding	22	1178	166	16131	0.0186757	0.00471517	0.0782738
GO:0009314	response to radiation	biological_process	response to stimulus	38	1064	329	14236	0.0357143	0.00483419	0.0800854
GO:0001701	in utero embryonic development	biological_process	multicellular organismal process	39	1064	340	14236	0.0366541	0.00488378	0.0807419
GO:0003231	cardiac ventricle development	biological_process	multicellular organismal process	15	1064	96	14236	0.0140977	0.00490614	0.0807818
GO:0051250	negative regulation of lymphocyte activation	biological_process	biological regulation	15	1064	96	14236	0.0140977	0.00490614	0.0807818
GO:0042476	odontogenesis	biological_process	multicellular organismal process	14	1064	87	14236	0.0131579	0.00494201	0.0812074
GO:0050870	positive regulation of T cell activation	biological_process	biological regulation	23	1064	173	14236	0.0216165	0.00495815	0.0813076
GO:0001516	prostaglandin biosynthetic process	biological_process	cellular process	5	1064	16	14236	0.00469925	0.00502858	0.081719
GO:0034122	negative regulation of toll-like receptor signaling pathway	biological_process	biological regulation	5	1064	16	14236	0.00469925	0.00502858	0.081719
GO:0046457	prostanoid biosynthetic process	biological_process	cellular process	5	1064	16	14236	0.00469925	0.00502858	0.081719
GO:0072563	endothelial microparticle	cellular_component	extracellular region	2	1230	2	17330	0.00162602	0.00503367	0.081719
GO:1990622	CHOP-ATF3 complex	cellular_component	macromolecular complex	2	1230	2	17330	0.00162602	0.00503367	0.081719
GO:0035257	nuclear hormone receptor binding	molecular_function	binding	22	1178	167	16131	0.0186757	0.00506701	0.0819319
GO:0051591	response to cAMP	biological_process	response to stimulus	11	1064	61	14236	0.0103383	0.00506311	0.0819319
GO:0008047	enzyme activator activity	molecular_function	molecular function regulator	51	1178	484	16131	0.0432937	0.00516768	0.0833931
GO:0030890	positive regulation of B cell proliferation	biological_process	biological regulation	8	1064	37	14236	0.0075188	0.00520433	0.0838176
GO:0048608	reproductive structure development	biological_process	multicellular organismal process	44	1064	396	14236	0.0413534	0.00522808	0.0838667
GO:0061458	reproductive system development	biological_process	multicellular organismal process	44	1064	396	14236	0.0413534	0.00522808	0.0838667
GO:0005667	transcription factor complex	cellular_component	cell	36	1230	325	17330	0.0292683	0.00527008	0.0843466
GO:0007599	hemostasis	biological_process	biological regulation	51	1064	474	14236	0.0479323	0.00529361	0.0843466
GO:0030888	regulation of B cell proliferation	biological_process	biological regulation	10	1064	53	14236	0.0093985	0.00529964	0.0843466
GO:2000106	regulation of leukocyte apoptotic process	biological_process	biological regulation	10	1064	53	14236	0.0093985	0.00529964	0.0843466
GO:0004666	prostaglandin-endoperoxide synthase activity	molecular_function	catalytic activity	2	1178	2	16131	0.00169779	0.00532876	0.0843649
GO:0004947	bradykinin receptor activity	molecular_function	signal transducer activity	2	1178	2	16131	0.00169779	0.00532876	0.0843649
GO:0050679	positive regulation of epithelial cell proliferation	biological_process	biological regulation	18	1064	125	14236	0.0169173	0.00533204	0.0843649
GO:0034358	plasma lipoprotein particle	cellular_component	extracellular region	8	1230	39	17330	0.00650407	0.00535423	0.0843864
GO:1990777	lipoprotein particle	cellular_component	macromolecular complex	8	1230	39	17330	0.00650407	0.00535423	0.0843864
GO:0032677	regulation of interleukin-8 production	biological_process	biological regulation	9	1064	45	14236	0.00845865	0.00537994	0.084463
GO:0071621	granulocyte chemotaxis	biological_process	cellular process	9	1064	45	14236	0.00845865	0.00537994	0.084463
GO:0000414	regulation of histone H3-K36 methylation	biological_process	biological regulation	2	1064	2	14236	0.0018797	0.00558122	0.0851478
GO:0001191	transcriptional repressor activity, RNA polymerase II transcription factor binding	molecular_function	transcription regulator activity	14	1178	90	16131	0.0118846	0.00550843	0.0851478
GO:0002277	myeloid dendritic cell activation involved in immune response	biological_process	cellular process	2	1064	2	14236	0.0018797	0.00558122	0.0851478
GO:0010512	negative regulation of phosphatidylinositol biosynthetic process	biological_process	biological regulation	2	1064	2	14236	0.0018797	0.00558122	0.0851478
GO:0010594	regulation of endothelial cell migration	biological_process	biological regulation	13	1064	79	14236	0.012218	0.00546845	0.0851478
GO:0019371	cyclooxygenase pathway	biological_process	cellular process	2	1064	2	14236	0.0018797	0.00558122	0.0851478
GO:0032764	negative regulation of mast cell cytokine production	biological_process	biological regulation	2	1064	2	14236	0.0018797	0.00558122	0.0851478
GO:0032765	positive regulation of mast cell cytokine production	biological_process	biological regulation	2	1064	2	14236	0.0018797	0.00558122	0.0851478
GO:0034140	negative regulation of toll-like receptor 3 signaling pathway	biological_process	biological regulation	2	1064	2	14236	0.0018797	0.00558122	0.0851478
GO:0038018	Wnt receptor catabolic process	biological_process	biological regulation	2	1064	2	14236	0.0018797	0.00558122	0.0851478
GO:0043314	negative regulation of neutrophil degranulation	biological_process	biological regulation	2	1064	2	14236	0.0018797	0.00558122	0.0851478
GO:0045837	negative regulation of membrane potential	biological_process	biological regulation	2	1064	2	14236	0.0018797	0.00558122	0.0851478
GO:0071495	cellular response to endogenous stimulus	biological_process	response to stimulus	72	1064	715	14236	0.0676692	0.00554759	0.0851478
GO:0090291	negative regulation of osteoclast proliferation	biological_process	biological regulation	2	1064	2	14236	0.0018797	0.00558122	0.0851478
GO:1902564	negative regulation of neutrophil activation	biological_process	biological regulation	2	1064	2	14236	0.0018797	0.00558122	0.0851478
GO:0046626	regulation of insulin receptor signaling pathway	biological_process	biological regulation	7	1064	30	14236	0.00657895	0.00566301	0.0860714
GO:2000107	negative regulation of leukocyte apoptotic process	biological_process	biological regulation	7	1064	30	14236	0.00657895	0.00566301	0.0860714
GO:1903039	positive regulation of leukocyte cell-cell adhesion	biological_process	biological regulation	23	1064	175	14236	0.0216165	0.00570691	0.0865762
GO:0032459	regulation of protein oligomerization	biological_process	biological regulation	6	1064	23	14236	0.0056391	0.00574648	0.0866895
GO:0032733	positive regulation of interleukin-10 production	biological_process	biological regulation	6	1064	23	14236	0.0056391	0.00574648	0.0866895
GO:1905475	regulation of protein localization to membrane	biological_process	biological regulation	6	1064	23	14236	0.0056391	0.00574648	0.0866895
GO:0043433	negative regulation of DNA binding transcription factor activity	biological_process	biological regulation	18	1064	126	14236	0.0169173	0.0057989	0.0873176
GO:0000979	RNA polymerase II core promoter sequence-specific DNA binding	molecular_function	binding	10	1178	55	16131	0.00848896	0.00592828	0.0889352
GO:0005544	calcium-dependent phospholipid binding	molecular_function	binding	10	1178	55	16131	0.00848896	0.00592828	0.0889352
GO:0006024	glycosaminoglycan biosynthetic process	biological_process	metabolic process	15	1064	98	14236	0.0140977	0.00596278	0.0892874
GO:0016605	PML body	cellular_component	organelle part	15	1230	103	17330	0.0121951	0.00598427	0.0894438
GO:0090100	positive regulation of transmembrane receptor protein serine/threonine kinase signaling pathway	biological_process	biological regulation	12	1064	71	14236	0.0112782	0.00600002	0.0895142
GO:0032993	protein-DNA complex	cellular_component	macromolecular complex	21	1230	164	17330	0.0170732	0.00614181	0.0914611
GO:0032722	positive regulation of chemokine production	biological_process	biological regulation	8	1064	38	14236	0.0075188	0.00616959	0.0915381
GO:0060425	lung morphogenesis	biological_process	multicellular organismal process	8	1064	38	14236	0.0075188	0.00616959	0.0915381
GO:0006023	aminoglycan biosynthetic process	biological_process	metabolic process	15	1064	99	14236	0.0140977	0.00655588	0.0968841
GO:0043405	regulation of MAP kinase activity	biological_process	biological regulation	34	1064	292	14236	0.0319549	0.00656578	0.0968841
GO:1902275	regulation of chromatin organization	biological_process	biological regulation	15	1064	99	14236	0.0140977	0.00655588	0.0968841
GO:0043123	positive regulation of I-kappaB kinase/NF-kappaB signaling	biological_process	biological regulation	21	1064	157	14236	0.0197368	0.0065815	0.0969395
GO:0002577	regulation of antigen processing and presentation	biological_process	biological regulation	4	1064	11	14236	0.0037594	0.00668692	0.0971477
GO:0003171	atrioventricular valve development	biological_process	multicellular organismal process	5	1064	17	14236	0.00469925	0.00669157	0.0971477
GO:0042789	mRNA transcription from RNA polymerase II promoter	biological_process	cellular process	4	1064	11	14236	0.0037594	0.00668692	0.0971477
GO:0045737	positive regulation of cyclin-dependent protein serine/threonine kinase activity	biological_process	biological regulation	5	1064	17	14236	0.00469925	0.00669157	0.0971477
GO:0060033	anatomical structure regression	biological_process	developmental process	4	1064	11	14236	0.0037594	0.00668692	0.0971477
GO:0060571	morphogenesis of an epithelial fold	biological_process	developmental process	5	1064	17	14236	0.00469925	0.00669157	0.0971477
GO:0071397	cellular response to cholesterol	biological_process	cellular process	4	1064	11	14236	0.0037594	0.00668692	0.0971477
GO:1904031	positive regulation of cyclin-dependent protein kinase activity	biological_process	biological regulation	5	1064	17	14236	0.00469925	0.00669157	0.0971477
GO:0050777	negative regulation of immune response	biological_process	biological regulation	13	1064	81	14236	0.012218	0.00677697	0.0982115
GO:0060393	regulation of pathway-restricted SMAD protein phosphorylation	biological_process	biological regulation	7	1064	31	14236	0.00657895	0.00685241	0.0987748
GO:1901983	regulation of protein acetylation	biological_process	biological regulation	7	1064	31	14236	0.00657895	0.00685241	0.0987748
GO:2000756	regulation of peptidyl-lysine acetylation	biological_process	biological regulation	7	1064	31	14236	0.00657895	0.00685241	0.0987748
GO:0001938	positive regulation of endothelial cell proliferation	biological_process	biological regulation	10	1064	55	14236	0.0093985	0.00694483	0.0993215
GO:0006346	methylation-dependent chromatin silencing	biological_process	cellular component organization or biogenesis	3	1064	6	14236	0.00281955	0.00701294	0.0993215
GO:0006367	transcription initiation from RNA polymerase II promoter	biological_process	cellular process	24	1064	188	14236	0.0225564	0.00692105	0.0993215
GO:0031064	negative regulation of histone deacetylation	biological_process	biological regulation	3	1064	6	14236	0.00281955	0.00701294	0.0993215
GO:0031665	negative regulation of lipopolysaccharide-mediated signaling pathway	biological_process	biological regulation	3	1064	6	14236	0.00281955	0.00701294	0.0993215
GO:0036015	response to interleukin-3	biological_process	response to stimulus	3	1064	6	14236	0.00281955	0.00701294	0.0993215
GO:0036016	cellular response to interleukin-3	biological_process	cellular process	3	1064	6	14236	0.00281955	0.00701294	0.0993215
GO:0048546	digestive tract morphogenesis	biological_process	multicellular organismal process	10	1064	55	14236	0.0093985	0.00694483	0.0993215
GO:0090315	negative regulation of protein targeting to membrane	biological_process	biological regulation	3	1064	6	14236	0.00281955	0.00701294	0.0993215
GO:1901532	regulation of hematopoietic progenitor cell differentiation	biological_process	biological regulation	3	1064	6	14236	0.00281955	0.00701294	0.0993215
GO:0000902	cell morphogenesis	biological_process	cellular component organization or biogenesis	61	1064	595	14236	0.0573308	0.00704566	0.0996106
GO:0019904	protein domain specific binding	molecular_function	binding	63	1178	632	16131	0.0534805	0.00708674	0.100017
GO:0007507	heart development	biological_process	multicellular organismal process	43	1064	392	14236	0.0404135	0.00714749	0.100398
GO:0031234	extrinsic component of cytoplasmic side of plasma membrane	cellular_component	cell	15	1230	105	17330	0.0121951	0.00715095	0.100398
GO:0032989	cellular component morphogenesis	biological_process	cellular component organization or biogenesis	66	1064	653	14236	0.0620301	0.00712896	0.100398
GO:0010038	response to metal ion	biological_process	response to stimulus	28	1064	230	14236	0.0263158	0.0071834	0.100545
GO:1900077	negative regulation of cellular response to insulin stimulus	biological_process	biological regulation	6	1064	24	14236	0.0056391	0.00718623	0.100545
GO:0002702	positive regulation of production of molecular mediator of immune response	biological_process	biological regulation	9	1064	47	14236	0.00845865	0.00723619	0.100896
GO:0097530	granulocyte migration	biological_process	cellular process	9	1064	47	14236	0.00845865	0.00723619	0.100896
GO:0032970	regulation of actin filament-based process	biological_process	biological regulation	25	1064	199	14236	0.0234962	0.00725787	0.101024
GO:0032994	protein-lipid complex	cellular_component	macromolecular complex	8	1230	41	17330	0.00650407	0.00733408	0.101843
GO:0048145	regulation of fibroblast proliferation	biological_process	biological regulation	11	1064	64	14236	0.0103383	0.00734188	0.101843
GO:0045807	positive regulation of endocytosis	biological_process	biological regulation	12	1064	73	14236	0.0112782	0.00751401	0.104053
GO:0098802	plasma membrane receptor complex	cellular_component	cell	22	1230	178	17330	0.0178862	0.00774172	0.107023
GO:0046332	SMAD binding	molecular_function	binding	12	1178	75	16131	0.0101868	0.00782347	0.107969
GO:0031334	positive regulation of protein complex assembly	biological_process	biological regulation	15	1064	101	14236	0.0140977	0.00788388	0.10825
GO:0035102	PRC1 complex	cellular_component	organelle part	4	1230	12	17330	0.00325203	0.00787831	0.10825
GO:0090101	negative regulation of transmembrane receptor protein serine/threonine kinase signaling pathway	biological_process	biological regulation	15	1064	101	14236	0.0140977	0.00788388	0.10825
GO:0090183	regulation of kidney development	biological_process	biological regulation	10	1064	56	14236	0.0093985	0.00790306	0.108329
GO:0045785	positive regulation of cell adhesion	biological_process	biological regulation	33	1064	285	14236	0.031015	0.00795698	0.108884
GO:0008081	phosphoric diester hydrolase activity	molecular_function	catalytic activity	14	1178	94	16131	0.0118846	0.00810593	0.110735
GO:0006954	inflammatory response	biological_process	response to stimulus	38	1064	340	14236	0.0357143	0.0082194	0.111908
GO:1903827	regulation of cellular protein localization	biological_process	biological regulation	25	1064	201	14236	0.0234962	0.00821674	0.111908
GO:0001892	embryonic placenta development	biological_process	multicellular organismal process	13	1064	83	14236	0.012218	0.00832227	0.113119
GO:0000790	nuclear chromatin	cellular_component	organelle part	36	1230	335	17330	0.0292683	0.008427	0.11435
GO:0002699	positive regulation of immune effector process	biological_process	biological regulation	17	1064	121	14236	0.0159774	0.00849706	0.114916
GO:0005719	nuclear euchromatin	cellular_component	organelle part	6	1230	26	17330	0.00487805	0.00848531	0.114916
GO:0051050	positive regulation of transport	biological_process	biological regulation	53	1064	509	14236	0.049812	0.00859989	0.116113
GO:0003206	cardiac chamber morphogenesis	biological_process	multicellular organismal process	15	1064	102	14236	0.0140977	0.00862381	0.116242
GO:0031670	cellular response to nutrient	biological_process	cellular process	5	1064	18	14236	0.00469925	0.00870429	0.116938
GO:0042659	regulation of cell fate specification	biological_process	biological regulation	5	1064	18	14236	0.00469925	0.00870429	0.116938
GO:0043516	regulation of DNA damage response, signal transduction by p53 class mediator	biological_process	biological regulation	6	1064	25	14236	0.0056391	0.00886947	0.118763
GO:1901796	regulation of signal transduction by p53 class mediator	biological_process	biological regulation	6	1064	25	14236	0.0056391	0.00886947	0.118763
GO:0001525	angiogenesis	biological_process	multicellular organismal process	28	1064	234	14236	0.0263158	0.00901957	0.120573
GO:0048568	embryonic organ development	biological_process	multicellular organismal process	43	1064	398	14236	0.0404135	0.00923903	0.123304
GO:0001704	formation of primary germ layer	biological_process	multicellular organismal process	12	1064	75	14236	0.0112782	0.00931254	0.123596
GO:0002573	myeloid leukocyte differentiation	biological_process	cellular process	12	1064	75	14236	0.0112782	0.00931254	0.123596
GO:0015629	actin cytoskeleton	cellular_component	cell	46	1230	454	17330	0.0373984	0.00932082	0.123596
GO:0016024	CDP-diacylglycerol biosynthetic process	biological_process	cellular process	4	1064	12	14236	0.0037594	0.00944399	0.123596
GO:0031589	cell-substrate adhesion	biological_process	biological adhesion	18	1064	132	14236	0.0169173	0.00934787	0.123596
GO:0044319	wound healing, spreading of cells	biological_process	cellular process	4	1064	12	14236	0.0037594	0.00944399	0.123596
GO:0050670	regulation of lymphocyte proliferation	biological_process	biological regulation	20	1064	152	14236	0.018797	0.00940432	0.123596
GO:0050775	positive regulation of dendrite morphogenesis	biological_process	biological regulation	4	1064	12	14236	0.0037594	0.00944399	0.123596
GO:0090049	regulation of cell migration involved in sprouting angiogenesis	biological_process	biological regulation	4	1064	12	14236	0.0037594	0.00944399	0.123596
GO:0090504	epiboly	biological_process	developmental process	4	1064	12	14236	0.0037594	0.00944399	0.123596
GO:0090505	epiboly involved in wound healing	biological_process	response to stimulus	4	1064	12	14236	0.0037594	0.00944399	0.123596
GO:1903670	regulation of sprouting angiogenesis	biological_process	biological regulation	4	1064	12	14236	0.0037594	0.00944399	0.123596
GO:0005925	focal adhesion	cellular_component	cell junction	41	1230	396	17330	0.0333333	0.00961995	0.125493
GO:0007399	nervous system development	biological_process	multicellular organismal process	157	1064	1764	14236	0.147556	0.00961821	0.125493
GO:0031349	positive regulation of defense response	biological_process	biological regulation	29	1064	246	14236	0.0272556	0.00972905	0.126712
GO:0045058	T cell selection	biological_process	cellular process	7	1064	33	14236	0.00657895	0.00977264	0.127076
GO:0045766	positive regulation of angiogenesis	biological_process	biological regulation	14	1064	94	14236	0.0131579	0.00981469	0.127418
GO:0060337	type I interferon signaling pathway	biological_process	biological regulation	8	1064	41	14236	0.0075188	0.0098865	0.127736
GO:0071357	cellular response to type I interferon	biological_process	cellular process	8	1064	41	14236	0.0075188	0.0098865	0.127736
GO:1903725	regulation of phospholipid metabolic process	biological_process	biological regulation	8	1064	41	14236	0.0075188	0.0098865	0.127736
GO:0030331	estrogen receptor binding	molecular_function	binding	8	1178	42	16131	0.00679117	0.0100261	0.129333
GO:0032944	regulation of mononuclear cell proliferation	biological_process	biological regulation	20	1064	153	14236	0.018797	0.0100835	0.129867
GO:0046578	regulation of Ras protein signal transduction	biological_process	biological regulation	19	1064	143	14236	0.0178571	0.0101155	0.129867
GO:0065004	protein-DNA complex assembly	biological_process	cellular component organization or biogenesis	19	1064	143	14236	0.0178571	0.0101155	0.129867
GO:0044093	positive regulation of molecular function	biological_process	biological regulation	100	1064	1068	14236	0.093985	0.0101754	0.130429
GO:0006979	response to oxidative stress	biological_process	response to stimulus	29	1064	247	14236	0.0272556	0.0102633	0.131207
GO:0050671	positive regulation of lymphocyte proliferation	biological_process	biological regulation	15	1064	104	14236	0.0140977	0.0102685	0.131207
GO:0006366	transcription from RNA polymerase II promoter	biological_process	cellular process	38	1064	345	14236	0.0357143	0.0103116	0.13155
GO:0051897	positive regulation of protein kinase B signaling	biological_process	biological regulation	11	1064	67	14236	0.0103383	0.0103502	0.131835
GO:0099512	supramolecular fiber	cellular_component	supramolecular complex	81	1230	885	17330	0.0658537	0.010556	0.134245
GO:0004879	nuclear receptor activity	molecular_function	signal transducer activity	9	1178	51	16131	0.00764007	0.0107428	0.135981
GO:0044089	positive regulation of cellular component biogenesis	biological_process	biological regulation	24	1064	195	14236	0.0225564	0.0107249	0.135981
GO:0098531	transcription factor activity, direct ligand regulated sequence-specific DNA binding	molecular_function	transcription regulator activity	9	1178	51	16131	0.00764007	0.0107428	0.135981
GO:0010470	regulation of gastrulation	biological_process	biological regulation	6	1064	26	14236	0.0056391	0.0108169	0.136068
GO:0042036	negative regulation of cytokine biosynthetic process	biological_process	biological regulation	6	1064	26	14236	0.0056391	0.0108169	0.136068
GO:0042771	intrinsic apoptotic signaling pathway in response to DNA damage by p53 class mediator	biological_process	biological regulation	6	1064	26	14236	0.0056391	0.0108169	0.136068
GO:0045124	regulation of bone resorption	biological_process	biological regulation	6	1064	26	14236	0.0056391	0.0108169	0.136068
GO:0005924	cell-substrate adherens junction	cellular_component	cell junction	41	1230	399	17330	0.0333333	0.0108523	0.136145
GO:0008532	N-acetyllactosaminide beta-1,3-N-acetylglucosaminyltransferase activity	molecular_function	catalytic activity	3	1178	7	16131	0.00254669	0.0108757	0.136145
GO:0030509	BMP signaling pathway	biological_process	biological regulation	9	1064	50	14236	0.00845865	0.0108903	0.136145
GO:0097322	7SK snRNA binding	molecular_function	binding	3	1178	7	16131	0.00254669	0.0108757	0.136145
GO:0019216	regulation of lipid metabolic process	biological_process	biological regulation	27	1064	227	14236	0.0253759	0.0110068	0.13739
GO:0002686	negative regulation of leukocyte migration	biological_process	biological regulation	5	1064	19	14236	0.00469925	0.0110993	0.137886
GO:0035091	phosphatidylinositol binding	molecular_function	binding	24	1178	200	16131	0.0203735	0.0111147	0.137886
GO:0036314	response to sterol	biological_process	response to stimulus	5	1064	19	14236	0.00469925	0.0110993	0.137886
GO:0043368	positive T cell selection	biological_process	cellular process	5	1064	19	14236	0.00469925	0.0110993	0.137886
GO:0010921	regulation of phosphatase activity	biological_process	biological regulation	13	1064	86	14236	0.012218	0.0111448	0.138045
GO:0032946	positive regulation of mononuclear cell proliferation	biological_process	biological regulation	15	1064	105	14236	0.0140977	0.0111786	0.138045
GO:0051495	positive regulation of cytoskeleton organization	biological_process	biological regulation	15	1064	105	14236	0.0140977	0.0111786	0.138045
GO:0001774	microglial cell activation	biological_process	cellular process	3	1064	7	14236	0.00281955	0.0115946	0.138129
GO:0001936	regulation of endothelial cell proliferation	biological_process	biological regulation	12	1064	77	14236	0.0112782	0.011429	0.138129
GO:0002138	retinoic acid biosynthetic process	biological_process	biological regulation	3	1064	7	14236	0.00281955	0.0115946	0.138129
GO:0002606	positive regulation of dendritic cell antigen processing and presentation	biological_process	biological regulation	3	1064	7	14236	0.00281955	0.0115946	0.138129
GO:0003307	regulation of Wnt signaling pathway involved in heart development	biological_process	biological regulation	3	1064	7	14236	0.00281955	0.0115946	0.138129
GO:0003705	transcription factor activity, RNA polymerase II distal enhancer sequence-specific binding	molecular_function	transcription regulator activity	14	1178	98	16131	0.0118846	0.0115896	0.138129
GO:0030168	platelet activation	biological_process	biological regulation	24	1064	196	14236	0.0225564	0.0113851	0.138129
GO:0032649	regulation of interferon-gamma production	biological_process	biological regulation	11	1064	68	14236	0.0103383	0.0115385	0.138129
GO:0032809	neuronal cell body membrane	cellular_component	cell	5	1230	20	17330	0.00406504	0.0112804	0.138129
GO:0034340	response to type I interferon	biological_process	response to stimulus	8	1064	42	14236	0.0075188	0.0114337	0.138129
GO:0036017	response to erythropoietin	biological_process	response to stimulus	3	1064	7	14236	0.00281955	0.0115946	0.138129
GO:0036018	cellular response to erythropoietin	biological_process	cellular process	3	1064	7	14236	0.00281955	0.0115946	0.138129
GO:0043535	regulation of blood vessel endothelial cell migration	biological_process	biological regulation	8	1064	42	14236	0.0075188	0.0114337	0.138129
GO:0044298	cell body membrane	cellular_component	cell	5	1230	20	17330	0.00406504	0.0112804	0.138129
GO:0045586	regulation of gamma-delta T cell differentiation	biological_process	biological regulation	3	1064	7	14236	0.00281955	0.0115946	0.138129
GO:0045588	positive regulation of gamma-delta T cell differentiation	biological_process	biological regulation	3	1064	7	14236	0.00281955	0.0115946	0.138129
GO:0045646	regulation of erythrocyte differentiation	biological_process	biological regulation	7	1064	34	14236	0.00657895	0.0115319	0.138129
GO:0045956	positive regulation of calcium ion-dependent exocytosis	biological_process	biological regulation	3	1064	7	14236	0.00281955	0.0115946	0.138129
GO:0051049	regulation of transport	biological_process	biological regulation	98	1064	1049	14236	0.0921053	0.0115663	0.138129
GO:0071586	CAAX-box protein processing	biological_process	cellular process	3	1064	7	14236	0.00281955	0.0115946	0.138129
GO:0072124	regulation of glomerular mesangial cell proliferation	biological_process	biological regulation	3	1064	7	14236	0.00281955	0.0115946	0.138129
GO:0080120	CAAX-box protein maturation	biological_process	cellular process	3	1064	7	14236	0.00281955	0.0115946	0.138129
GO:1900245	positive regulation of MDA-5 signaling pathway	biological_process	biological regulation	3	1064	7	14236	0.00281955	0.0115946	0.138129
GO:1905114	cell surface receptor signaling pathway involved in cell-cell signaling	biological_process	biological regulation	24	1064	196	14236	0.0225564	0.0113851	0.138129
GO:0007369	gastrulation	biological_process	multicellular organismal process	17	1064	125	14236	0.0159774	0.0116242	0.138278
GO:0001221	transcription cofactor binding	molecular_function	binding	6	1178	27	16131	0.00509338	0.0117267	0.139294
GO:0004861	cyclin-dependent protein serine/threonine kinase inhibitor activity	molecular_function	molecular function regulator	4	1178	13	16131	0.00339559	0.0118626	0.140701
GO:0045786	negative regulation of cell cycle	biological_process	biological regulation	48	1064	461	14236	0.0451128	0.0120002	0.142126
GO:0004896	cytokine receptor activity	molecular_function	signal transducer activity	13	1178	89	16131	0.0110357	0.0122924	0.145373
GO:0071396	cellular response to lipid	biological_process	cellular process	32	1064	283	14236	0.0300752	0.0123274	0.145575
GO:0044459	plasma membrane part	cellular_component	cell	211	1230	2581	17330	0.171545	0.0126346	0.148986
GO:0001649	osteoblast differentiation	biological_process	cellular process	10	1064	60	14236	0.0093985	0.0127849	0.149092
GO:0006915	apoptotic process	biological_process	cellular process	60	1064	601	14236	0.056391	0.0127531	0.149092
GO:0009299	mRNA transcription	biological_process	cellular process	4	1064	13	14236	0.0037594	0.0128461	0.149092
GO:0009649	entrainment of circadian clock	biological_process	biological regulation	4	1064	13	14236	0.0037594	0.0128461	0.149092
GO:0010923	negative regulation of phosphatase activity	biological_process	biological regulation	10	1064	60	14236	0.0093985	0.0127849	0.149092
GO:0030055	cell-substrate junction	cellular_component	cell junction	41	1230	403	17330	0.0333333	0.0126953	0.149092
GO:0033137	negative regulation of peptidyl-serine phosphorylation	biological_process	biological regulation	4	1064	13	14236	0.0037594	0.0128461	0.149092
GO:0043900	regulation of multi-organism process	biological_process	biological regulation	26	1064	219	14236	0.0244361	0.0127114	0.149092
GO:0046341	CDP-diacylglycerol metabolic process	biological_process	cellular process	4	1064	13	14236	0.0037594	0.0128461	0.149092
GO:0099081	supramolecular polymer	cellular_component	supramolecular complex	81	1230	892	17330	0.0658537	0.0126728	0.149092
GO:1903707	negative regulation of hemopoiesis	biological_process	biological regulation	14	1064	97	14236	0.0131579	0.0128079	0.149092
GO:0001825	blastocyst formation	biological_process	multicellular organismal process	6	1064	27	14236	0.0056391	0.0130484	0.150559
GO:0003197	endocardial cushion development	biological_process	multicellular organismal process	6	1064	27	14236	0.0056391	0.0130484	0.150559
GO:0051345	positive regulation of hydrolase activity	biological_process	biological regulation	41	1064	384	14236	0.0385338	0.0130655	0.150559
GO:0060412	ventricular septum morphogenesis	biological_process	multicellular organismal process	6	1064	27	14236	0.0056391	0.0130484	0.150559
GO:0099080	supramolecular complex	cellular_component	supramolecular complex	81	1230	893	17330	0.0658537	0.0130024	0.150559
GO:0003007	heart morphogenesis	biological_process	multicellular organismal process	23	1064	188	14236	0.0216165	0.0131694	0.150899
GO:0031667	response to nutrient levels	biological_process	response to stimulus	28	1064	241	14236	0.0263158	0.0131496	0.150899
GO:0045682	regulation of epidermis development	biological_process	biological regulation	8	1064	43	14236	0.0075188	0.0131523	0.150899
GO:0060411	cardiac septum morphogenesis	biological_process	multicellular organismal process	8	1064	43	14236	0.0075188	0.0131523	0.150899
GO:0030029	actin filament-based process	biological_process	cellular process	39	1064	362	14236	0.0366541	0.0132904	0.15207
GO:0021915	neural tube development	biological_process	multicellular organismal process	19	1064	147	14236	0.0178571	0.0133754	0.152827
GO:0035019	somatic stem cell population maintenance	biological_process	multicellular organismal process	7	1064	35	14236	0.00657895	0.0135091	0.15296
GO:0035258	steroid hormone receptor binding	molecular_function	binding	13	1178	90	16131	0.0110357	0.0134377	0.15296
GO:0043167	ion binding	molecular_function	binding	480	1178	6079	16131	0.40747	0.0134428	0.15296
GO:0044464	cell part	cellular_component	cell	1137	1230	15713	17330	0.92439	0.0135193	0.15296
GO:0051055	negative regulation of lipid biosynthetic process	biological_process	biological regulation	7	1064	35	14236	0.00657895	0.0135091	0.15296
GO:0060828	regulation of canonical Wnt signaling pathway	biological_process	biological regulation	18	1064	137	14236	0.0169173	0.0134787	0.15296
GO:0072332	intrinsic apoptotic signaling pathway by p53 class mediator	biological_process	biological regulation	7	1064	35	14236	0.00657895	0.0135091	0.15296
GO:0001558	regulation of cell growth	biological_process	biological regulation	33	1064	296	14236	0.031015	0.013588	0.153524
GO:0050769	positive regulation of neurogenesis	biological_process	biological regulation	27	1064	231	14236	0.0253759	0.0136599	0.154121
GO:0007010	cytoskeleton organization	biological_process	cellular component organization or biogenesis	62	1064	627	14236	0.0582707	0.0138774	0.154967
GO:0007411	axon guidance	biological_process	cellular component organization or biogenesis	39	1064	363	14236	0.0366541	0.0138557	0.154967
GO:0031648	protein destabilization	biological_process	biological regulation	5	1064	20	14236	0.00469925	0.0139071	0.154967
GO:0032386	regulation of intracellular transport	biological_process	biological regulation	28	1064	242	14236	0.0263158	0.0138476	0.154967
GO:0042303	molting cycle	biological_process	multicellular organismal process	12	1064	79	14236	0.0112782	0.0138974	0.154967
GO:0042633	hair cycle	biological_process	multicellular organismal process	12	1064	79	14236	0.0112782	0.0138974	0.154967
GO:0045089	positive regulation of innate immune response	biological_process	biological regulation	21	1064	168	14236	0.0197368	0.0138227	0.154967
GO:0072215	regulation of metanephros development	biological_process	biological regulation	5	1064	20	14236	0.00469925	0.0139071	0.154967
GO:0097485	neuron projection guidance	biological_process	cellular component organization or biogenesis	39	1064	363	14236	0.0366541	0.0138557	0.154967
GO:0009897	external side of plasma membrane	cellular_component	cell	25	1230	221	17330	0.0203252	0.0140577	0.15643
GO:0033043	regulation of organelle organization	biological_process	biological regulation	58	1064	581	14236	0.0545113	0.0141839	0.157618
GO:0003279	cardiac septum development	biological_process	multicellular organismal process	10	1064	61	14236	0.0093985	0.0142989	0.158245
GO:0045619	regulation of lymphocyte differentiation	biological_process	biological regulation	15	1064	108	14236	0.0140977	0.0142919	0.158245
GO:0070665	positive regulation of leukocyte proliferation	biological_process	biological regulation	15	1064	108	14236	0.0140977	0.0142919	0.158245
GO:0035838	growing cell tip	cellular_component	cell	2	1230	3	17330	0.00162602	0.0143876	0.158792
GO:1990597	AIP1-IRE1 complex	cellular_component	macromolecular complex	2	1230	3	17330	0.00162602	0.0143876	0.158792
GO:0001569	branching involved in blood vessel morphogenesis	biological_process	multicellular organismal process	7	1064	36	14236	0.00657895	0.0157178	0.160715
GO:0003104	positive regulation of glomerular filtration	biological_process	biological regulation	2	1064	3	14236	0.0018797	0.0159108	0.160715
GO:0003129	heart induction	biological_process	biological regulation	2	1064	3	14236	0.0018797	0.0159108	0.160715
GO:0003130	BMP signaling pathway involved in heart induction	biological_process	biological regulation	2	1064	3	14236	0.0018797	0.0159108	0.160715
GO:0003133	endodermal-mesodermal cell signaling	biological_process	cellular process	2	1064	3	14236	0.0018797	0.0159108	0.160715
GO:0003134	endodermal-mesodermal cell signaling involved in heart induction	biological_process	biological regulation	2	1064	3	14236	0.0018797	0.0159108	0.160715
GO:0003158	endothelium development	biological_process	developmental process	9	1064	53	14236	0.00845865	0.0157777	0.160715
GO:0004803	transposase activity	molecular_function	catalytic activity	2	1178	3	16131	0.00169779	0.0152092	0.160715
GO:0006313	transposition, DNA-mediated	biological_process	cellular process	2	1064	3	14236	0.0018797	0.0159108	0.160715
GO:0007044	cell-substrate junction assembly	biological_process	cellular component organization or biogenesis	7	1064	36	14236	0.00657895	0.0157178	0.160715
GO:0008321	Ral guanyl-nucleotide exchange factor activity	molecular_function	molecular function regulator	2	1178	3	16131	0.00169779	0.0152092	0.160715
GO:0009267	cellular response to starvation	biological_process	cellular process	8	1064	44	14236	0.0075188	0.0150522	0.160715
GO:0010511	regulation of phosphatidylinositol biosynthetic process	biological_process	biological regulation	2	1064	3	14236	0.0018797	0.0159108	0.160715
GO:0010976	positive regulation of neuron projection development	biological_process	biological regulation	15	1064	109	14236	0.0140977	0.0154666	0.160715
GO:0012501	programmed cell death	biological_process	cellular process	61	1064	617	14236	0.0573308	0.0146359	0.160715
GO:0019221	cytokine-mediated signaling pathway	biological_process	biological regulation	31	1064	276	14236	0.0291353	0.0148663	0.160715
GO:0030229	very-low-density lipoprotein particle receptor activity	molecular_function	molecular transducer activity	2	1178	3	16131	0.00169779	0.0152092	0.160715
GO:0032196	transposition	biological_process	cellular process	2	1064	3	14236	0.0018797	0.0159108	0.160715
GO:0032480	negative regulation of type I interferon production	biological_process	biological regulation	7	1064	36	14236	0.00657895	0.0157178	0.160715
GO:0032641	lymphotoxin A production	biological_process	multicellular organismal process	2	1064	3	14236	0.0018797	0.0159108	0.160715
GO:0032663	regulation of interleukin-2 production	biological_process	biological regulation	8	1064	44	14236	0.0075188	0.0150522	0.160715
GO:0034144	negative regulation of toll-like receptor 4 signaling pathway	biological_process	biological regulation	2	1064	3	14236	0.0018797	0.0159108	0.160715
GO:0035054	embryonic heart tube anterior/posterior pattern specification	biological_process	multicellular organismal process	2	1064	3	14236	0.0018797	0.0159108	0.160715
GO:0035403	histone kinase activity (H3-T6 specific)	molecular_function	catalytic activity	2	1178	3	16131	0.00169779	0.0152092	0.160715
GO:0035408	histone H3-T6 phosphorylation	biological_process	cellular component organization or biogenesis	2	1064	3	14236	0.0018797	0.0159108	0.160715
GO:0035411	catenin import into nucleus	biological_process	localization	2	1064	3	14236	0.0018797	0.0159108	0.160715
GO:0035767	endothelial cell chemotaxis	biological_process	cellular process	2	1064	3	14236	0.0018797	0.0159108	0.160715
GO:0035793	positive regulation of metanephric mesenchymal cell migration by platelet-derived growth factor receptor-beta signaling pathway	biological_process	biological regulation	2	1064	3	14236	0.0018797	0.0159108	0.160715
GO:0038026	reelin-mediated signaling pathway	biological_process	biological regulation	2	1064	3	14236	0.0018797	0.0159108	0.160715
GO:0042109	lymphotoxin A biosynthetic process	biological_process	multicellular organismal process	2	1064	3	14236	0.0018797	0.0159108	0.160715
GO:0042551	neuron maturation	biological_process	cellular process	6	1064	28	14236	0.0056391	0.0155832	0.160715
GO:0042997	negative regulation of Golgi to plasma membrane protein transport	biological_process	biological regulation	2	1064	3	14236	0.0018797	0.0159108	0.160715
GO:0043085	positive regulation of catalytic activity	biological_process	biological regulation	82	1064	867	14236	0.0770677	0.015107	0.160715
GO:0043254	regulation of protein complex assembly	biological_process	biological regulation	24	1064	201	14236	0.0225564	0.0151934	0.160715
GO:0043588	skin development	biological_process	multicellular organismal process	23	1064	190	14236	0.0216165	0.014811	0.160715
GO:0043621	protein self-association	molecular_function	binding	8	1178	45	16131	0.00679117	0.0150986	0.160715
GO:0044026	DNA hypermethylation	biological_process	biological regulation	2	1064	3	14236	0.0018797	0.0159108	0.160715
GO:0044027	hypermethylation of CpG island	biological_process	biological regulation	2	1064	3	14236	0.0018797	0.0159108	0.160715
GO:0044092	negative regulation of molecular function	biological_process	biological regulation	69	1064	711	14236	0.0648496	0.0145956	0.160715
GO:0045082	positive regulation of interleukin-10 biosynthetic process	biological_process	biological regulation	2	1064	3	14236	0.0018797	0.0159108	0.160715
GO:0048627	myoblast development	biological_process	cellular process	2	1064	3	14236	0.0018797	0.0159108	0.160715
GO:0051718	DNA (cytosine-5-)-methyltransferase activity, acting on CpG substrates	molecular_function	catalytic activity	2	1178	3	16131	0.00169779	0.0152092	0.160715
GO:0055118	negative regulation of cardiac muscle contraction	biological_process	biological regulation	2	1064	3	14236	0.0018797	0.0159108	0.160715
GO:0060099	regulation of phagocytosis, engulfment	biological_process	biological regulation	2	1064	3	14236	0.0018797	0.0159108	0.160715
GO:0060100	positive regulation of phagocytosis, engulfment	biological_process	biological regulation	2	1064	3	14236	0.0018797	0.0159108	0.160715
GO:0060149	negative regulation of posttranscriptional gene silencing	biological_process	biological regulation	2	1064	3	14236	0.0018797	0.0159108	0.160715
GO:0060279	positive regulation of ovulation	biological_process	biological regulation	2	1064	3	14236	0.0018797	0.0159108	0.160715
GO:0060341	regulation of cellular localization	biological_process	biological regulation	40	1064	377	14236	0.037594	0.0155082	0.160715
GO:0060965	negative regulation of gene silencing by miRNA	biological_process	biological regulation	2	1064	3	14236	0.0018797	0.0159108	0.160715
GO:0060967	negative regulation of gene silencing by RNA	biological_process	biological regulation	2	1064	3	14236	0.0018797	0.0159108	0.160715
GO:0061515	myeloid cell development	biological_process	cellular process	6	1064	28	14236	0.0056391	0.0155832	0.160715
GO:0070696	transmembrane receptor protein serine/threonine kinase binding	molecular_function	binding	4	1178	14	16131	0.00339559	0.0156636	0.160715
GO:0071505	response to mycophenolic acid	biological_process	response to stimulus	2	1064	3	14236	0.0018797	0.0159108	0.160715
GO:0071506	cellular response to mycophenolic acid	biological_process	cellular process	2	1064	3	14236	0.0018797	0.0159108	0.160715
GO:0071706	tumor necrosis factor superfamily cytokine production	biological_process	multicellular organismal process	2	1064	3	14236	0.0018797	0.0159108	0.160715
GO:0072126	positive regulation of glomerular mesangial cell proliferation	biological_process	biological regulation	2	1064	3	14236	0.0018797	0.0159108	0.160715
GO:0090081	regulation of heart induction by regulation of canonical Wnt signaling pathway	biological_process	biological regulation	2	1064	3	14236	0.0018797	0.0159108	0.160715
GO:0090289	regulation of osteoclast proliferation	biological_process	biological regulation	2	1064	3	14236	0.0018797	0.0159108	0.160715
GO:1900238	regulation of metanephric mesenchymal cell migration by platelet-derived growth factor receptor-beta signaling pathway	biological_process	biological regulation	2	1064	3	14236	0.0018797	0.0159108	0.160715
GO:1903077	negative regulation of protein localization to plasma membrane	biological_process	biological regulation	2	1064	3	14236	0.0018797	0.0159108	0.160715
GO:1904376	negative regulation of protein localization to cell periphery	biological_process	biological regulation	2	1064	3	14236	0.0018797	0.0159108	0.160715
GO:1905153	regulation of membrane invagination	biological_process	biological regulation	2	1064	3	14236	0.0018797	0.0159108	0.160715
GO:1905155	positive regulation of membrane invagination	biological_process	biological regulation	2	1064	3	14236	0.0018797	0.0159108	0.160715
GO:1905268	negative regulation of chromatin organization	biological_process	biological regulation	7	1064	36	14236	0.00657895	0.0157178	0.160715
GO:2000591	positive regulation of metanephric mesenchymal cell migration	biological_process	biological regulation	2	1064	3	14236	0.0018797	0.0159108	0.160715
GO:2001070	starch binding	molecular_function	binding	2	1178	3	16131	0.00169779	0.0152092	0.160715
GO:2001169	regulation of ATP biosynthetic process	biological_process	biological regulation	2	1064	3	14236	0.0018797	0.0159108	0.160715
GO:2001181	positive regulation of interleukin-10 secretion	biological_process	biological regulation	2	1064	3	14236	0.0018797	0.0159108	0.160715
GO:0007623	circadian rhythm	biological_process	rhythmic process	10	1064	62	14236	0.0093985	0.015943	0.16084
GO:0051592	response to calcium ion	biological_process	response to stimulus	13	1064	90	14236	0.012218	0.016001	0.161224
GO:0004726	non-membrane spanning protein tyrosine phosphatase activity	molecular_function	catalytic activity	3	1178	8	16131	0.00254669	0.0164651	0.163862
GO:0005113	patched binding	molecular_function	binding	3	1178	8	16131	0.00254669	0.0164651	0.163862
GO:0008440	inositol-1,4,5-trisphosphate 3-kinase activity	molecular_function	catalytic activity	3	1178	8	16131	0.00254669	0.0164651	0.163862
GO:0008654	phospholipid biosynthetic process	biological_process	cellular process	25	1064	213	14236	0.0234962	0.0163705	0.163862
GO:0014074	response to purine-containing compound	biological_process	response to stimulus	14	1064	100	14236	0.0131579	0.0164641	0.163862
GO:0015232	heme transporter activity	molecular_function	transporter activity	3	1178	8	16131	0.00254669	0.0164651	0.163862
GO:0017015	regulation of transforming growth factor beta receptor signaling pathway	biological_process	biological regulation	14	1064	100	14236	0.0131579	0.0164641	0.163862
GO:0019957	C-C chemokine binding	molecular_function	binding	3	1178	8	16131	0.00254669	0.0164651	0.163862
GO:0055056	D-glucose transmembrane transporter activity	molecular_function	transporter activity	3	1178	8	16131	0.00254669	0.0164651	0.163862
GO:1903844	regulation of cellular response to transforming growth factor beta stimulus	biological_process	biological regulation	14	1064	100	14236	0.0131579	0.0164641	0.163862
GO:0000785	chromatin	cellular_component	organelle part	46	1230	470	17330	0.0373984	0.0166028	0.16503
GO:0003205	cardiac chamber development	biological_process	multicellular organismal process	16	1064	120	14236	0.0150376	0.016794	0.166725
GO:0019369	arachidonic acid metabolic process	biological_process	cellular process	4	1064	14	14236	0.0037594	0.0169393	0.167144
GO:0031664	regulation of lipopolysaccharide-mediated signaling pathway	biological_process	biological regulation	4	1064	14	14236	0.0037594	0.0169393	0.167144
GO:0032555	purine ribonucleotide binding	molecular_function	binding	158	1178	1846	16131	0.134126	0.0169215	0.167144
GO:0034104	negative regulation of tissue remodeling	biological_process	biological regulation	4	1064	14	14236	0.0037594	0.0169393	0.167144
GO:0071294	cellular response to zinc ion	biological_process	cellular process	4	1064	14	14236	0.0037594	0.0169393	0.167144
GO:0006636	unsaturated fatty acid biosynthetic process	biological_process	cellular process	5	1064	21	14236	0.00469925	0.0171553	0.167324
GO:0008305	integrin complex	cellular_component	cell	6	1230	30	17330	0.00487805	0.0171847	0.167324
GO:0017076	purine nucleotide binding	molecular_function	binding	159	1178	1859	16131	0.134975	0.016986	0.167324
GO:0031344	regulation of cell projection organization	biological_process	biological regulation	30	1064	268	14236	0.0281955	0.0170901	0.167324
GO:0032755	positive regulation of interleukin-6 production	biological_process	biological regulation	8	1064	45	14236	0.0075188	0.0171436	0.167324
GO:0036230	granulocyte activation	biological_process	cellular process	5	1064	21	14236	0.00469925	0.0171553	0.167324
GO:0045076	regulation of interleukin-2 biosynthetic process	biological_process	biological regulation	5	1064	21	14236	0.00469925	0.0171553	0.167324
GO:0048557	embryonic digestive tract morphogenesis	biological_process	multicellular organismal process	5	1064	21	14236	0.00469925	0.0171553	0.167324
GO:0060760	positive regulation of response to cytokine stimulus	biological_process	biological regulation	5	1064	21	14236	0.00469925	0.0171553	0.167324
GO:0090184	positive regulation of kidney development	biological_process	biological regulation	8	1064	45	14236	0.0075188	0.0171436	0.167324
GO:0098636	protein complex involved in cell adhesion	cellular_component	macromolecular complex	6	1230	30	17330	0.00487805	0.0171847	0.167324
GO:0002604	regulation of dendritic cell antigen processing and presentation	biological_process	biological regulation	3	1064	8	14236	0.00281955	0.0175307	0.168066
GO:0010985	negative regulation of lipoprotein particle clearance	biological_process	biological regulation	3	1064	8	14236	0.00281955	0.0175307	0.168066
GO:0016102	diterpenoid biosynthetic process	biological_process	cellular process	3	1064	8	14236	0.00281955	0.0175307	0.168066
GO:0031348	negative regulation of defense response	biological_process	biological regulation	13	1064	91	14236	0.012218	0.0174344	0.168066
GO:0034370	triglyceride-rich lipoprotein particle remodeling	biological_process	cellular component organization or biogenesis	3	1064	8	14236	0.00281955	0.0175307	0.168066
GO:0039533	regulation of MDA-5 signaling pathway	biological_process	biological regulation	3	1064	8	14236	0.00281955	0.0175307	0.168066
GO:0045217	cell-cell junction maintenance	biological_process	cellular component organization or biogenesis	3	1064	8	14236	0.00281955	0.0175307	0.168066
GO:0045647	negative regulation of erythrocyte differentiation	biological_process	biological regulation	3	1064	8	14236	0.00281955	0.0175307	0.168066
GO:0060426	lung vasculature development	biological_process	multicellular organismal process	3	1064	8	14236	0.00281955	0.0175307	0.168066
GO:0061028	establishment of endothelial barrier	biological_process	cellular process	3	1064	8	14236	0.00281955	0.0175307	0.168066
GO:0097367	carbohydrate derivative binding	molecular_function	binding	181	1178	2143	16131	0.15365	0.0174672	0.168066
GO:1900246	positive regulation of RIG-I signaling pathway	biological_process	biological regulation	3	1064	8	14236	0.00281955	0.0175307	0.168066
GO:1903828	negative regulation of cellular protein localization	biological_process	biological regulation	11	1064	72	14236	0.0103383	0.0173568	0.168066
GO:0005856	cytoskeleton	cellular_component	cell	165	1230	1993	17330	0.134146	0.0177174	0.169275
GO:0021766	hippocampus development	biological_process	multicellular organismal process	9	1064	54	14236	0.00845865	0.0177174	0.169275
GO:0035966	response to topologically incorrect protein	biological_process	response to stimulus	18	1064	141	14236	0.0169173	0.0177195	0.169275
GO:0050727	regulation of inflammatory response	biological_process	biological regulation	24	1064	204	14236	0.0225564	0.0179247	0.170833
GO:0051347	positive regulation of transferase activity	biological_process	biological regulation	53	1064	530	14236	0.049812	0.0179183	0.170833
GO:0051092	positive regulation of NF-kappaB transcription factor activity	biological_process	biological regulation	15	1064	111	14236	0.0140977	0.0180378	0.171709
GO:0048666	neuron development	biological_process	cellular process	66	1064	683	14236	0.0620301	0.0181295	0.172379
GO:0009725	response to hormone	biological_process	response to stimulus	62	1064	636	14236	0.0582707	0.0182654	0.173468
GO:0002011	morphogenesis of an epithelial sheet	biological_process	developmental process	6	1064	29	14236	0.0056391	0.0184393	0.173694
GO:0002274	myeloid leukocyte activation	biological_process	cellular process	12	1064	82	14236	0.0112782	0.018335	0.173694
GO:0003230	cardiac atrium development	biological_process	multicellular organismal process	6	1064	29	14236	0.0056391	0.0184393	0.173694
GO:0031057	negative regulation of histone modification	biological_process	biological regulation	6	1064	29	14236	0.0056391	0.0184393	0.173694
GO:0043502	regulation of muscle adaptation	biological_process	biological regulation	6	1064	29	14236	0.0056391	0.0184393	0.173694
GO:0045923	positive regulation of fatty acid metabolic process	biological_process	biological regulation	6	1064	29	14236	0.0056391	0.0184393	0.173694
GO:0071248	cellular response to metal ion	biological_process	cellular process	12	1064	82	14236	0.0112782	0.018335	0.173694
GO:0004712	protein serine/threonine/tyrosine kinase activity	molecular_function	catalytic activity	7	1178	38	16131	0.00594228	0.018628	0.175267
GO:0052813	phosphatidylinositol bisphosphate kinase activity	molecular_function	catalytic activity	10	1178	65	16131	0.00848896	0.0188133	0.176806
GO:0031346	positive regulation of cell projection organization	biological_process	biological regulation	18	1064	142	14236	0.0169173	0.0189258	0.177593
GO:0071453	cellular response to oxygen levels	biological_process	cellular process	13	1064	92	14236	0.012218	0.0189629	0.177593
GO:1902905	positive regulation of supramolecular fiber organization	biological_process	biological regulation	13	1064	92	14236	0.012218	0.0189629	0.177593
GO:0019956	chemokine binding	molecular_function	binding	5	1178	22	16131	0.00424448	0.0190607	0.178097
GO:0051427	hormone receptor binding	molecular_function	binding	22	1178	188	16131	0.0186757	0.019055	0.178097
GO:0035639	purine ribonucleoside triphosphate binding	molecular_function	binding	154	1178	1802	16131	0.13073	0.0191914	0.179113
GO:0002703	regulation of leukocyte mediated immunity	biological_process	biological regulation	14	1064	102	14236	0.0131579	0.0193117	0.180028
GO:0010720	positive regulation of cell development	biological_process	biological regulation	28	1064	249	14236	0.0263158	0.0196075	0.182575
GO:0042058	regulation of epidermal growth factor receptor signaling pathway	biological_process	biological regulation	10	1064	64	14236	0.0093985	0.0196457	0.182721
GO:0006468	protein phosphorylation	biological_process	cellular process	56	1064	568	14236	0.0526316	0.0197123	0.18313
GO:0000904	cell morphogenesis involved in differentiation	biological_process	cellular component organization or biogenesis	53	1064	533	14236	0.049812	0.019752	0.183288
GO:0030427	site of polarized growth	cellular_component	cell	18	1230	150	17330	0.0146341	0.0197771	0.183311
GO:0007492	endoderm development	biological_process	developmental process	9	1064	55	14236	0.00845865	0.0198251	0.183337
GO:0031214	biomineral tissue development	biological_process	multicellular organismal process	9	1064	55	14236	0.00845865	0.0198251	0.183337
GO:0030030	cell projection organization	biological_process	cellular component organization or biogenesis	69	1064	722	14236	0.0648496	0.0199352	0.184145
GO:0031056	regulation of histone modification	biological_process	biological regulation	12	1064	83	14236	0.0112782	0.0200273	0.184365
GO:0045580	regulation of T cell differentiation	biological_process	biological regulation	12	1064	83	14236	0.0112782	0.0200273	0.184365
GO:0045995	regulation of embryonic development	biological_process	biological regulation	12	1064	83	14236	0.0112782	0.0200273	0.184365
GO:0005542	folic acid binding	molecular_function	binding	4	1178	15	16131	0.00339559	0.0201489	0.184854
GO:0033612	receptor serine/threonine kinase binding	molecular_function	binding	4	1178	15	16131	0.00339559	0.0201489	0.184854
GO:0038191	neuropilin binding	molecular_function	binding	4	1178	15	16131	0.00339559	0.0201489	0.184854
GO:0030165	PDZ domain binding	molecular_function	binding	13	1178	95	16131	0.0110357	0.0204357	0.187273
GO:0001885	endothelial cell development	biological_process	cellular process	5	1064	22	14236	0.00469925	0.0208689	0.189425
GO:0002763	positive regulation of myeloid leukocyte differentiation	biological_process	biological regulation	7	1064	38	14236	0.00657895	0.0208809	0.189425
GO:0010043	response to zinc ion	biological_process	response to stimulus	7	1064	38	14236	0.00657895	0.0208809	0.189425
GO:0030178	negative regulation of Wnt signaling pathway	biological_process	biological regulation	16	1064	123	14236	0.0150376	0.0208046	0.189425
GO:0031063	regulation of histone deacetylation	biological_process	biological regulation	5	1064	22	14236	0.00469925	0.0208689	0.189425
GO:0046890	regulation of lipid biosynthetic process	biological_process	biological regulation	14	1064	103	14236	0.0131579	0.0208681	0.189425
GO:0060071	Wnt signaling pathway, planar cell polarity pathway	biological_process	biological regulation	5	1064	22	14236	0.00469925	0.0208689	0.189425
GO:0070536	protein K63-linked deubiquitination	biological_process	cellular process	5	1064	22	14236	0.00469925	0.0208689	0.189425
GO:1900076	regulation of cellular response to insulin stimulus	biological_process	biological regulation	7	1064	38	14236	0.00657895	0.0208809	0.189425
GO:0046872	metal ion binding	molecular_function	binding	329	1178	4095	16131	0.279287	0.0210108	0.190389
GO:0051336	regulation of hydrolase activity	biological_process	biological regulation	62	1064	641	14236	0.0582707	0.0211554	0.191486
GO:0005623	cell	cellular_component	cell	1137	1230	15739	17330	0.92439	0.0212524	0.192149
GO:0002902	regulation of B cell apoptotic process	biological_process	biological regulation	4	1064	15	14236	0.0037594	0.0217605	0.193724
GO:0006688	glycosphingolipid biosynthetic process	biological_process	cellular process	4	1064	15	14236	0.0037594	0.0217605	0.193724
GO:0008219	cell death	biological_process	cellular process	71	1064	749	14236	0.0667293	0.0217012	0.193724
GO:0010719	negative regulation of epithelial to mesenchymal transition	biological_process	biological regulation	4	1064	15	14236	0.0037594	0.0217605	0.193724
GO:0010984	regulation of lipoprotein particle clearance	biological_process	biological regulation	4	1064	15	14236	0.0037594	0.0217605	0.193724
GO:0016298	lipase activity	molecular_function	catalytic activity	15	1178	116	16131	0.0127334	0.0216013	0.193724
GO:0021795	cerebral cortex cell migration	biological_process	cellular process	6	1064	30	14236	0.0056391	0.0216334	0.193724
GO:0030855	epithelial cell differentiation	biological_process	cellular process	38	1064	363	14236	0.0357143	0.0217614	0.193724
GO:0035305	negative regulation of dephosphorylation	biological_process	biological regulation	10	1064	65	14236	0.0093985	0.0217164	0.193724
GO:0042475	odontogenesis of dentin-containing tooth	biological_process	multicellular organismal process	10	1064	65	14236	0.0093985	0.0217164	0.193724
GO:0045621	positive regulation of lymphocyte differentiation	biological_process	biological regulation	10	1064	65	14236	0.0093985	0.0217164	0.193724
GO:1901184	regulation of ERBB signaling pathway	biological_process	biological regulation	10	1064	65	14236	0.0093985	0.0217164	0.193724
GO:1901985	positive regulation of protein acetylation	biological_process	biological regulation	4	1064	15	14236	0.0037594	0.0217605	0.193724
GO:2000758	positive regulation of peptidyl-lysine acetylation	biological_process	biological regulation	4	1064	15	14236	0.0037594	0.0217605	0.193724
GO:0061035	regulation of cartilage development	biological_process	biological regulation	8	1064	47	14236	0.0075188	0.0219383	0.195085
GO:0032553	ribonucleotide binding	molecular_function	binding	158	1178	1862	16131	0.134126	0.0223168	0.198039
GO:0060759	regulation of response to cytokine stimulus	biological_process	biological regulation	13	1064	94	14236	0.012218	0.0223194	0.198039
GO:0006352	DNA-templated transcription, initiation	biological_process	cellular process	25	1064	219	14236	0.0234962	0.0223565	0.198151
GO:0007389	pattern specification process	biological_process	multicellular organismal process	43	1064	421	14236	0.0404135	0.0224769	0.199001
GO:0030217	T cell differentiation	biological_process	cellular process	14	1064	104	14236	0.0131579	0.0225169	0.199137
GO:0019898	extrinsic component of membrane	cellular_component	membrane part	28	1230	265	17330	0.0227642	0.0226006	0.19929
GO:0031625	ubiquitin protein ligase binding	molecular_function	binding	29	1178	269	16131	0.024618	0.022608	0.19929
GO:0120035	regulation of plasma membrane bounded cell projection organization	biological_process	biological regulation	29	1064	263	14236	0.0272556	0.0225664	0.19929
GO:0030278	regulation of ossification	biological_process	biological regulation	20	1064	166	14236	0.018797	0.0230103	0.202616
GO:0051766	inositol trisphosphate kinase activity	molecular_function	catalytic activity	3	1178	9	16131	0.00254669	0.0233745	0.205599
GO:0006986	response to unfolded protein	biological_process	response to stimulus	17	1064	135	14236	0.0159774	0.0234404	0.205955
GO:0004725	protein tyrosine phosphatase activity	molecular_function	catalytic activity	14	1178	107	16131	0.0118846	0.0236178	0.207084
GO:1902936	phosphatidylinositol bisphosphate binding	molecular_function	binding	11	1178	77	16131	0.00933786	0.02362	0.207084
GO:0010638	positive regulation of organelle organization	biological_process	biological regulation	27	1064	242	14236	0.0253759	0.023665	0.207254
GO:0036294	cellular response to decreased oxygen levels	biological_process	cellular process	12	1064	85	14236	0.0112782	0.0237566	0.207608
GO:0071456	cellular response to hypoxia	biological_process	cellular process	12	1064	85	14236	0.0112782	0.0237566	0.207608
GO:0005543	phospholipid binding	molecular_function	binding	37	1178	362	16131	0.0314092	0.0238116	0.207611
GO:0006334	nucleosome assembly	biological_process	cellular component organization or biogenesis	16	1064	125	14236	0.0150376	0.0238572	0.207611
GO:0032006	regulation of TOR signaling	biological_process	biological regulation	7	1064	39	14236	0.00657895	0.0238595	0.207611
GO:0038032	termination of G-protein coupled receptor signaling pathway	biological_process	biological regulation	7	1064	39	14236	0.00657895	0.0238595	0.207611
GO:0048812	neuron projection morphogenesis	biological_process	cellular component organization or biogenesis	48	1064	481	14236	0.0451128	0.0241934	0.210065
GO:0120039	plasma membrane bounded cell projection morphogenesis	biological_process	cellular component organization or biogenesis	48	1064	481	14236	0.0451128	0.0241934	0.210065
GO:0001942	hair follicle development	biological_process	multicellular organismal process	11	1064	76	14236	0.0103383	0.0251219	0.211332
GO:0002720	positive regulation of cytokine production involved in immune response	biological_process	biological regulation	5	1064	23	14236	0.00469925	0.0250695	0.211332
GO:0002903	negative regulation of B cell apoptotic process	biological_process	biological regulation	3	1064	9	14236	0.00281955	0.0248552	0.211332
GO:0003093	regulation of glomerular filtration	biological_process	biological regulation	3	1064	9	14236	0.00281955	0.0248552	0.211332
GO:0008299	isoprenoid biosynthetic process	biological_process	cellular process	5	1064	23	14236	0.00469925	0.0250695	0.211332
GO:0009629	response to gravity	biological_process	response to stimulus	3	1064	9	14236	0.00281955	0.0248552	0.211332
GO:0010243	response to organonitrogen compound	biological_process	response to stimulus	60	1064	623	14236	0.056391	0.0249195	0.211332
GO:0015074	DNA integration	biological_process	cellular process	3	1064	9	14236	0.00281955	0.0248552	0.211332
GO:0019897	extrinsic component of plasma membrane	cellular_component	cell	17	1230	143	17330	0.0138211	0.0250087	0.211332
GO:0022404	molting cycle process	biological_process	multicellular organismal process	11	1064	76	14236	0.0103383	0.0251219	0.211332
GO:0022405	hair cycle process	biological_process	multicellular organismal process	11	1064	76	14236	0.0103383	0.0251219	0.211332
GO:0031018	endocrine pancreas development	biological_process	multicellular organismal process	8	1064	48	14236	0.0075188	0.0246599	0.211332
GO:0031274	positive regulation of pseudopodium assembly	biological_process	biological regulation	3	1064	9	14236	0.00281955	0.0248552	0.211332
GO:0031953	negative regulation of protein autophosphorylation	biological_process	biological regulation	3	1064	9	14236	0.00281955	0.0248552	0.211332
GO:0032507	maintenance of protein location in cell	biological_process	biological regulation	8	1064	48	14236	0.0075188	0.0246599	0.211332
GO:0034331	cell junction maintenance	biological_process	cellular component organization or biogenesis	3	1064	9	14236	0.00281955	0.0248552	0.211332
GO:0035313	wound healing, spreading of epidermal cells	biological_process	cellular process	3	1064	9	14236	0.00281955	0.0248552	0.211332
GO:0035412	regulation of catenin import into nucleus	biological_process	biological regulation	5	1064	23	14236	0.00469925	0.0250695	0.211332
GO:0044030	regulation of DNA methylation	biological_process	biological regulation	3	1064	9	14236	0.00281955	0.0248552	0.211332
GO:0045059	positive thymic T cell selection	biological_process	cellular process	3	1064	9	14236	0.00281955	0.0248552	0.211332
GO:0046643	regulation of gamma-delta T cell activation	biological_process	biological regulation	3	1064	9	14236	0.00281955	0.0248552	0.211332
GO:0046645	positive regulation of gamma-delta T cell activation	biological_process	biological regulation	3	1064	9	14236	0.00281955	0.0248552	0.211332
GO:0046777	protein autophosphorylation	biological_process	cellular process	20	1064	167	14236	0.018797	0.0243754	0.211332
GO:0048858	cell projection morphogenesis	biological_process	cellular component organization or biogenesis	48	1064	482	14236	0.0451128	0.024997	0.211332
GO:0060147	regulation of posttranscriptional gene silencing	biological_process	biological regulation	3	1064	9	14236	0.00281955	0.0248552	0.211332
GO:0060896	neural plate pattern specification	biological_process	multicellular organismal process	3	1064	9	14236	0.00281955	0.0248552	0.211332
GO:0060964	regulation of gene silencing by miRNA	biological_process	biological regulation	3	1064	9	14236	0.00281955	0.0248552	0.211332
GO:0060966	regulation of gene silencing by RNA	biological_process	biological regulation	3	1064	9	14236	0.00281955	0.0248552	0.211332
GO:0061036	positive regulation of cartilage development	biological_process	biological regulation	5	1064	23	14236	0.00469925	0.0250695	0.211332
GO:0098773	skin epidermis development	biological_process	multicellular organismal process	11	1064	76	14236	0.0103383	0.0251219	0.211332
GO:1903727	positive regulation of phospholipid metabolic process	biological_process	biological regulation	6	1064	31	14236	0.0056391	0.0251808	0.211607
GO:0051051	negative regulation of transport	biological_process	biological regulation	32	1064	299	14236	0.0300752	0.0252627	0.212076
GO:0043086	negative regulation of catalytic activity	biological_process	biological regulation	53	1064	541	14236	0.049812	0.025391	0.212932
GO:0071241	cellular response to inorganic substance	biological_process	cellular process	12	1064	86	14236	0.0112782	0.0258018	0.216153
GO:0019787	ubiquitin-like protein transferase activity	molecular_function	catalytic activity	42	1178	423	16131	0.0356537	0.026012	0.217545
GO:0120036	plasma membrane bounded cell projection organization	biological_process	cellular component organization or biogenesis	66	1064	696	14236	0.0620301	0.0260216	0.217545
GO:0043902	positive regulation of multi-organism process	biological_process	biological regulation	14	1064	106	14236	0.0131579	0.0261042	0.218011
GO:0006952	defense response	biological_process	response to stimulus	83	1064	902	14236	0.0780075	0.0267198	0.222922
GO:0044389	ubiquitin-like protein ligase binding	molecular_function	binding	29	1178	273	16131	0.024618	0.0269058	0.224242
GO:0009214	cyclic nucleotide catabolic process	biological_process	cellular process	4	1064	16	14236	0.0037594	0.0273378	0.225065
GO:0014066	regulation of phosphatidylinositol 3-kinase signaling	biological_process	biological regulation	9	1064	58	14236	0.00845865	0.0272277	0.225065
GO:0030018	Z disc	cellular_component	organelle part	14	1230	112	17330	0.0113821	0.0271252	0.225065
GO:0030502	negative regulation of bone mineralization	biological_process	biological regulation	4	1064	16	14236	0.0037594	0.0273378	0.225065
GO:0031519	PcG protein complex	cellular_component	organelle part	7	1230	42	17330	0.00569106	0.0270371	0.225065
GO:0032461	positive regulation of protein oligomerization	biological_process	biological regulation	4	1064	16	14236	0.0037594	0.0273378	0.225065
GO:0051019	mitogen-activated protein kinase binding	molecular_function	binding	5	1178	24	16131	0.00424448	0.0272706	0.225065
GO:0051052	regulation of DNA metabolic process	biological_process	biological regulation	25	1064	223	14236	0.0234962	0.02721	0.225065
GO:0055017	cardiac muscle tissue growth	biological_process	growth	4	1064	16	14236	0.0037594	0.0273378	0.225065
GO:0060711	labyrinthine layer development	biological_process	multicellular organismal process	7	1064	40	14236	0.00657895	0.0271175	0.225065
GO:0071371	cellular response to gonadotropin stimulus	biological_process	cellular process	4	1064	16	14236	0.0037594	0.0273378	0.225065
GO:0090279	regulation of calcium ion import	biological_process	biological regulation	4	1064	16	14236	0.0037594	0.0273378	0.225065
GO:1901698	response to nitrogen compound	biological_process	response to stimulus	64	1064	674	14236	0.0601504	0.0273868	0.225239
GO:0072558	NLRP1 inflammasome complex	cellular_component	cell	2	1230	4	17330	0.00162602	0.027424	0.225316
GO:0002039	p53 binding	molecular_function	binding	10	1178	69	16131	0.00848896	0.0275301	0.225959
GO:0042578	phosphoric ester hydrolase activity	molecular_function	catalytic activity	38	1178	378	16131	0.0322581	0.0279105	0.228849
GO:0046683	response to organophosphorus	biological_process	response to stimulus	12	1064	87	14236	0.0112782	0.0279725	0.229126
GO:0008013	beta-catenin binding	molecular_function	binding	12	1178	89	16131	0.0101868	0.0280501	0.229298
GO:0035303	regulation of dephosphorylation	biological_process	biological regulation	14	1064	107	14236	0.0131579	0.0280487	0.229298
GO:0042035	regulation of cytokine biosynthetic process	biological_process	biological regulation	13	1064	97	14236	0.012218	0.0281558	0.22993
GO:0043169	cation binding	molecular_function	binding	334	1178	4186	16131	0.283531	0.0282142	0.230175
GO:0001515	opioid peptide activity	molecular_function	molecular function regulator	2	1178	4	16131	0.00169779	0.0289492	0.231358
GO:0001826	inner cell mass cell differentiation	biological_process	cellular process	2	1064	4	14236	0.0018797	0.0302491	0.231358
GO:0001891	phagocytic cup	cellular_component	cell	4	1230	17	17330	0.00325203	0.0285268	0.231358
GO:0002275	myeloid cell activation involved in immune response	biological_process	cellular process	6	1064	32	14236	0.0056391	0.0290954	0.231358
GO:0002638	negative regulation of immunoglobulin production	biological_process	biological regulation	2	1064	4	14236	0.0018797	0.0302491	0.231358
GO:0002828	regulation of type 2 immune response	biological_process	biological regulation	5	1064	24	14236	0.00469925	0.0297757	0.231358
GO:0002831	regulation of response to biotic stimulus	biological_process	biological regulation	10	1064	68	14236	0.0093985	0.0288749	0.231358
GO:0002905	regulation of mature B cell apoptotic process	biological_process	biological regulation	2	1064	4	14236	0.0018797	0.0302491	0.231358
GO:0002906	negative regulation of mature B cell apoptotic process	biological_process	biological regulation	2	1064	4	14236	0.0018797	0.0302491	0.231358
GO:0003002	regionalization	biological_process	multicellular organismal process	33	1064	314	14236	0.031015	0.0293857	0.231358
GO:0003150	muscular septum morphogenesis	biological_process	multicellular organismal process	2	1064	4	14236	0.0018797	0.0302491	0.231358
GO:0003209	cardiac atrium morphogenesis	biological_process	multicellular organismal process	5	1064	24	14236	0.00469925	0.0297757	0.231358
GO:0003289	atrial septum primum morphogenesis	biological_process	multicellular organismal process	2	1064	4	14236	0.0018797	0.0302491	0.231358
GO:0003886	DNA (cytosine-5-)-methyltransferase activity	molecular_function	catalytic activity	2	1178	4	16131	0.00169779	0.0289492	0.231358
GO:0007176	regulation of epidermal growth factor-activated receptor activity	biological_process	biological regulation	5	1064	24	14236	0.00469925	0.0297757	0.231358
GO:0008330	protein tyrosine/threonine phosphatase activity	molecular_function	catalytic activity	2	1178	4	16131	0.00169779	0.0289492	0.231358
GO:0009416	response to light stimulus	biological_process	response to stimulus	25	1064	224	14236	0.0234962	0.028541	0.231358
GO:0010543	regulation of platelet activation	biological_process	biological regulation	5	1064	24	14236	0.00469925	0.0297757	0.231358
GO:0010989	negative regulation of low-density lipoprotein particle clearance	biological_process	biological regulation	2	1064	4	14236	0.0018797	0.0302491	0.231358
GO:0015350	methotrexate transmembrane transporter activity	molecular_function	transporter activity	2	1178	4	16131	0.00169779	0.0289492	0.231358
GO:0016055	Wnt signaling pathway	biological_process	biological regulation	19	1064	160	14236	0.0178571	0.0299242	0.231358
GO:0021761	limbic system development	biological_process	multicellular organismal process	11	1064	78	14236	0.0103383	0.0298317	0.231358
GO:0030968	endoplasmic reticulum unfolded protein response	biological_process	biological regulation	12	1064	88	14236	0.0112782	0.0302727	0.231358
GO:0031016	pancreas development	biological_process	multicellular organismal process	11	1064	78	14236	0.0103383	0.0298317	0.231358
GO:0031901	early endosome membrane	cellular_component	organelle part	14	1230	113	17330	0.0113821	0.0290172	0.231358
GO:0033135	regulation of peptidyl-serine phosphorylation	biological_process	biological regulation	10	1064	68	14236	0.0093985	0.0288749	0.231358
GO:0033300	dehydroascorbic acid transmembrane transporter activity	molecular_function	transporter activity	2	1178	4	16131	0.00169779	0.0289492	0.231358
GO:0033613	activating transcription factor binding	molecular_function	binding	9	1178	60	16131	0.00764007	0.0291449	0.231358
GO:0034121	regulation of toll-like receptor signaling pathway	biological_process	biological regulation	6	1064	32	14236	0.0056391	0.0290954	0.231358
GO:0034141	positive regulation of toll-like receptor 3 signaling pathway	biological_process	biological regulation	2	1064	4	14236	0.0018797	0.0302491	0.231358
GO:0034371	chylomicron remodeling	biological_process	cellular component organization or biogenesis	2	1064	4	14236	0.0018797	0.0302491	0.231358
GO:0034698	response to gonadotropin	biological_process	response to stimulus	5	1064	24	14236	0.00469925	0.0297757	0.231358
GO:0035004	phosphatidylinositol 3-kinase activity	molecular_function	catalytic activity	10	1178	70	16131	0.00848896	0.030096	0.231358
GO:0035335	peptidyl-tyrosine dephosphorylation	biological_process	cellular process	9	1064	59	14236	0.00845865	0.0300777	0.231358
GO:0035791	platelet-derived growth factor receptor-beta signaling pathway	biological_process	biological regulation	2	1064	4	14236	0.0018797	0.0302491	0.231358
GO:0042493	response to drug	biological_process	response to stimulus	36	1064	348	14236	0.0338346	0.0292462	0.231358
GO:0042594	response to starvation	biological_process	response to stimulus	10	1064	68	14236	0.0093985	0.0288749	0.231358
GO:0043313	regulation of neutrophil degranulation	biological_process	biological regulation	2	1064	4	14236	0.0018797	0.0302491	0.231358
GO:0043552	positive regulation of phosphatidylinositol 3-kinase activity	biological_process	biological regulation	5	1064	24	14236	0.00469925	0.0297757	0.231358
GO:0044351	macropinocytosis	biological_process	localization	2	1064	4	14236	0.0018797	0.0302491	0.231358
GO:0045321	leukocyte activation	biological_process	cellular process	35	1064	337	14236	0.0328947	0.0297006	0.231358
GO:0045345	positive regulation of MHC class I biosynthetic process	biological_process	biological regulation	2	1064	4	14236	0.0018797	0.0302491	0.231358
GO:0050693	LBD domain binding	molecular_function	binding	2	1178	4	16131	0.00169779	0.0289492	0.231358
GO:0051125	regulation of actin nucleation	biological_process	cellular component organization or biogenesis	2	1064	4	14236	0.0018797	0.0302491	0.231358
GO:0051409	response to nitrosative stress	biological_process	response to stimulus	2	1064	4	14236	0.0018797	0.0302491	0.231358
GO:0060213	positive regulation of nuclear-transcribed mRNA poly(A) tail shortening	biological_process	biological regulation	2	1064	4	14236	0.0018797	0.0302491	0.231358
GO:0060214	endocardium formation	biological_process	multicellular organismal process	2	1064	4	14236	0.0018797	0.0302491	0.231358
GO:0060278	regulation of ovulation	biological_process	biological regulation	2	1064	4	14236	0.0018797	0.0302491	0.231358
GO:0060332	positive regulation of response to interferon-gamma	biological_process	biological regulation	2	1064	4	14236	0.0018797	0.0302491	0.231358
GO:0060335	positive regulation of interferon-gamma-mediated signaling pathway	biological_process	biological regulation	2	1064	4	14236	0.0018797	0.0302491	0.231358
GO:0060541	respiratory system development	biological_process	multicellular organismal process	21	1064	181	14236	0.0197368	0.0292736	0.231358
GO:0060708	spongiotrophoblast differentiation	biological_process	cellular process	2	1064	4	14236	0.0018797	0.0302491	0.231358
GO:0071072	negative regulation of phospholipid biosynthetic process	biological_process	biological regulation	2	1064	4	14236	0.0018797	0.0302491	0.231358
GO:0071478	cellular response to radiation	biological_process	cellular process	11	1064	78	14236	0.0103383	0.0298317	0.231358
GO:0071877	regulation of adrenergic receptor signaling pathway	biological_process	biological regulation	2	1064	4	14236	0.0018797	0.0302491	0.231358
GO:0072341	modified amino acid binding	molecular_function	binding	10	1178	70	16131	0.00848896	0.030096	0.231358
GO:0072584	caveolin-mediated endocytosis	biological_process	localization	2	1064	4	14236	0.0018797	0.0302491	0.231358
GO:0090308	regulation of methylation-dependent chromatin silencing	biological_process	biological regulation	2	1064	4	14236	0.0018797	0.0302491	0.231358
GO:0097029	mature conventional dendritic cell differentiation	biological_process	cellular process	2	1064	4	14236	0.0018797	0.0302491	0.231358
GO:0198738	cell-cell signaling by wnt	biological_process	cellular process	19	1064	160	14236	0.0178571	0.0299242	0.231358
GO:1900153	positive regulation of nuclear-transcribed mRNA catabolic process, deadenylation-dependent decay	biological_process	biological regulation	2	1064	4	14236	0.0018797	0.0302491	0.231358
GO:1902563	regulation of neutrophil activation	biological_process	biological regulation	2	1064	4	14236	0.0018797	0.0302491	0.231358
GO:1905207	regulation of cardiocyte differentiation	biological_process	biological regulation	5	1064	24	14236	0.00469925	0.0297757	0.231358
GO:1990254	keratin filament binding	molecular_function	binding	2	1178	4	16131	0.00169779	0.0289492	0.231358
GO:2000589	regulation of metanephric mesenchymal cell migration	biological_process	biological regulation	2	1064	4	14236	0.0018797	0.0302491	0.231358
GO:2000726	negative regulation of cardiac muscle cell differentiation	biological_process	biological regulation	2	1064	4	14236	0.0018797	0.0302491	0.231358
GO:2001020	regulation of response to DNA damage stimulus	biological_process	biological regulation	12	1064	88	14236	0.0112782	0.0302727	0.231358
GO:0002718	regulation of cytokine production involved in immune response	biological_process	biological regulation	7	1064	41	14236	0.00657895	0.030665	0.234135
GO:0045930	negative regulation of mitotic cell cycle	biological_process	biological regulation	21	1064	182	14236	0.0197368	0.0308559	0.23537
GO:0031674	I band	cellular_component	organelle part	15	1230	125	17330	0.0121951	0.0314391	0.239594
GO:0002687	positive regulation of leukocyte migration	biological_process	biological regulation	10	1064	69	14236	0.0093985	0.0315947	0.240222
GO:0005072	transforming growth factor beta receptor, cytoplasmic mediator activity	molecular_function	signal transducer activity	3	1178	10	16131	0.00254669	0.0316105	0.240222
GO:0036122	BMP binding	molecular_function	binding	3	1178	10	16131	0.00254669	0.0316105	0.240222
GO:0031175	neuron projection development	biological_process	cellular component organization or biogenesis	56	1064	584	14236	0.0526316	0.0317123	0.240769
GO:0016922	ligand-dependent nuclear receptor binding	molecular_function	binding	5	1178	25	16131	0.00424448	0.0321012	0.243494
GO:0005901	caveola	cellular_component	cell	11	1230	83	17330	0.00894309	0.0322856	0.244664
GO:1903530	regulation of secretion by cell	biological_process	biological regulation	42	1064	420	14236	0.0394737	0.032342	0.244862
GO:0001562	response to protozoan	biological_process	multi-organism process	4	1064	17	14236	0.0037594	0.0336905	0.247216
GO:0001836	release of cytochrome c from mitochondria	biological_process	cellular component organization or biogenesis	4	1064	17	14236	0.0037594	0.0336905	0.247216
GO:0002829	negative regulation of type 2 immune response	biological_process	biological regulation	3	1064	10	14236	0.00281955	0.0335702	0.247216
GO:0003283	atrial septum development	biological_process	multicellular organismal process	4	1064	17	14236	0.0037594	0.0336905	0.247216
GO:0006534	cysteine metabolic process	biological_process	cellular process	3	1064	10	14236	0.00281955	0.0335702	0.247216
GO:0007050	cell cycle arrest	biological_process	biological regulation	16	1064	130	14236	0.0150376	0.0329533	0.247216
GO:0016114	terpenoid biosynthetic process	biological_process	cellular process	3	1064	10	14236	0.00281955	0.0335702	0.247216
GO:0022008	neurogenesis	biological_process	cellular process	105	1064	1182	14236	0.0986842	0.0332305	0.247216
GO:0022617	extracellular matrix disassembly	biological_process	cellular component organization or biogenesis	6	1064	33	14236	0.0056391	0.0333893	0.247216
GO:0031272	regulation of pseudopodium assembly	biological_process	biological regulation	3	1064	10	14236	0.00281955	0.0335702	0.247216
GO:0032495	response to muramyl dipeptide	biological_process	response to stimulus	3	1064	10	14236	0.00281955	0.0335702	0.247216
GO:0032648	regulation of interferon-beta production	biological_process	biological regulation	6	1064	33	14236	0.0056391	0.0333893	0.247216
GO:0032682	negative regulation of chemokine production	biological_process	biological regulation	3	1064	10	14236	0.00281955	0.0335702	0.247216
GO:0034620	cellular response to unfolded protein	biological_process	cellular process	12	1064	89	14236	0.0112782	0.0327061	0.247216
GO:0035414	negative regulation of catenin import into nucleus	biological_process	biological regulation	3	1064	10	14236	0.00281955	0.0335702	0.247216
GO:0035567	non-canonical Wnt signaling pathway	biological_process	biological regulation	6	1064	33	14236	0.0056391	0.0333893	0.247216
GO:0045176	apical protein localization	biological_process	localization	3	1064	10	14236	0.00281955	0.0335702	0.247216
GO:0045191	regulation of isotype switching	biological_process	biological regulation	4	1064	17	14236	0.0037594	0.0336905	0.247216
GO:0045579	positive regulation of B cell differentiation	biological_process	biological regulation	3	1064	10	14236	0.00281955	0.0335702	0.247216
GO:0045599	negative regulation of fat cell differentiation	biological_process	biological regulation	6	1064	33	14236	0.0056391	0.0333893	0.247216
GO:0045824	negative regulation of innate immune response	biological_process	biological regulation	4	1064	17	14236	0.0037594	0.0336905	0.247216
GO:0045833	negative regulation of lipid metabolic process	biological_process	biological regulation	9	1064	60	14236	0.00845865	0.0331294	0.247216
GO:0045921	positive regulation of exocytosis	biological_process	biological regulation	6	1064	33	14236	0.0056391	0.0333893	0.247216
GO:0048711	positive regulation of astrocyte differentiation	biological_process	biological regulation	3	1064	10	14236	0.00281955	0.0335702	0.247216
GO:0051651	maintenance of location in cell	biological_process	biological regulation	9	1064	60	14236	0.00845865	0.0331294	0.247216
GO:0060261	positive regulation of transcription initiation from RNA polymerase II promoter	biological_process	biological regulation	3	1064	10	14236	0.00281955	0.0335702	0.247216
GO:0060395	SMAD protein signal transduction	biological_process	biological regulation	4	1064	17	14236	0.0037594	0.0336905	0.247216
GO:0060969	negative regulation of gene silencing	biological_process	biological regulation	3	1064	10	14236	0.00281955	0.0335702	0.247216
GO:0072111	cell proliferation involved in kidney development	biological_process	multicellular organismal process	3	1064	10	14236	0.00281955	0.0335702	0.247216
GO:0097067	cellular response to thyroid hormone stimulus	biological_process	cellular process	3	1064	10	14236	0.00281955	0.0335702	0.247216
GO:0098984	neuron to neuron synapse	cellular_component	synapse	19	1230	170	17330	0.0154472	0.0328268	0.247216
GO:1900027	regulation of ruffle assembly	biological_process	biological regulation	3	1064	10	14236	0.00281955	0.0335702	0.247216
GO:1903306	negative regulation of regulated secretory pathway	biological_process	biological regulation	3	1064	10	14236	0.00281955	0.0335702	0.247216
GO:2000278	regulation of DNA biosynthetic process	biological_process	biological regulation	6	1064	33	14236	0.0056391	0.0333893	0.247216
GO:0033044	regulation of chromosome organization	biological_process	biological regulation	20	1064	173	14236	0.018797	0.0339005	0.248532
GO:0002260	lymphocyte homeostasis	biological_process	biological regulation	7	1064	42	14236	0.00657895	0.0345113	0.250354
GO:0021885	forebrain cell migration	biological_process	cellular process	7	1064	42	14236	0.00657895	0.0345113	0.250354
GO:0030512	negative regulation of transforming growth factor beta receptor signaling pathway	biological_process	biological regulation	10	1064	70	14236	0.0093985	0.0344897	0.250354
GO:0031647	regulation of protein stability	biological_process	biological regulation	14	1064	110	14236	0.0131579	0.0345198	0.250354
GO:0032479	regulation of type I interferon production	biological_process	biological regulation	10	1064	70	14236	0.0093985	0.0344897	0.250354
GO:0043620	regulation of DNA-templated transcription in response to stress	biological_process	biological regulation	7	1064	42	14236	0.00657895	0.0345113	0.250354
GO:0050772	positive regulation of axonogenesis	biological_process	biological regulation	7	1064	42	14236	0.00657895	0.0345113	0.250354
GO:0050818	regulation of coagulation	biological_process	biological regulation	10	1064	70	14236	0.0093985	0.0344897	0.250354
GO:0050868	negative regulation of T cell activation	biological_process	biological regulation	10	1064	70	14236	0.0093985	0.0344897	0.250354
GO:0098772	molecular function regulator	molecular_function	molecular function regulator	116	1178	1350	16131	0.098472	0.0344122	0.250354
GO:1903038	negative regulation of leukocyte cell-cell adhesion	biological_process	biological regulation	10	1064	70	14236	0.0093985	0.0344897	0.250354
GO:1903845	negative regulation of cellular response to transforming growth factor beta stimulus	biological_process	biological regulation	10	1064	70	14236	0.0093985	0.0344897	0.250354
GO:0015662	ATPase activity, coupled to transmembrane movement of ions, phosphorylative mechanism	molecular_function	transporter activity	6	1178	34	16131	0.00509338	0.0345543	0.250379
GO:0003179	heart valve morphogenesis	biological_process	multicellular organismal process	5	1064	25	14236	0.00469925	0.0350022	0.251814
GO:0006692	prostanoid metabolic process	biological_process	cellular process	5	1064	25	14236	0.00469925	0.0350022	0.251814
GO:0006693	prostaglandin metabolic process	biological_process	cellular process	5	1064	25	14236	0.00469925	0.0350022	0.251814
GO:0032570	response to progesterone	biological_process	response to stimulus	5	1064	25	14236	0.00469925	0.0350022	0.251814
GO:0043029	T cell homeostasis	biological_process	biological regulation	5	1064	25	14236	0.00469925	0.0350022	0.251814
GO:0043168	anion binding	molecular_function	binding	220	1178	2697	16131	0.186757	0.035032	0.251814
GO:0045581	negative regulation of T cell differentiation	biological_process	biological regulation	5	1064	25	14236	0.00469925	0.0350022	0.251814
GO:0090218	positive regulation of lipid kinase activity	biological_process	biological regulation	5	1064	25	14236	0.00469925	0.0350022	0.251814
GO:0097028	dendritic cell differentiation	biological_process	cellular process	5	1064	25	14236	0.00469925	0.0350022	0.251814
GO:0002761	regulation of myeloid leukocyte differentiation	biological_process	biological regulation	11	1064	80	14236	0.0103383	0.035141	0.252332
GO:0046934	phosphatidylinositol-4,5-bisphosphate 3-kinase activity	molecular_function	catalytic activity	9	1178	62	16131	0.00764007	0.0351664	0.252332
GO:0072163	mesonephric epithelium development	biological_process	multicellular organismal process	12	1064	90	14236	0.0112782	0.0352761	0.252671
GO:0072164	mesonephric tubule development	biological_process	multicellular organismal process	12	1064	90	14236	0.0112782	0.0352761	0.252671
GO:0030017	sarcomere	cellular_component	organelle part	20	1230	183	17330	0.0162602	0.0357505	0.255843
GO:0016604	nuclear body	cellular_component	organelle part	35	1230	360	17330	0.0284553	0.0361438	0.258429
GO:0032990	cell part morphogenesis	biological_process	cellular component organization or biogenesis	48	1064	494	14236	0.0451128	0.0363844	0.259264
GO:0042632	cholesterol homeostasis	biological_process	biological regulation	9	1064	61	14236	0.00845865	0.0363885	0.259264
GO:0071772	response to BMP	biological_process	response to stimulus	9	1064	61	14236	0.00845865	0.0363885	0.259264
GO:0071773	cellular response to BMP stimulus	biological_process	cellular process	9	1064	61	14236	0.00845865	0.0363885	0.259264
GO:0019903	protein phosphatase binding	molecular_function	binding	15	1178	124	16131	0.0127334	0.0366033	0.260565
GO:0051962	positive regulation of nervous system development	biological_process	biological regulation	28	1064	263	14236	0.0263158	0.0366562	0.260713
GO:0007169	transmembrane receptor protein tyrosine kinase signaling pathway	biological_process	biological regulation	50	1064	518	14236	0.0469925	0.0367805	0.261367
GO:0003006	developmental process involved in reproduction	biological_process	reproductive process	53	1064	554	14236	0.049812	0.0372097	0.264064
GO:0051048	negative regulation of secretion	biological_process	biological regulation	16	1064	132	14236	0.0150376	0.0372251	0.264064
GO:0071824	protein-DNA complex subunit organization	biological_process	cellular component organization or biogenesis	19	1064	164	14236	0.0178571	0.0372619	0.264093
GO:0006325	chromatin organization	biological_process	cellular component organization or biogenesis	44	1064	448	14236	0.0413534	0.0375853	0.265456
GO:0019218	regulation of steroid metabolic process	biological_process	biological regulation	10	1064	71	14236	0.0093985	0.0375647	0.265456
GO:0048644	muscle organ morphogenesis	biological_process	multicellular organismal process	10	1064	71	14236	0.0093985	0.0375647	0.265456
GO:0099513	polymeric cytoskeletal fiber	cellular_component	organelle part	60	1230	671	17330	0.0487805	0.0375754	0.265456
GO:0004745	retinol dehydrogenase activity	molecular_function	catalytic activity	4	1178	18	16131	0.00339559	0.0379568	0.267821
GO:0019827	stem cell population maintenance	biological_process	multicellular organismal process	12	1064	91	14236	0.0112782	0.0379862	0.267821
GO:0055002	striated muscle cell development	biological_process	cellular process	11	1064	81	14236	0.0103383	0.0380307	0.267902
GO:0045620	negative regulation of lymphocyte differentiation	biological_process	biological regulation	6	1064	34	14236	0.0056391	0.0380731	0.267967
GO:0071902	positive regulation of protein serine/threonine kinase activity	biological_process	biological regulation	28	1064	264	14236	0.0263158	0.038204	0.268655
GO:0023021	termination of signal transduction	biological_process	biological regulation	7	1064	43	14236	0.00657895	0.0386644	0.271657
GO:0007409	axonogenesis	biological_process	cellular component organization or biogenesis	44	1064	449	14236	0.0413534	0.0387782	0.27222
GO:0051046	regulation of secretion	biological_process	biological regulation	45	1064	461	14236	0.0422932	0.0390711	0.274039
GO:0001725	stress fiber	cellular_component	organelle part	8	1230	55	17330	0.00650407	0.0391508	0.274123
GO:0097517	contractile actin filament bundle	cellular_component	organelle part	8	1230	55	17330	0.00650407	0.0391508	0.274123
GO:0031463	Cul3-RING ubiquitin ligase complex	cellular_component	cell	9	1230	65	17330	0.00731707	0.0392657	0.274453
GO:0042641	actomyosin	cellular_component	organelle part	9	1230	65	17330	0.00731707	0.0392657	0.274453
GO:0030016	myofibril	cellular_component	cell	22	1230	208	17330	0.0178862	0.0393496	0.274803
GO:0032103	positive regulation of response to external stimulus	biological_process	biological regulation	21	1064	187	14236	0.0197368	0.0397458	0.27733
GO:0055092	sterol homeostasis	biological_process	biological regulation	9	1064	62	14236	0.00845865	0.0398604	0.277891
GO:0001706	endoderm formation	biological_process	multicellular organismal process	5	1064	26	14236	0.00469925	0.0407606	0.279122
GO:0001773	myeloid dendritic cell activation	biological_process	cellular process	4	1064	18	14236	0.0037594	0.0408294	0.279122
GO:0002833	positive regulation of response to biotic stimulus	biological_process	biological regulation	5	1064	26	14236	0.00469925	0.0407606	0.279122
GO:0004620	phospholipase activity	molecular_function	catalytic activity	12	1178	94	16131	0.0101868	0.0405915	0.279122
GO:0009154	purine ribonucleotide catabolic process	biological_process	cellular process	5	1064	26	14236	0.00469925	0.0407606	0.279122
GO:0009986	cell surface	cellular_component	cell	66	1230	750	17330	0.0536585	0.0403424	0.279122
GO:0010453	regulation of cell fate commitment	biological_process	biological regulation	5	1064	26	14236	0.00469925	0.0407606	0.279122
GO:0010611	regulation of cardiac muscle hypertrophy	biological_process	biological regulation	4	1064	18	14236	0.0037594	0.0408294	0.279122
GO:0010677	negative regulation of cellular carbohydrate metabolic process	biological_process	biological regulation	5	1064	26	14236	0.00469925	0.0407606	0.279122
GO:0010894	negative regulation of steroid biosynthetic process	biological_process	biological regulation	4	1064	18	14236	0.0037594	0.0408294	0.279122
GO:0030510	regulation of BMP signaling pathway	biological_process	biological regulation	10	1064	72	14236	0.0093985	0.0408241	0.279122
GO:0032355	response to estradiol	biological_process	response to stimulus	10	1064	72	14236	0.0093985	0.0408241	0.279122
GO:0042572	retinol metabolic process	biological_process	biological regulation	4	1064	18	14236	0.0037594	0.0408294	0.279122
GO:0045814	negative regulation of gene expression, epigenetic	biological_process	biological regulation	5	1064	26	14236	0.00469925	0.0407606	0.279122
GO:0045912	negative regulation of carbohydrate metabolic process	biological_process	biological regulation	5	1064	26	14236	0.00469925	0.0407606	0.279122
GO:0048013	ephrin receptor signaling pathway	biological_process	biological regulation	5	1064	26	14236	0.00469925	0.0407606	0.279122
GO:0060419	heart growth	biological_process	multicellular organismal process	4	1064	18	14236	0.0037594	0.0408294	0.279122
GO:0060600	dichotomous subdivision of an epithelial terminal unit	biological_process	multicellular organismal process	4	1064	18	14236	0.0037594	0.0408294	0.279122
GO:0060716	labyrinthine layer blood vessel development	biological_process	multicellular organismal process	4	1064	18	14236	0.0037594	0.0408294	0.279122
GO:0070168	negative regulation of biomineral tissue development	biological_process	biological regulation	4	1064	18	14236	0.0037594	0.0408294	0.279122
GO:0070723	response to cholesterol	biological_process	response to stimulus	4	1064	18	14236	0.0037594	0.0408294	0.279122
GO:0090023	positive regulation of neutrophil chemotaxis	biological_process	biological regulation	4	1064	18	14236	0.0037594	0.0408294	0.279122
GO:1903578	regulation of ATP metabolic process	biological_process	biological regulation	5	1064	26	14236	0.00469925	0.0407606	0.279122
GO:0014069	postsynaptic density	cellular_component	synapse part	18	1230	163	17330	0.0146341	0.0409595	0.279539
GO:0099572	postsynaptic specialization	cellular_component	synapse part	18	1230	163	17330	0.0146341	0.0409595	0.279539
GO:0004143	diacylglycerol kinase activity	molecular_function	catalytic activity	3	1178	11	16131	0.00254669	0.0411552	0.279932
GO:0005160	transforming growth factor beta receptor binding	molecular_function	binding	8	1178	54	16131	0.00679117	0.0410567	0.279932
GO:0042834	peptidoglycan binding	molecular_function	binding	3	1178	11	16131	0.00254669	0.0411552	0.279932
GO:0070411	I-SMAD binding	molecular_function	binding	3	1178	11	16131	0.00254669	0.0411552	0.279932
GO:0021537	telencephalon development	biological_process	multicellular organismal process	19	1064	166	14236	0.0178571	0.0413902	0.281294
GO:0001158	enhancer sequence-specific DNA binding	molecular_function	binding	11	1178	84	16131	0.00933786	0.0415162	0.281913
GO:0072171	mesonephric tubule morphogenesis	biological_process	multicellular organismal process	8	1064	53	14236	0.0075188	0.04183	0.283806
GO:1900180	regulation of protein localization to nucleus	biological_process	biological regulation	16	1064	134	14236	0.0150376	0.0418844	0.283937
GO:0010212	response to ionizing radiation	biological_process	response to stimulus	14	1064	113	14236	0.0131579	0.0420046	0.284515
GO:0072562	blood microparticle	cellular_component	extracellular region	14	1230	119	17330	0.0113821	0.0424444	0.287253
GO:0001542	ovulation from ovarian follicle	biological_process	multi-organism process	3	1064	11	14236	0.00281955	0.0436514	0.290328
GO:0002637	regulation of immunoglobulin production	biological_process	biological regulation	6	1064	35	14236	0.0056391	0.0431553	0.290328
GO:0002889	regulation of immunoglobulin mediated immune response	biological_process	biological regulation	6	1064	35	14236	0.0056391	0.0431553	0.290328
GO:0008064	regulation of actin polymerization or depolymerization	biological_process	cellular component organization or biogenesis	13	1064	103	14236	0.012218	0.0430402	0.290328
GO:0030225	macrophage differentiation	biological_process	cellular process	3	1064	11	14236	0.00281955	0.0436514	0.290328
GO:0030500	regulation of bone mineralization	biological_process	biological regulation	9	1064	63	14236	0.00845865	0.0435499	0.290328
GO:0030832	regulation of actin filament length	biological_process	cellular component organization or biogenesis	13	1064	103	14236	0.012218	0.0430402	0.290328
GO:0030834	regulation of actin filament depolymerization	biological_process	cellular component organization or biogenesis	6	1064	35	14236	0.0056391	0.0431553	0.290328
GO:0031313	extrinsic component of endosome membrane	cellular_component	organelle part	2	1230	5	17330	0.00162602	0.043574	0.290328
GO:0034308	primary alcohol metabolic process	biological_process	metabolic process	6	1064	35	14236	0.0056391	0.0431553	0.290328
GO:0036157	outer dynein arm	cellular_component	organelle part	2	1230	5	17330	0.00162602	0.043574	0.290328
GO:0039531	regulation of viral-induced cytoplasmic pattern recognition receptor signaling pathway	biological_process	biological regulation	3	1064	11	14236	0.00281955	0.0436514	0.290328
GO:0039535	regulation of RIG-I signaling pathway	biological_process	biological regulation	3	1064	11	14236	0.00281955	0.0436514	0.290328
GO:0043518	negative regulation of DNA damage response, signal transduction by p53 class mediator	biological_process	biological regulation	3	1064	11	14236	0.00281955	0.0436514	0.290328
GO:0044300	cerebellar mossy fiber	cellular_component	cell	2	1230	5	17330	0.00162602	0.043574	0.290328
GO:0045499	chemorepellent activity	molecular_function	molecular function regulator	5	1178	27	16131	0.00424448	0.0432754	0.290328
GO:0046655	folic acid metabolic process	biological_process	cellular process	3	1064	11	14236	0.00281955	0.0436514	0.290328
GO:0060707	trophoblast giant cell differentiation	biological_process	cellular process	3	1064	11	14236	0.00281955	0.0436514	0.290328
GO:0090066	regulation of anatomical structure size	biological_process	biological regulation	30	1064	290	14236	0.0281955	0.0435327	0.290328
GO:1901797	negative regulation of signal transduction by p53 class mediator	biological_process	biological regulation	3	1064	11	14236	0.00281955	0.0436514	0.290328
GO:2000144	positive regulation of DNA-templated transcription, initiation	biological_process	biological regulation	3	1064	11	14236	0.00281955	0.0436514	0.290328
GO:0035967	cellular response to topologically incorrect protein	biological_process	cellular process	12	1064	93	14236	0.0112782	0.0438396	0.291102
GO:0055001	muscle cell development	biological_process	cellular process	12	1064	93	14236	0.0112782	0.0438396	0.291102
GO:0050728	negative regulation of inflammatory response	biological_process	biological regulation	10	1064	73	14236	0.0093985	0.0442719	0.293732
GO:0016331	morphogenesis of embryonic epithelium	biological_process	multicellular organismal process	16	1064	135	14236	0.0150376	0.0443642	0.293863
GO:0031497	chromatin assembly	biological_process	cellular component organization or biogenesis	16	1064	135	14236	0.0150376	0.0443642	0.293863
GO:0071407	cellular response to organic cyclic compound	biological_process	cellular process	25	1064	234	14236	0.0234962	0.0447251	0.296011
GO:0007093	mitotic cell cycle checkpoint	biological_process	biological regulation	17	1064	146	14236	0.0159774	0.0450847	0.298148
GO:0019207	kinase regulator activity	molecular_function	molecular function regulator	21	1178	194	16131	0.0178268	0.0452163	0.298774
GO:0001134	transcription factor activity, transcription factor recruiting	molecular_function	transcription regulator activity	2	1178	5	16131	0.00169779	0.0459333	0.29893
GO:0001767	establishment of lymphocyte polarity	biological_process	cellular process	2	1064	5	14236	0.0018797	0.0479403	0.29893
GO:0001768	establishment of T cell polarity	biological_process	cellular process	2	1064	5	14236	0.0018797	0.0479403	0.29893
GO:0001771	immunological synapse formation	biological_process	cellular process	2	1064	5	14236	0.0018797	0.0479403	0.29893
GO:0001823	mesonephros development	biological_process	multicellular organismal process	12	1064	94	14236	0.0112782	0.0469889	0.29893
GO:0001824	blastocyst development	biological_process	multicellular organismal process	9	1064	64	14236	0.00845865	0.0474615	0.29893
GO:0001961	positive regulation of cytokine-mediated signaling pathway	biological_process	biological regulation	4	1064	19	14236	0.0037594	0.0487574	0.29893
GO:0002244	hematopoietic progenitor cell differentiation	biological_process	cellular process	6	1064	36	14236	0.0056391	0.0486428	0.29893
GO:0002712	regulation of B cell mediated immunity	biological_process	biological regulation	6	1064	36	14236	0.0056391	0.0486428	0.29893
GO:0002819	regulation of adaptive immune response	biological_process	biological regulation	12	1064	94	14236	0.0112782	0.0469889	0.29893
GO:0003149	membranous septum morphogenesis	biological_process	multicellular organismal process	2	1064	5	14236	0.0018797	0.0479403	0.29893
GO:0003170	heart valve development	biological_process	multicellular organismal process	5	1064	27	14236	0.00469925	0.0470589	0.29893
GO:0003284	septum primum development	biological_process	multicellular organismal process	2	1064	5	14236	0.0018797	0.0479403	0.29893
GO:0003298	physiological muscle hypertrophy	biological_process	multicellular organismal process	2	1064	5	14236	0.0018797	0.0479403	0.29893
GO:0003301	physiological cardiac muscle hypertrophy	biological_process	multicellular organismal process	2	1064	5	14236	0.0018797	0.0479403	0.29893
GO:0003841	1-acylglycerol-3-phosphate O-acyltransferase activity	molecular_function	catalytic activity	4	1178	19	16131	0.00339559	0.0453865	0.29893
GO:0004698	calcium-dependent protein kinase C activity	molecular_function	catalytic activity	2	1178	5	16131	0.00169779	0.0459333	0.29893
GO:0004842	ubiquitin-protein transferase activity	molecular_function	catalytic activity	39	1178	406	16131	0.033107	0.0477768	0.29893
GO:0005545	1-phosphatidylinositol binding	molecular_function	binding	4	1178	19	16131	0.00339559	0.0453865	0.29893
GO:0005858	axonemal dynein complex	cellular_component	organelle part	3	1230	12	17330	0.00243902	0.0483929	0.29893
GO:0006598	polyamine catabolic process	biological_process	cellular process	2	1064	5	14236	0.0018797	0.0479403	0.29893
GO:0006642	triglyceride mobilization	biological_process	cellular process	2	1064	5	14236	0.0018797	0.0479403	0.29893
GO:0006650	glycerophospholipid metabolic process	biological_process	cellular process	24	1064	224	14236	0.0225564	0.0471366	0.29893
GO:0006883	cellular sodium ion homeostasis	biological_process	biological regulation	2	1064	5	14236	0.0018797	0.0479403	0.29893
GO:0009008	DNA-methyltransferase activity	molecular_function	catalytic activity	2	1178	5	16131	0.00169779	0.0459333	0.29893
GO:0009261	ribonucleotide catabolic process	biological_process	cellular process	5	1064	27	14236	0.00469925	0.0470589	0.29893
GO:0010508	positive regulation of autophagy	biological_process	biological regulation	5	1064	27	14236	0.00469925	0.0470589	0.29893
GO:0010955	negative regulation of protein processing	biological_process	biological regulation	4	1064	19	14236	0.0037594	0.0487574	0.29893
GO:0014743	regulation of muscle hypertrophy	biological_process	biological regulation	4	1064	19	14236	0.0037594	0.0487574	0.29893
GO:0016176	superoxide-generating NADPH oxidase activator activity	molecular_function	molecular function regulator	2	1178	5	16131	0.00169779	0.0459333	0.29893
GO:0019031	viral envelope	cellular_component	virion part	3	1230	12	17330	0.00243902	0.0483929	0.29893
GO:0021904	dorsal/ventral neural tube patterning	biological_process	multicellular organismal process	4	1064	19	14236	0.0037594	0.0487574	0.29893
GO:0021954	central nervous system neuron development	biological_process	cellular process	9	1064	64	14236	0.00845865	0.0474615	0.29893
GO:0021960	anterior commissure morphogenesis	biological_process	cellular component organization or biogenesis	2	1064	5	14236	0.0018797	0.0479403	0.29893
GO:0030182	neuron differentiation	biological_process	cellular process	75	1064	829	14236	0.0704887	0.0467373	0.29893
GO:0030183	B cell differentiation	biological_process	cellular process	9	1064	64	14236	0.00845865	0.0474615	0.29893
GO:0030193	regulation of blood coagulation	biological_process	biological regulation	9	1064	64	14236	0.00845865	0.0474615	0.29893
GO:0030324	lung development	biological_process	multicellular organismal process	18	1064	158	14236	0.0169173	0.0479909	0.29893
GO:0030669	clathrin-coated endocytic vesicle membrane	cellular_component	organelle part	7	1230	47	17330	0.00569106	0.0465184	0.29893
GO:0030836	positive regulation of actin filament depolymerization	biological_process	cellular component organization or biogenesis	2	1064	5	14236	0.0018797	0.0479403	0.29893
GO:0031698	beta-2 adrenergic receptor binding	molecular_function	binding	2	1178	5	16131	0.00169779	0.0459333	0.29893
GO:0032007	negative regulation of TOR signaling	biological_process	biological regulation	4	1064	19	14236	0.0037594	0.0487574	0.29893
GO:0032387	negative regulation of intracellular transport	biological_process	biological regulation	10	1064	74	14236	0.0093985	0.0479118	0.29893
GO:0032689	negative regulation of interferon-gamma production	biological_process	biological regulation	5	1064	27	14236	0.00469925	0.0470589	0.29893
GO:0032880	regulation of protein localization	biological_process	biological regulation	47	1064	491	14236	0.0441729	0.0471429	0.29893
GO:0032930	positive regulation of superoxide anion generation	biological_process	biological regulation	2	1064	5	14236	0.0018797	0.0479403	0.29893
GO:0033003	regulation of mast cell activation	biological_process	biological regulation	5	1064	27	14236	0.00469925	0.0470589	0.29893
GO:0035358	regulation of peroxisome proliferator activated receptor signaling pathway	biological_process	biological regulation	2	1064	5	14236	0.0018797	0.0479403	0.29893
GO:0036296	response to increased oxygen levels	biological_process	response to stimulus	4	1064	19	14236	0.0037594	0.0487574	0.29893
GO:0036338	viral membrane	cellular_component	virion part	3	1230	12	17330	0.00243902	0.0483929	0.29893
GO:0040036	regulation of fibroblast growth factor receptor signaling pathway	biological_process	biological regulation	5	1064	27	14236	0.00469925	0.0470589	0.29893
GO:0042119	neutrophil activation	biological_process	cellular process	4	1064	19	14236	0.0037594	0.0487574	0.29893
GO:0042509	regulation of tyrosine phosphorylation of STAT protein	biological_process	biological regulation	2	1064	5	14236	0.0018797	0.0479403	0.29893
GO:0042531	positive regulation of tyrosine phosphorylation of STAT protein	biological_process	biological regulation	2	1064	5	14236	0.0018797	0.0479403	0.29893
GO:0043304	regulation of mast cell degranulation	biological_process	biological regulation	4	1064	19	14236	0.0037594	0.0487574	0.29893
GO:0043551	regulation of phosphatidylinositol 3-kinase activity	biological_process	biological regulation	5	1064	27	14236	0.00469925	0.0470589	0.29893
GO:0044252	negative regulation of multicellular organismal metabolic process	biological_process	biological regulation	2	1064	5	14236	0.0018797	0.0479403	0.29893
GO:0044430	cytoskeletal part	cellular_component	organelle part	122	1230	1488	17330	0.099187	0.0487823	0.29893
GO:0045061	thymic T cell selection	biological_process	cellular process	4	1064	19	14236	0.0037594	0.0487574	0.29893
GO:0045123	cellular extravasation	biological_process	cellular process	4	1064	19	14236	0.0037594	0.0487574	0.29893
GO:0045582	positive regulation of T cell differentiation	biological_process	biological regulation	8	1064	54	14236	0.0075188	0.0460235	0.29893
GO:0045667	regulation of osteoblast differentiation	biological_process	biological regulation	13	1064	104	14236	0.012218	0.0459721	0.29893
GO:0045843	negative regulation of striated muscle tissue development	biological_process	biological regulation	5	1064	27	14236	0.00469925	0.0470589	0.29893
GO:0045932	negative regulation of muscle contraction	biological_process	biological regulation	4	1064	19	14236	0.0037594	0.0487574	0.29893
GO:0046474	glycerophospholipid biosynthetic process	biological_process	cellular process	21	1064	190	14236	0.0197368	0.04591	0.29893
GO:0046882	negative regulation of follicle-stimulating hormone secretion	biological_process	biological regulation	2	1064	5	14236	0.0018797	0.0479403	0.29893
GO:0046923	ER retention sequence binding	molecular_function	binding	2	1178	5	16131	0.00169779	0.0459333	0.29893
GO:0046983	protein dimerization activity	molecular_function	binding	102	1178	1189	16131	0.0865874	0.046985	0.29893
GO:0050829	defense response to Gram-negative bacterium	biological_process	multi-organism process	4	1064	19	14236	0.0037594	0.0487574	0.29893
GO:0050998	nitric-oxide synthase binding	molecular_function	binding	4	1178	19	16131	0.00339559	0.0453865	0.29893
GO:0051013	microtubule severing	biological_process	cellular component organization or biogenesis	2	1064	5	14236	0.0018797	0.0479403	0.29893
GO:0051091	positive regulation of DNA binding transcription factor activity	biological_process	biological regulation	21	1064	191	14236	0.0197368	0.0481105	0.29893
GO:0051387	negative regulation of neurotrophin TRK receptor signaling pathway	biological_process	biological regulation	2	1064	5	14236	0.0018797	0.0479403	0.29893
GO:0051412	response to corticosterone	biological_process	response to stimulus	4	1064	19	14236	0.0037594	0.0487574	0.29893
GO:0051891	positive regulation of cardioblast differentiation	biological_process	biological regulation	2	1064	5	14236	0.0018797	0.0479403	0.29893
GO:0052811	1-phosphatidylinositol-3-phosphate 4-kinase activity	molecular_function	catalytic activity	2	1178	5	16131	0.00169779	0.0459333	0.29893
GO:0055093	response to hyperoxia	biological_process	response to stimulus	4	1064	19	14236	0.0037594	0.0487574	0.29893
GO:0060211	regulation of nuclear-transcribed mRNA poly(A) tail shortening	biological_process	biological regulation	2	1064	5	14236	0.0018797	0.0479403	0.29893
GO:0061049	cell growth involved in cardiac muscle cell development	biological_process	cellular process	2	1064	5	14236	0.0018797	0.0479403	0.29893
GO:0070309	lens fiber cell morphogenesis	biological_process	cellular component organization or biogenesis	2	1064	5	14236	0.0018797	0.0479403	0.29893
GO:0070664	negative regulation of leukocyte proliferation	biological_process	biological regulation	8	1064	54	14236	0.0075188	0.0460235	0.29893
GO:0070697	activin receptor binding	molecular_function	binding	2	1178	5	16131	0.00169779	0.0459333	0.29893
GO:0071108	protein K48-linked deubiquitination	biological_process	cellular process	4	1064	19	14236	0.0037594	0.0487574	0.29893
GO:0072520	seminiferous tubule development	biological_process	multicellular organismal process	2	1064	5	14236	0.0018797	0.0479403	0.29893
GO:0090051	negative regulation of cell migration involved in sprouting angiogenesis	biological_process	biological regulation	2	1064	5	14236	0.0018797	0.0479403	0.29893
GO:0098727	maintenance of cell number	biological_process	developmental process	12	1064	94	14236	0.0112782	0.0469889	0.29893
GO:1900046	regulation of hemostasis	biological_process	biological regulation	9	1064	64	14236	0.00845865	0.0474615	0.29893
GO:1900101	regulation of endoplasmic reticulum unfolded protein response	biological_process	biological regulation	2	1064	5	14236	0.0018797	0.0479403	0.29893
GO:1900151	regulation of nuclear-transcribed mRNA catabolic process, deadenylation-dependent decay	biological_process	biological regulation	2	1064	5	14236	0.0018797	0.0479403	0.29893
GO:1902624	positive regulation of neutrophil migration	biological_process	biological regulation	4	1064	19	14236	0.0037594	0.0487574	0.29893
GO:1903318	negative regulation of protein maturation	biological_process	biological regulation	4	1064	19	14236	0.0037594	0.0487574	0.29893
GO:1903671	negative regulation of sprouting angiogenesis	biological_process	biological regulation	2	1064	5	14236	0.0018797	0.0479403	0.29893
GO:1905456	regulation of lymphoid progenitor cell differentiation	biological_process	biological regulation	2	1064	5	14236	0.0018797	0.0479403	0.29893
GO:1905897	regulation of response to endoplasmic reticulum stress	biological_process	biological regulation	2	1064	5	14236	0.0018797	0.0479403	0.29893
GO:2000249	regulation of actin cytoskeleton reorganization	biological_process	biological regulation	4	1064	19	14236	0.0037594	0.0487574	0.29893
GO:2000973	regulation of pro-B cell differentiation	biological_process	biological regulation	2	1064	5	14236	0.0018797	0.0479403	0.29893
GO:0009411	response to UV	biological_process	response to stimulus	13	1064	105	14236	0.012218	0.0490399	0.300113
GO:0034361	very-low-density lipoprotein particle	cellular_component	extracellular region	4	1230	20	17330	0.00325203	0.0490865	0.300113
GO:0034385	triglyceride-rich plasma lipoprotein particle	cellular_component	extracellular region	4	1230	20	17330	0.00325203	0.0490865	0.300113
GO:0070201	regulation of establishment of protein localization	biological_process	biological regulation	43	1064	445	14236	0.0404135	0.0491558	0.30031
GO:0090087	regulation of peptide transport	biological_process	biological regulation	44	1064	457	14236	0.0413534	0.0493888	0.301506
GO:0035148	tube formation	biological_process	multicellular organismal process	16	1064	137	14236	0.0150376	0.0496336	0.302321
GO:0035250	UDP-galactosyltransferase activity	molecular_function	catalytic activity	5	1178	28	16131	0.00424448	0.0496343	0.302321
GO:0043548	phosphatidylinositol 3-kinase binding	molecular_function	binding	5	1178	28	16131	0.00424448	0.0496343	0.302321
GO:0035326	enhancer binding	molecular_function	binding	12	1178	97	16131	0.0101868	0.0497622	0.302873
GO:0060333	interferon-gamma-mediated signaling pathway	biological_process	biological regulation	8	1064	55	14236	0.0075188	0.0504828	0.307028
GO:1903531	negative regulation of secretion by cell	biological_process	biological regulation	14	1064	116	14236	0.0131579	0.0505698	0.307326
GO:0032102	negative regulation of response to external stimulus	biological_process	biological regulation	19	1064	170	14236	0.0178571	0.0506252	0.307432
GO:0043410	positive regulation of MAPK cascade	biological_process	biological regulation	35	1064	352	14236	0.0328947	0.050695	0.307625
GO:0001085	RNA polymerase II transcription factor binding	molecular_function	binding	13	1178	108	16131	0.0110357	0.050935	0.308757
GO:0009894	regulation of catabolic process	biological_process	biological regulation	39	1064	399	14236	0.0366541	0.0509576	0.308757
GO:0001657	ureteric bud development	biological_process	multicellular organismal process	11	1064	85	14236	0.0103383	0.0512409	0.308856
GO:0005654	nucleoplasm	cellular_component	organelle part	233	1230	2980	17330	0.189431	0.0511324	0.308856
GO:0010675	regulation of cellular carbohydrate metabolic process	biological_process	biological regulation	11	1064	85	14236	0.0103383	0.0512409	0.308856
GO:0034364	high-density lipoprotein particle	cellular_component	extracellular region	5	1230	29	17330	0.00406504	0.0510803	0.308856
GO:0043901	negative regulation of multi-organism process	biological_process	biological regulation	11	1064	85	14236	0.0103383	0.0512409	0.308856
GO:0061564	axon development	biological_process	cellular component organization or biogenesis	45	1064	470	14236	0.0422932	0.0510389	0.308856
GO:1901654	response to ketone	biological_process	response to stimulus	11	1064	85	14236	0.0103383	0.0512409	0.308856
GO:0003208	cardiac ventricle morphogenesis	biological_process	multicellular organismal process	9	1064	65	14236	0.00845865	0.0515991	0.309633
GO:0008083	growth factor activity	molecular_function	molecular function regulator	18	1178	163	16131	0.0152801	0.0514509	0.309633
GO:0010634	positive regulation of epithelial cell migration	biological_process	biological regulation	9	1064	65	14236	0.00845865	0.0515991	0.309633
GO:0045744	negative regulation of G-protein coupled receptor protein signaling pathway	biological_process	biological regulation	9	1064	65	14236	0.00845865	0.0515991	0.309633
GO:0060322	head development	biological_process	developmental process	52	1064	554	14236	0.0488722	0.0515522	0.309633
GO:0060415	muscle tissue morphogenesis	biological_process	multicellular organismal process	9	1064	65	14236	0.00845865	0.0515991	0.309633
GO:0001161	intronic transcription regulatory region sequence-specific DNA binding	molecular_function	binding	3	1178	12	16131	0.00254669	0.0519706	0.310712
GO:0001223	transcription coactivator binding	molecular_function	binding	3	1178	12	16131	0.00254669	0.0519706	0.310712
GO:0016493	C-C chemokine receptor activity	molecular_function	signal transducer activity	3	1178	12	16131	0.00254669	0.0519706	0.310712
GO:0048185	activin binding	molecular_function	binding	3	1178	12	16131	0.00254669	0.0519706	0.310712
GO:0070410	co-SMAD binding	molecular_function	binding	3	1178	12	16131	0.00254669	0.0519706	0.310712
GO:0030426	growth cone	cellular_component	cell	16	1230	145	17330	0.0130081	0.0520491	0.310951
GO:0071216	cellular response to biotic stimulus	biological_process	cellular process	13	1064	106	14236	0.012218	0.052246	0.311897
GO:0032279	asymmetric synapse	cellular_component	synapse	18	1230	168	17330	0.0146341	0.0524009	0.3124
GO:1901652	response to peptide	biological_process	response to stimulus	35	1064	353	14236	0.0328947	0.0524073	0.3124
GO:0005770	late endosome	cellular_component	cell	22	1230	215	17330	0.0178862	0.0532866	0.317408
GO:0009896	positive regulation of catabolic process	biological_process	biological regulation	24	1064	227	14236	0.0225564	0.0534965	0.318372
GO:0042171	lysophosphatidic acid acyltransferase activity	molecular_function	catalytic activity	4	1178	20	16131	0.00339559	0.0535664	0.318372
GO:0071617	lysophospholipid acyltransferase activity	molecular_function	catalytic activity	4	1178	20	16131	0.00339559	0.0535664	0.318372
GO:0005518	collagen binding	molecular_function	binding	9	1178	67	16131	0.00764007	0.0538106	0.318959
GO:0007160	cell-matrix adhesion	biological_process	biological adhesion	12	1064	96	14236	0.0112782	0.0537462	0.318959
GO:0030374	ligand-dependent nuclear receptor transcription coactivator activity	molecular_function	transcription regulator activity	8	1178	57	16131	0.00679117	0.0539407	0.318959
GO:0034446	substrate adhesion-dependent cell spreading	biological_process	cellular component organization or biogenesis	5	1064	28	14236	0.00469925	0.0539014	0.318959
GO:0048635	negative regulation of muscle organ development	biological_process	biological regulation	5	1064	28	14236	0.00469925	0.0539014	0.318959
GO:0090311	regulation of protein deacetylation	biological_process	biological regulation	5	1064	28	14236	0.00469925	0.0539014	0.318959
GO:1901862	negative regulation of muscle tissue development	biological_process	biological regulation	5	1064	28	14236	0.00469925	0.0539014	0.318959
GO:0001889	liver development	biological_process	multicellular organismal process	11	1064	86	14236	0.0103383	0.054972	0.319021
GO:0006882	cellular zinc ion homeostasis	biological_process	biological regulation	3	1064	12	14236	0.00281955	0.0550538	0.319021
GO:0007205	protein kinase C-activating G-protein coupled receptor signaling pathway	biological_process	biological regulation	6	1064	37	14236	0.0056391	0.0545406	0.319021
GO:0009187	cyclic nucleotide metabolic process	biological_process	cellular process	6	1064	37	14236	0.0056391	0.0545406	0.319021
GO:0010613	positive regulation of cardiac muscle hypertrophy	biological_process	biological regulation	3	1064	12	14236	0.00281955	0.0550538	0.319021
GO:0014742	positive regulation of muscle hypertrophy	biological_process	biological regulation	3	1064	12	14236	0.00281955	0.0550538	0.319021
GO:0030514	negative regulation of BMP signaling pathway	biological_process	biological regulation	6	1064	37	14236	0.0056391	0.0545406	0.319021
GO:0030856	regulation of epithelial cell differentiation	biological_process	biological regulation	11	1064	86	14236	0.0103383	0.054972	0.319021
GO:0031935	regulation of chromatin silencing	biological_process	biological regulation	3	1064	12	14236	0.00281955	0.0550538	0.319021
GO:0032656	regulation of interleukin-13 production	biological_process	biological regulation	3	1064	12	14236	0.00281955	0.0550538	0.319021
GO:0042574	retinal metabolic process	biological_process	cellular process	3	1064	12	14236	0.00281955	0.0550538	0.319021
GO:0043302	positive regulation of leukocyte degranulation	biological_process	biological regulation	3	1064	12	14236	0.00281955	0.0550538	0.319021
GO:0043392	negative regulation of DNA binding	biological_process	biological regulation	6	1064	37	14236	0.0056391	0.0545406	0.319021
GO:0043517	positive regulation of DNA damage response, signal transduction by p53 class mediator	biological_process	biological regulation	3	1064	12	14236	0.00281955	0.0550538	0.319021
GO:0043618	regulation of transcription from RNA polymerase II promoter in response to stress	biological_process	biological regulation	6	1064	37	14236	0.0056391	0.0545406	0.319021
GO:0043922	negative regulation by host of viral transcription	biological_process	biological regulation	3	1064	12	14236	0.00281955	0.0550538	0.319021
GO:0045060	negative thymic T cell selection	biological_process	cellular process	3	1064	12	14236	0.00281955	0.0550538	0.319021
GO:0045346	regulation of MHC class II biosynthetic process	biological_process	biological regulation	3	1064	12	14236	0.00281955	0.0550538	0.319021
GO:0045920	negative regulation of exocytosis	biological_process	biological regulation	3	1064	12	14236	0.00281955	0.0550538	0.319021
GO:0046321	positive regulation of fatty acid oxidation	biological_process	biological regulation	3	1064	12	14236	0.00281955	0.0550538	0.319021
GO:0046851	negative regulation of bone remodeling	biological_process	biological regulation	3	1064	12	14236	0.00281955	0.0550538	0.319021
GO:0050857	positive regulation of antigen receptor-mediated signaling pathway	biological_process	biological regulation	3	1064	12	14236	0.00281955	0.0550538	0.319021
GO:0055069	zinc ion homeostasis	biological_process	biological regulation	3	1064	12	14236	0.00281955	0.0550538	0.319021
GO:0060413	atrial septum morphogenesis	biological_process	multicellular organismal process	3	1064	12	14236	0.00281955	0.0550538	0.319021
GO:0060999	positive regulation of dendritic spine development	biological_process	biological regulation	3	1064	12	14236	0.00281955	0.0550538	0.319021
GO:0090075	relaxation of muscle	biological_process	multicellular organismal process	3	1064	12	14236	0.00281955	0.0550538	0.319021
GO:0090192	regulation of glomerulus development	biological_process	biological regulation	3	1064	12	14236	0.00281955	0.0550538	0.319021
GO:1901798	positive regulation of signal transduction by p53 class mediator	biological_process	biological regulation	3	1064	12	14236	0.00281955	0.0550538	0.319021
GO:0000788	nuclear nucleosome	cellular_component	organelle part	6	1230	39	17330	0.00487805	0.0551728	0.319253
GO:0004860	protein kinase inhibitor activity	molecular_function	molecular function regulator	11	1178	88	16131	0.00933786	0.0551334	0.319253
GO:0008092	cytoskeletal protein binding	molecular_function	binding	73	1178	831	16131	0.0619694	0.0556911	0.322022
GO:0071214	cellular response to abiotic stimulus	biological_process	cellular process	18	1064	161	14236	0.0169173	0.0558199	0.322537
GO:0034654	nucleobase-containing compound biosynthetic process	biological_process	cellular process	70	1064	776	14236	0.0657895	0.056017	0.323445
GO:0048699	generation of neurons	biological_process	cellular process	97	1064	1110	14236	0.0911654	0.0560759	0.323555
GO:0030554	adenyl nucleotide binding	molecular_function	binding	127	1178	1520	16131	0.10781	0.0561472	0.323736
GO:0042169	SH2 domain binding	molecular_function	binding	5	1178	29	16131	0.00424448	0.0565125	0.324917
GO:0042287	MHC protein binding	molecular_function	binding	5	1178	29	16131	0.00424448	0.0565125	0.324917
GO:0043425	bHLH transcription factor binding	molecular_function	binding	5	1178	29	16131	0.00424448	0.0565125	0.324917
GO:0051493	regulation of cytoskeleton organization	biological_process	biological regulation	28	1064	274	14236	0.0263158	0.0564757	0.324917
GO:0003071	renal system process involved in regulation of systemic arterial blood pressure	biological_process	biological regulation	4	1064	20	14236	0.0037594	0.05747	0.326941
GO:0016925	protein sumoylation	biological_process	cellular process	4	1064	20	14236	0.0037594	0.05747	0.326941
GO:0030728	ovulation	biological_process	multi-organism process	4	1064	20	14236	0.0037594	0.05747	0.326941
GO:0033006	regulation of mast cell activation involved in immune response	biological_process	biological regulation	4	1064	20	14236	0.0037594	0.05747	0.326941
GO:0042116	macrophage activation	biological_process	cellular process	4	1064	20	14236	0.0037594	0.05747	0.326941
GO:0042472	inner ear morphogenesis	biological_process	multicellular organismal process	12	1064	97	14236	0.0112782	0.057359	0.326941
GO:0043491	protein kinase B signaling	biological_process	biological regulation	4	1064	20	14236	0.0037594	0.05747	0.326941
GO:0043534	blood vessel endothelial cell migration	biological_process	cellular process	4	1064	20	14236	0.0037594	0.05747	0.326941
GO:0045214	sarcomere organization	biological_process	cellular component organization or biogenesis	4	1064	20	14236	0.0037594	0.05747	0.326941
GO:0045577	regulation of B cell differentiation	biological_process	biological regulation	4	1064	20	14236	0.0037594	0.05747	0.326941
GO:0045773	positive regulation of axon extension	biological_process	biological regulation	4	1064	20	14236	0.0037594	0.05747	0.326941
GO:0050996	positive regulation of lipid catabolic process	biological_process	biological regulation	4	1064	20	14236	0.0037594	0.05747	0.326941
GO:0051898	negative regulation of protein kinase B signaling	biological_process	biological regulation	4	1064	20	14236	0.0037594	0.05747	0.326941
GO:0071624	positive regulation of granulocyte chemotaxis	biological_process	biological regulation	4	1064	20	14236	0.0037594	0.05747	0.326941
GO:0072331	signal transduction by p53 class mediator	biological_process	biological regulation	14	1064	118	14236	0.0131579	0.0569088	0.326941
GO:0022604	regulation of cell morphogenesis	biological_process	biological regulation	27	1064	263	14236	0.0253759	0.057511	0.326945
GO:0005524	ATP binding	molecular_function	binding	123	1178	1470	16131	0.104414	0.0575517	0.326947
GO:0032559	adenyl ribonucleotide binding	molecular_function	binding	126	1178	1509	16131	0.106961	0.0578345	0.328094
GO:0072330	monocarboxylic acid biosynthetic process	biological_process	cellular process	15	1064	129	14236	0.0140977	0.0577969	0.328094
GO:0008138	protein tyrosine/serine/threonine phosphatase activity	molecular_function	catalytic activity	7	1178	48	16131	0.00594228	0.0581195	0.329479
GO:0000980	RNA polymerase II distal enhancer sequence-specific DNA binding	molecular_function	binding	9	1178	68	16131	0.00764007	0.0581865	0.329628
GO:0010595	positive regulation of endothelial cell migration	biological_process	biological regulation	7	1064	47	14236	0.00657895	0.0584724	0.330324
GO:0014068	positive regulation of phosphatidylinositol 3-kinase signaling	biological_process	biological regulation	7	1064	47	14236	0.00657895	0.0584724	0.330324
GO:0033157	regulation of intracellular protein transport	biological_process	biological regulation	19	1064	173	14236	0.0178571	0.0584497	0.330324
GO:0060135	maternal process involved in female pregnancy	biological_process	multi-organism process	7	1064	47	14236	0.00657895	0.0584724	0.330324
GO:0006644	phospholipid metabolic process	biological_process	cellular process	33	1064	333	14236	0.031015	0.0585697	0.330546
GO:0048872	homeostasis of number of cells	biological_process	biological regulation	17	1064	151	14236	0.0159774	0.0585932	0.330546
GO:0001959	regulation of cytokine-mediated signaling pathway	biological_process	biological regulation	11	1064	87	14236	0.0103383	0.0588798	0.33147
GO:0008289	lipid binding	molecular_function	binding	60	1178	671	16131	0.0509338	0.0588759	0.33147
GO:0050707	regulation of cytokine secretion	biological_process	biological regulation	11	1064	87	14236	0.0103383	0.0588798	0.33147
GO:0008277	regulation of G-protein coupled receptor protein signaling pathway	biological_process	biological regulation	13	1064	108	14236	0.012218	0.0590812	0.332142
GO:0071695	anatomical structure maturation	biological_process	developmental process	13	1064	108	14236	0.012218	0.0590812	0.332142
GO:0032069	regulation of nuclease activity	biological_process	biological regulation	10	1064	77	14236	0.0093985	0.060017	0.336935
GO:0060021	palate development	biological_process	developmental process	10	1064	77	14236	0.0093985	0.060017	0.336935
GO:0043292	contractile fiber	cellular_component	cell	22	1230	218	17330	0.0178862	0.060224	0.337863
GO:0034644	cellular response to UV	biological_process	cellular process	6	1064	38	14236	0.0056391	0.0608518	0.340913
GO:0060324	face development	biological_process	developmental process	6	1064	38	14236	0.0056391	0.0608518	0.340913
GO:0007435	salivary gland morphogenesis	biological_process	multicellular organismal process	5	1064	29	14236	0.00469925	0.0612893	0.341241
GO:0008333	endosome to lysosome transport	biological_process	localization	5	1064	29	14236	0.00469925	0.0612893	0.341241
GO:0010822	positive regulation of mitochondrion organization	biological_process	biological regulation	5	1064	29	14236	0.00469925	0.0612893	0.341241
GO:0022408	negative regulation of cell-cell adhesion	biological_process	biological regulation	12	1064	98	14236	0.0112782	0.0611307	0.341241
GO:0034330	cell junction organization	biological_process	cellular component organization or biogenesis	19	1064	174	14236	0.0178571	0.0612353	0.341241
GO:0035065	regulation of histone acetylation	biological_process	biological regulation	5	1064	29	14236	0.00469925	0.0612893	0.341241
GO:0045600	positive regulation of fat cell differentiation	biological_process	biological regulation	5	1064	29	14236	0.00469925	0.0612893	0.341241
GO:0050691	regulation of defense response to virus by host	biological_process	biological regulation	5	1064	29	14236	0.00469925	0.0612893	0.341241
GO:0060396	growth hormone receptor signaling pathway	biological_process	biological regulation	5	1064	29	14236	0.00469925	0.0612893	0.341241
GO:0030323	respiratory tube development	biological_process	multicellular organismal process	18	1064	163	14236	0.0169173	0.0615096	0.342231
GO:0051223	regulation of protein transport	biological_process	biological regulation	42	1064	441	14236	0.0394737	0.06181	0.343431
GO:0060284	regulation of cell development	biological_process	biological regulation	42	1064	441	14236	0.0394737	0.06181	0.343431
GO:0008024	cyclin/CDK positive transcription elongation factor complex	cellular_component	organelle part	2	1230	6	17330	0.00162602	0.0623305	0.345849
GO:0051286	cell tip	cellular_component	cell	2	1230	6	17330	0.00162602	0.0623305	0.345849
GO:0008373	sialyltransferase activity	molecular_function	catalytic activity	4	1178	21	16131	0.00339559	0.0624886	0.346015
GO:0043325	phosphatidylinositol-3,4-bisphosphate binding	molecular_function	binding	4	1178	21	16131	0.00339559	0.0624886	0.346015
GO:0051184	cofactor transmembrane transporter activity	molecular_function	transporter activity	4	1178	21	16131	0.00339559	0.0624886	0.346015
GO:0003779	actin binding	molecular_function	binding	38	1178	403	16131	0.0322581	0.0627486	0.347217
GO:0006029	proteoglycan metabolic process	biological_process	cellular process	11	1064	88	14236	0.0103383	0.0629665	0.347711
GO:0061008	hepaticobiliary system development	biological_process	multicellular organismal process	11	1064	88	14236	0.0103383	0.0629665	0.347711
GO:0090090	negative regulation of canonical Wnt signaling pathway	biological_process	biological regulation	11	1064	88	14236	0.0103383	0.0629665	0.347711
GO:0004523	RNA-DNA hybrid ribonuclease activity	molecular_function	catalytic activity	3	1178	13	16131	0.00254669	0.0640031	0.35128
GO:0005769	early endosome	cellular_component	cell	29	1230	304	17330	0.0235772	0.063909	0.35128
GO:0008195	phosphatidate phosphatase activity	molecular_function	catalytic activity	3	1178	13	16131	0.00254669	0.0640031	0.35128
GO:0008610	lipid biosynthetic process	biological_process	metabolic process	44	1064	466	14236	0.0413534	0.0637614	0.35128
GO:0009982	pseudouridine synthase activity	molecular_function	catalytic activity	3	1178	13	16131	0.00254669	0.0640031	0.35128
GO:0032388	positive regulation of intracellular transport	biological_process	biological regulation	14	1064	120	14236	0.0131579	0.063768	0.35128
GO:0043225	ATPase-coupled anion transmembrane transporter activity	molecular_function	transporter activity	3	1178	13	16131	0.00254669	0.0640031	0.35128
GO:0044213	intronic transcription regulatory region DNA binding	molecular_function	binding	3	1178	13	16131	0.00254669	0.0640031	0.35128
GO:0055123	digestive system development	biological_process	multicellular organismal process	14	1064	120	14236	0.0131579	0.063768	0.35128
GO:0003229	ventricular cardiac muscle tissue development	biological_process	multicellular organismal process	7	1064	48	14236	0.00657895	0.0642453	0.352127
GO:0006897	endocytosis	biological_process	localization	27	1064	266	14236	0.0253759	0.0642879	0.352127
GO:0050810	regulation of steroid biosynthetic process	biological_process	biological regulation	7	1064	48	14236	0.00657895	0.0642453	0.352127
GO:0006354	DNA-templated transcription, elongation	biological_process	cellular process	10	1064	78	14236	0.0093985	0.064456	0.352571
GO:0021510	spinal cord development	biological_process	multicellular organismal process	10	1064	78	14236	0.0093985	0.064456	0.352571
GO:0000098	sulfur amino acid catabolic process	biological_process	cellular process	3	1064	13	14236	0.00281955	0.0677162	0.353181
GO:0001573	ganglioside metabolic process	biological_process	cellular process	3	1064	13	14236	0.00281955	0.0677162	0.353181
GO:0001842	neural fold formation	biological_process	multicellular organismal process	2	1064	6	14236	0.0018797	0.068404	0.353181
GO:0001880	Mullerian duct regression	biological_process	multicellular organismal process	2	1064	6	14236	0.0018797	0.068404	0.353181
GO:0002042	cell migration involved in sprouting angiogenesis	biological_process	cellular process	3	1064	13	14236	0.00281955	0.0677162	0.353181
GO:0003160	endocardium morphogenesis	biological_process	multicellular organismal process	2	1064	6	14236	0.0018797	0.068404	0.353181
GO:0003308	negative regulation of Wnt signaling pathway involved in heart development	biological_process	biological regulation	2	1064	6	14236	0.0018797	0.068404	0.353181
GO:0004704	NF-kappaB-inducing kinase activity	molecular_function	signal transducer activity	2	1178	6	16131	0.00169779	0.0656152	0.353181
GO:0006878	cellular copper ion homeostasis	biological_process	biological regulation	3	1064	13	14236	0.00281955	0.0677162	0.353181
GO:0007184	SMAD protein import into nucleus	biological_process	biological regulation	2	1064	6	14236	0.0018797	0.068404	0.353181
GO:0007417	central nervous system development	biological_process	multicellular organismal process	64	1064	710	14236	0.0601504	0.0661038	0.353181
GO:0009642	response to light intensity	biological_process	response to stimulus	2	1064	6	14236	0.0018797	0.068404	0.353181
GO:0010871	negative regulation of receptor biosynthetic process	biological_process	biological regulation	2	1064	6	14236	0.0018797	0.068404	0.353181
GO:0015886	heme transport	biological_process	localization	2	1064	6	14236	0.0018797	0.068404	0.353181
GO:0016788	hydrolase activity, acting on ester bonds	molecular_function	catalytic activity	66	1178	752	16131	0.0560272	0.0671284	0.353181
GO:0019210	kinase inhibitor activity	molecular_function	molecular function regulator	11	1178	91	16131	0.00933786	0.0671048	0.353181
GO:0021819	layer formation in cerebral cortex	biological_process	cellular process	2	1064	6	14236	0.0018797	0.068404	0.353181
GO:0022029	telencephalon cell migration	biological_process	cellular process	6	1064	39	14236	0.0056391	0.0675776	0.353181
GO:0030948	negative regulation of vascular endothelial growth factor receptor signaling pathway	biological_process	biological regulation	2	1064	6	14236	0.0018797	0.068404	0.353181
GO:0031392	regulation of prostaglandin biosynthetic process	biological_process	biological regulation	2	1064	6	14236	0.0018797	0.068404	0.353181
GO:0031954	positive regulation of protein autophosphorylation	biological_process	biological regulation	3	1064	13	14236	0.00281955	0.0677162	0.353181
GO:0032462	regulation of protein homooligomerization	biological_process	biological regulation	3	1064	13	14236	0.00281955	0.0677162	0.353181
GO:0032463	negative regulation of protein homooligomerization	biological_process	biological regulation	2	1064	6	14236	0.0018797	0.068404	0.353181
GO:0032754	positive regulation of interleukin-5 production	biological_process	biological regulation	2	1064	6	14236	0.0018797	0.068404	0.353181
GO:0034135	regulation of toll-like receptor 2 signaling pathway	biological_process	biological regulation	2	1064	6	14236	0.0018797	0.068404	0.353181
GO:0034145	positive regulation of toll-like receptor 4 signaling pathway	biological_process	biological regulation	2	1064	6	14236	0.0018797	0.068404	0.353181
GO:0034372	very-low-density lipoprotein particle remodeling	biological_process	cellular component organization or biogenesis	2	1064	6	14236	0.0018797	0.068404	0.353181
GO:0034614	cellular response to reactive oxygen species	biological_process	cellular process	8	1064	58	14236	0.0075188	0.0654919	0.353181
GO:0034983	peptidyl-lysine deacetylation	biological_process	cellular process	2	1064	6	14236	0.0018797	0.068404	0.353181
GO:0035612	AP-2 adaptor complex binding	molecular_function	binding	2	1178	6	16131	0.00169779	0.0656152	0.353181
GO:0036295	cellular response to increased oxygen levels	biological_process	cellular process	2	1064	6	14236	0.0018797	0.068404	0.353181
GO:0042059	negative regulation of epidermal growth factor receptor signaling pathway	biological_process	biological regulation	6	1064	39	14236	0.0056391	0.0675776	0.353181
GO:0042063	gliogenesis	biological_process	cellular process	17	1064	153	14236	0.0159774	0.0647056	0.353181
GO:0042996	regulation of Golgi to plasma membrane protein transport	biological_process	biological regulation	2	1064	6	14236	0.0018797	0.068404	0.353181
GO:0043184	vascular endothelial growth factor receptor 2 binding	molecular_function	binding	2	1178	6	16131	0.00169779	0.0656152	0.353181
GO:0043383	negative T cell selection	biological_process	cellular process	3	1064	13	14236	0.00281955	0.0677162	0.353181
GO:0043476	pigment accumulation	biological_process	response to stimulus	2	1064	6	14236	0.0018797	0.068404	0.353181
GO:0043482	cellular pigment accumulation	biological_process	cellular process	2	1064	6	14236	0.0018797	0.068404	0.353181
GO:0043570	maintenance of DNA repeat elements	biological_process	cellular component organization or biogenesis	2	1064	6	14236	0.0018797	0.068404	0.353181
GO:0043616	keratinocyte proliferation	biological_process	cell proliferation	3	1064	13	14236	0.00281955	0.0677162	0.353181
GO:0044853	plasma membrane raft	cellular_component	cell	11	1230	93	17330	0.00894309	0.064773	0.353181
GO:0045073	regulation of chemokine biosynthetic process	biological_process	biological regulation	3	1064	13	14236	0.00281955	0.0677162	0.353181
GO:0045197	establishment or maintenance of epithelial cell apical/basal polarity	biological_process	cellular process	3	1064	13	14236	0.00281955	0.0677162	0.353181
GO:0045322	unmethylated CpG binding	molecular_function	binding	2	1178	6	16131	0.00169779	0.0656152	0.353181
GO:0045343	regulation of MHC class I biosynthetic process	biological_process	biological regulation	2	1064	6	14236	0.0018797	0.068404	0.353181
GO:0045616	regulation of keratinocyte differentiation	biological_process	biological regulation	4	1064	21	14236	0.0037594	0.0669558	0.353181
GO:0045736	negative regulation of cyclin-dependent protein serine/threonine kinase activity	biological_process	biological regulation	4	1064	21	14236	0.0037594	0.0669558	0.353181
GO:0045939	negative regulation of steroid metabolic process	biological_process	biological regulation	4	1064	21	14236	0.0037594	0.0669558	0.353181
GO:0045986	negative regulation of smooth muscle contraction	biological_process	biological regulation	3	1064	13	14236	0.00281955	0.0677162	0.353181
GO:0045988	negative regulation of striated muscle contraction	biological_process	biological regulation	2	1064	6	14236	0.0018797	0.068404	0.353181
GO:0046058	cAMP metabolic process	biological_process	cellular process	4	1064	21	14236	0.0037594	0.0669558	0.353181
GO:0046916	cellular transition metal ion homeostasis	biological_process	biological regulation	11	1064	89	14236	0.0103383	0.0672341	0.353181
GO:0048102	autophagic cell death	biological_process	cellular process	2	1064	6	14236	0.0018797	0.068404	0.353181
GO:0048745	smooth muscle tissue development	biological_process	developmental process	4	1064	21	14236	0.0037594	0.0669558	0.353181
GO:0051181	cofactor transport	biological_process	localization	4	1064	21	14236	0.0037594	0.0669558	0.353181
GO:0055026	negative regulation of cardiac muscle tissue development	biological_process	biological regulation	3	1064	13	14236	0.00281955	0.0677162	0.353181
GO:0055119	relaxation of cardiac muscle	biological_process	multicellular organismal process	2	1064	6	14236	0.0018797	0.068404	0.353181
GO:0060028	convergent extension involved in axis elongation	biological_process	growth	2	1064	6	14236	0.0018797	0.068404	0.353181
GO:0060087	relaxation of vascular smooth muscle	biological_process	biological regulation	2	1064	6	14236	0.0018797	0.068404	0.353181
GO:0060613	fat pad development	biological_process	multicellular organismal process	2	1064	6	14236	0.0018797	0.068404	0.353181
GO:0060666	dichotomous subdivision of terminal units involved in salivary gland branching	biological_process	multicellular organismal process	2	1064	6	14236	0.0018797	0.068404	0.353181
GO:0060696	regulation of phospholipid catabolic process	biological_process	biological regulation	2	1064	6	14236	0.0018797	0.068404	0.353181
GO:0060897	neural plate regionalization	biological_process	multicellular organismal process	2	1064	6	14236	0.0018797	0.068404	0.353181
GO:0060907	positive regulation of macrophage cytokine production	biological_process	biological regulation	2	1064	6	14236	0.0018797	0.068404	0.353181
GO:0070307	lens fiber cell development	biological_process	cellular process	3	1064	13	14236	0.00281955	0.0677162	0.353181
GO:0070857	regulation of bile acid biosynthetic process	biological_process	biological regulation	2	1064	6	14236	0.0018797	0.068404	0.353181
GO:0071071	regulation of phospholipid biosynthetic process	biological_process	biological regulation	2	1064	6	14236	0.0018797	0.068404	0.353181
GO:0071222	cellular response to lipopolysaccharide	biological_process	multi-organism process	11	1064	89	14236	0.0103383	0.0672341	0.353181
GO:0071305	cellular response to vitamin D	biological_process	cellular process	2	1064	6	14236	0.0018797	0.068404	0.353181
GO:0071455	cellular response to hyperoxia	biological_process	cellular process	2	1064	6	14236	0.0018797	0.068404	0.353181
GO:0090050	positive regulation of cell migration involved in sprouting angiogenesis	biological_process	biological regulation	2	1064	6	14236	0.0018797	0.068404	0.353181
GO:0090103	cochlea morphogenesis	biological_process	multicellular organismal process	4	1064	21	14236	0.0037594	0.0669558	0.353181
GO:0090179	planar cell polarity pathway involved in neural tube closure	biological_process	biological regulation	3	1064	13	14236	0.00281955	0.0677162	0.353181
GO:0090205	positive regulation of cholesterol metabolic process	biological_process	biological regulation	2	1064	6	14236	0.0018797	0.068404	0.353181
GO:0090381	regulation of heart induction	biological_process	biological regulation	2	1064	6	14236	0.0018797	0.068404	0.353181
GO:0097066	response to thyroid hormone	biological_process	response to stimulus	3	1064	13	14236	0.00281955	0.0677162	0.353181
GO:0097371	MDM2/MDM4 family protein binding	molecular_function	binding	2	1178	6	16131	0.00169779	0.0656152	0.353181
GO:1901185	negative regulation of ERBB signaling pathway	biological_process	biological regulation	6	1064	39	14236	0.0056391	0.0675776	0.353181
GO:1903076	regulation of protein localization to plasma membrane	biological_process	biological regulation	2	1064	6	14236	0.0018797	0.068404	0.353181
GO:1903672	positive regulation of sprouting angiogenesis	biological_process	biological regulation	2	1064	6	14236	0.0018797	0.068404	0.353181
GO:1903726	negative regulation of phospholipid metabolic process	biological_process	biological regulation	2	1064	6	14236	0.0018797	0.068404	0.353181
GO:1904030	negative regulation of cyclin-dependent protein kinase activity	biological_process	biological regulation	4	1064	21	14236	0.0037594	0.0669558	0.353181
GO:1904251	regulation of bile acid metabolic process	biological_process	biological regulation	2	1064	6	14236	0.0018797	0.068404	0.353181
GO:1904375	regulation of protein localization to cell periphery	biological_process	biological regulation	2	1064	6	14236	0.0018797	0.068404	0.353181
GO:2000484	positive regulation of interleukin-8 secretion	biological_process	biological regulation	2	1064	6	14236	0.0018797	0.068404	0.353181
GO:2000725	regulation of cardiac muscle cell differentiation	biological_process	biological regulation	3	1064	13	14236	0.00281955	0.0677162	0.353181
GO:2000778	positive regulation of interleukin-6 secretion	biological_process	biological regulation	2	1064	6	14236	0.0018797	0.068404	0.353181
GO:2001279	regulation of unsaturated fatty acid biosynthetic process	biological_process	biological regulation	2	1064	6	14236	0.0018797	0.068404	0.353181
GO:0002576	platelet degranulation	biological_process	cellular process	10	1064	79	14236	0.0093985	0.0691004	0.355809
GO:0006109	regulation of carbohydrate metabolic process	biological_process	biological regulation	12	1064	100	14236	0.0112782	0.0691578	0.355809
GO:0010633	negative regulation of epithelial cell migration	biological_process	biological regulation	5	1064	30	14236	0.00469925	0.0692205	0.355809
GO:0045604	regulation of epidermal cell differentiation	biological_process	biological regulation	5	1064	30	14236	0.00469925	0.0692205	0.355809
GO:0071277	cellular response to calcium ion	biological_process	cellular process	5	1064	30	14236	0.00469925	0.0692205	0.355809
GO:0071378	cellular response to growth hormone stimulus	biological_process	cellular process	5	1064	30	14236	0.00469925	0.0692205	0.355809
GO:0090175	regulation of establishment of planar polarity	biological_process	biological regulation	5	1064	30	14236	0.00469925	0.0692205	0.355809
GO:0003713	transcription coactivator activity	molecular_function	transcription regulator activity	30	1178	310	16131	0.0254669	0.0694659	0.356844
GO:0008375	acetylglucosaminyltransferase activity	molecular_function	catalytic activity	7	1178	50	16131	0.00594228	0.069658	0.357604
GO:0031981	nuclear lumen	cellular_component	organelle part	274	1230	3568	17330	0.222764	0.0700698	0.35949
GO:0006987	activation of signaling protein activity involved in unfolded protein response	biological_process	biological regulation	9	1064	69	14236	0.00845865	0.0704706	0.359951
GO:0033077	T cell differentiation in thymus	biological_process	cellular process	7	1064	49	14236	0.00657895	0.0703514	0.359951
GO:0048565	digestive tract development	biological_process	multicellular organismal process	13	1064	111	14236	0.012218	0.0704185	0.359951
GO:0051384	response to glucocorticoid	biological_process	response to stimulus	13	1064	111	14236	0.012218	0.0704185	0.359951
GO:0060070	canonical Wnt signaling pathway	biological_process	biological regulation	9	1064	69	14236	0.00845865	0.0704706	0.359951
GO:0060675	ureteric bud morphogenesis	biological_process	multicellular organismal process	7	1064	49	14236	0.00657895	0.0703514	0.359951
GO:0070167	regulation of biomineral tissue development	biological_process	biological regulation	9	1064	69	14236	0.00845865	0.0704706	0.359951
GO:0001503	ossification	biological_process	multicellular organismal process	18	1064	166	14236	0.0169173	0.0707722	0.361264
GO:0030215	semaphorin receptor binding	molecular_function	binding	4	1178	22	16131	0.00339559	0.0721393	0.36801
GO:0001618	virus receptor activity	molecular_function	hijacked molecular function	9	1178	71	16131	0.00764007	0.0726568	0.370417
GO:0045095	keratin filament	cellular_component	organelle part	11	1230	95	17330	0.00894309	0.0731625	0.37276
GO:0045444	fat cell differentiation	biological_process	cellular process	10	1064	80	14236	0.0093985	0.0739517	0.376545
GO:0016043	cellular component organization	biological_process	cellular component organization or biogenesis	278	1064	3453	14236	0.261278	0.0751355	0.382332
GO:0031295	T cell costimulation	biological_process	biological regulation	9	1064	70	14236	0.00845865	0.0757792	0.385366
GO:0030900	forebrain development	biological_process	multicellular organismal process	29	1064	294	14236	0.0272556	0.0758541	0.385417
GO:0044449	contractile fiber part	cellular_component	organelle part	20	1230	200	17330	0.0162602	0.0758845	0.385417
GO:0000060	protein import into nucleus, translocation	biological_process	localization	4	1064	22	14236	0.0037594	0.0771974	0.388674
GO:0002698	negative regulation of immune effector process	biological_process	biological regulation	8	1064	60	14236	0.0075188	0.0768806	0.388674
GO:0005041	low-density lipoprotein receptor activity	molecular_function	molecular transducer activity	3	1178	14	16131	0.00254669	0.0771865	0.388674
GO:0030511	positive regulation of transforming growth factor beta receptor signaling pathway	biological_process	biological regulation	4	1064	22	14236	0.0037594	0.0771974	0.388674
GO:0032036	myosin heavy chain binding	molecular_function	binding	3	1178	14	16131	0.00254669	0.0771865	0.388674
GO:0045638	negative regulation of myeloid cell differentiation	biological_process	biological regulation	8	1064	60	14236	0.0075188	0.0768806	0.388674
GO:0046903	secretion	biological_process	localization	42	1064	449	14236	0.0394737	0.0770461	0.388674
GO:0048821	erythrocyte development	biological_process	biological regulation	4	1064	22	14236	0.0037594	0.0771974	0.388674
GO:0050715	positive regulation of cytokine secretion	biological_process	biological regulation	8	1064	60	14236	0.0075188	0.0768806	0.388674
GO:0070016	armadillo repeat domain binding	molecular_function	binding	3	1178	14	16131	0.00254669	0.0771865	0.388674
GO:0090200	positive regulation of release of cytochrome c from mitochondria	biological_process	biological regulation	4	1064	22	14236	0.0037594	0.0771974	0.388674
GO:0090263	positive regulation of canonical Wnt signaling pathway	biological_process	biological regulation	7	1064	50	14236	0.00657895	0.076791	0.388674
GO:1903846	positive regulation of cellular response to transforming growth factor beta stimulus	biological_process	biological regulation	4	1064	22	14236	0.0037594	0.0771974	0.388674
GO:1905269	positive regulation of chromatin organization	biological_process	biological regulation	7	1064	50	14236	0.00657895	0.076791	0.388674
GO:0001702	gastrulation with mouth forming second	biological_process	multicellular organismal process	5	1064	31	14236	0.00469925	0.0776897	0.389857
GO:0032233	positive regulation of actin filament bundle assembly	biological_process	biological regulation	5	1064	31	14236	0.00469925	0.0776897	0.389857
GO:0042304	regulation of fatty acid biosynthetic process	biological_process	biological regulation	5	1064	31	14236	0.00469925	0.0776897	0.389857
GO:0060761	negative regulation of response to cytokine stimulus	biological_process	biological regulation	5	1064	31	14236	0.00469925	0.0776897	0.389857
GO:0097306	cellular response to alcohol	biological_process	cellular process	5	1064	31	14236	0.00469925	0.0776897	0.389857
GO:1904951	positive regulation of establishment of protein localization	biological_process	biological regulation	23	1064	225	14236	0.0216165	0.0777212	0.389857
GO:0007163	establishment or maintenance of cell polarity	biological_process	cellular process	12	1064	102	14236	0.0112782	0.0778396	0.389968
GO:0021543	pallium development	biological_process	multicellular organismal process	12	1064	102	14236	0.0112782	0.0778396	0.389968
GO:0034728	nucleosome organization	biological_process	cellular component organization or biogenesis	16	1064	146	14236	0.0150376	0.0787588	0.394329
GO:0048015	phosphatidylinositol-mediated signaling	biological_process	biological regulation	10	1064	81	14236	0.0093985	0.079011	0.394617
GO:0048017	inositol lipid-mediated signaling	biological_process	biological regulation	10	1064	81	14236	0.0093985	0.079011	0.394617
GO:0050921	positive regulation of chemotaxis	biological_process	biological regulation	10	1064	81	14236	0.0093985	0.079011	0.394617
GO:2001251	negative regulation of chromosome organization	biological_process	biological regulation	10	1064	81	14236	0.0093985	0.079011	0.394617
GO:0031093	platelet alpha granule lumen	cellular_component	organelle part	7	1230	53	17330	0.00569106	0.079459	0.396609
GO:0045177	apical part of cell	cellular_component	cell	34	1230	373	17330	0.0276423	0.079658	0.397358
GO:0019199	transmembrane receptor protein kinase activity	molecular_function	signal transducer activity	10	1178	83	16131	0.00848896	0.0797659	0.397651
GO:0030291	protein serine/threonine kinase inhibitor activity	molecular_function	molecular function regulator	5	1178	32	16131	0.00424448	0.0802481	0.399318
GO:0030666	endocytic vesicle membrane	cellular_component	organelle part	16	1230	154	17330	0.0130081	0.0802407	0.399318
GO:0031624	ubiquitin conjugating enzyme binding	molecular_function	binding	5	1178	32	16131	0.00424448	0.0802481	0.399318
GO:0000307	cyclin-dependent protein kinase holoenzyme complex	cellular_component	cell	5	1230	33	17330	0.00406504	0.0811158	0.39973
GO:0001977	renal system process involved in regulation of blood volume	biological_process	biological regulation	3	1064	14	14236	0.00281955	0.0815644	0.39973
GO:0002832	negative regulation of response to biotic stimulus	biological_process	biological regulation	3	1064	14	14236	0.00281955	0.0815644	0.39973
GO:0005057	signal transducer activity, downstream of receptor	molecular_function	signal transducer activity	16	1178	150	16131	0.0135823	0.0811829	0.39973
GO:0006198	cAMP catabolic process	biological_process	cellular process	3	1064	14	14236	0.00281955	0.0815644	0.39973
GO:0010837	regulation of keratinocyte proliferation	biological_process	biological regulation	3	1064	14	14236	0.00281955	0.0815644	0.39973
GO:0030054	cell junction	cellular_component	cell junction	98	1230	1203	17330	0.0796748	0.0811537	0.39973
GO:0031294	lymphocyte costimulation	biological_process	biological regulation	9	1064	71	14236	0.00845865	0.0813265	0.39973
GO:0032075	positive regulation of nuclease activity	biological_process	biological regulation	9	1064	71	14236	0.00845865	0.0813265	0.39973
GO:0032674	regulation of interleukin-5 production	biological_process	biological regulation	3	1064	14	14236	0.00281955	0.0815644	0.39973
GO:0034101	erythrocyte homeostasis	biological_process	biological regulation	9	1064	71	14236	0.00845865	0.0813265	0.39973
GO:0035066	positive regulation of histone acetylation	biological_process	biological regulation	3	1064	14	14236	0.00281955	0.0815644	0.39973
GO:0042149	cellular response to glucose starvation	biological_process	cellular process	3	1064	14	14236	0.00281955	0.0815644	0.39973
GO:0042832	defense response to protozoan	biological_process	multi-organism process	3	1064	14	14236	0.00281955	0.0815644	0.39973
GO:0043954	cellular component maintenance	biological_process	cellular component organization or biogenesis	3	1064	14	14236	0.00281955	0.0815644	0.39973
GO:0045086	positive regulation of interleukin-2 biosynthetic process	biological_process	biological regulation	3	1064	14	14236	0.00281955	0.0815644	0.39973
GO:0046337	phosphatidylethanolamine metabolic process	biological_process	cellular process	3	1064	14	14236	0.00281955	0.0815644	0.39973
GO:0050651	dermatan sulfate proteoglycan biosynthetic process	biological_process	cellular process	3	1064	14	14236	0.00281955	0.0815644	0.39973
GO:0050655	dermatan sulfate proteoglycan metabolic process	biological_process	cellular process	3	1064	14	14236	0.00281955	0.0815644	0.39973
GO:0051457	maintenance of protein location in nucleus	biological_process	biological regulation	3	1064	14	14236	0.00281955	0.0815644	0.39973
GO:0060841	venous blood vessel development	biological_process	multicellular organismal process	3	1064	14	14236	0.00281955	0.0815644	0.39973
GO:0072583	clathrin-dependent endocytosis	biological_process	localization	3	1064	14	14236	0.00281955	0.0815644	0.39973
GO:0090313	regulation of protein targeting to membrane	biological_process	biological regulation	3	1064	14	14236	0.00281955	0.0815644	0.39973
GO:1903533	regulation of protein targeting	biological_process	biological regulation	3	1064	14	14236	0.00281955	0.0815644	0.39973
GO:1905209	positive regulation of cardiocyte differentiation	biological_process	biological regulation	3	1064	14	14236	0.00281955	0.0815644	0.39973
GO:0016311	dephosphorylation	biological_process	cellular process	17	1064	158	14236	0.0159774	0.0818388	0.400832
GO:0046456	icosanoid biosynthetic process	biological_process	cellular process	6	1064	41	14236	0.0056391	0.0822695	0.402455
GO:0097006	regulation of plasma lipoprotein particle levels	biological_process	biological regulation	6	1064	41	14236	0.0056391	0.0822695	0.402455
GO:0022612	gland morphogenesis	biological_process	multicellular organismal process	12	1064	103	14236	0.0112782	0.0824285	0.402607
GO:0048639	positive regulation of developmental growth	biological_process	biological regulation	12	1064	103	14236	0.0112782	0.0824285	0.402607
GO:0070325	lipoprotein particle receptor binding	molecular_function	binding	4	1178	23	16131	0.00339559	0.0824993	0.402607
GO:0071889	14-3-3 protein binding	molecular_function	binding	4	1178	23	16131	0.00339559	0.0824993	0.402607
GO:0001838	embryonic epithelial tube formation	biological_process	multicellular organismal process	13	1064	114	14236	0.012218	0.0830896	0.404027
GO:0032088	negative regulation of NF-kappaB transcription factor activity	biological_process	biological regulation	8	1064	61	14236	0.0075188	0.0829926	0.404027
GO:0045669	positive regulation of osteoblast differentiation	biological_process	biological regulation	8	1064	61	14236	0.0075188	0.0829926	0.404027
GO:0048667	cell morphogenesis involved in neuron differentiation	biological_process	cellular component organization or biogenesis	44	1064	476	14236	0.0413534	0.0830333	0.404027
GO:0098542	defense response to other organism	biological_process	multi-organism process	28	1064	285	14236	0.0263158	0.0830215	0.404027
GO:1903510	mucopolysaccharide metabolic process	biological_process	metabolic process	13	1064	114	14236	0.012218	0.0830896	0.404027
GO:0033061	DNA recombinase mediator complex	cellular_component	macromolecular complex	2	1230	7	17330	0.00162602	0.0832429	0.404287
GO:0043203	axon hillock	cellular_component	cell	2	1230	7	17330	0.00162602	0.0832429	0.404287
GO:0014020	primary neural tube formation	biological_process	multicellular organismal process	10	1064	82	14236	0.0093985	0.0842789	0.408828
GO:0060993	kidney morphogenesis	biological_process	multicellular organismal process	10	1064	82	14236	0.0093985	0.0842789	0.408828
GO:0006323	DNA packaging	biological_process	cellular component organization or biogenesis	18	1064	170	14236	0.0169173	0.0845199	0.409752
GO:0045664	regulation of neuron differentiation	biological_process	biological regulation	32	1064	333	14236	0.0300752	0.0851105	0.412369
GO:0045017	glycerolipid biosynthetic process	biological_process	cellular process	22	1064	216	14236	0.0206767	0.0855113	0.414063
GO:0005768	endosome	cellular_component	cell	68	1230	812	17330	0.0552846	0.0858671	0.415537
GO:0007420	brain development	biological_process	multicellular organismal process	48	1064	526	14236	0.0451128	0.0860449	0.415901
GO:0030173	integral component of Golgi membrane	cellular_component	organelle part	7	1230	54	17330	0.00569106	0.0859938	0.415901
GO:0043550	regulation of lipid kinase activity	biological_process	biological regulation	5	1064	32	14236	0.00469925	0.0866886	0.418762
GO:0030276	clathrin binding	molecular_function	binding	8	1178	63	16131	0.00679117	0.0867502	0.41881
GO:0003836	beta-galactoside (CMP) alpha-2,3-sialyltransferase activity	molecular_function	catalytic activity	2	1178	7	16131	0.00169779	0.087511	0.419235
GO:0004630	phospholipase D activity	molecular_function	catalytic activity	2	1178	7	16131	0.00169779	0.087511	0.419235
GO:0005114	type II transforming growth factor beta receptor binding	molecular_function	binding	2	1178	7	16131	0.00169779	0.087511	0.419235
GO:0005138	interleukin-6 receptor binding	molecular_function	binding	2	1178	7	16131	0.00169779	0.087511	0.419235
GO:0005499	vitamin D binding	molecular_function	binding	2	1178	7	16131	0.00169779	0.087511	0.419235
GO:0006470	protein dephosphorylation	biological_process	cellular process	15	1064	137	14236	0.0140977	0.0871723	0.419235
GO:0008467	[heparan sulfate]-glucosamine 3-sulfotransferase 1 activity	molecular_function	catalytic activity	2	1178	7	16131	0.00169779	0.087511	0.419235
GO:0010769	regulation of cell morphogenesis involved in differentiation	biological_process	biological regulation	15	1064	137	14236	0.0140977	0.0871723	0.419235
GO:0032680	regulation of tumor necrosis factor production	biological_process	biological regulation	9	1064	72	14236	0.00845865	0.0871125	0.419235
GO:0035005	1-phosphatidylinositol-4-phosphate 3-kinase activity	molecular_function	catalytic activity	2	1178	7	16131	0.00169779	0.087511	0.419235
GO:0035014	phosphatidylinositol 3-kinase regulator activity	molecular_function	molecular function regulator	2	1178	7	16131	0.00169779	0.087511	0.419235
GO:0045159	myosin II binding	molecular_function	binding	2	1178	7	16131	0.00169779	0.087511	0.419235
GO:0051302	regulation of cell division	biological_process	biological regulation	9	1064	72	14236	0.00845865	0.0871125	0.419235
GO:0010718	positive regulation of epithelial to mesenchymal transition	biological_process	biological regulation	4	1064	23	14236	0.0037594	0.0881717	0.41967
GO:0030864	cortical actin cytoskeleton	cellular_component	organelle part	8	1230	65	17330	0.00650407	0.0880923	0.41967
GO:0034367	macromolecular complex remodeling	biological_process	cellular component organization or biogenesis	4	1064	23	14236	0.0037594	0.0881717	0.41967
GO:0034368	protein-lipid complex remodeling	biological_process	cellular component organization or biogenesis	4	1064	23	14236	0.0037594	0.0881717	0.41967
GO:0034369	plasma lipoprotein particle remodeling	biological_process	cellular component organization or biogenesis	4	1064	23	14236	0.0037594	0.0881717	0.41967
GO:0051385	response to mineralocorticoid	biological_process	response to stimulus	4	1064	23	14236	0.0037594	0.0881717	0.41967
GO:0060441	epithelial tube branching involved in lung morphogenesis	biological_process	multicellular organismal process	4	1064	23	14236	0.0037594	0.0881717	0.41967
GO:0060612	adipose tissue development	biological_process	multicellular organismal process	4	1064	23	14236	0.0037594	0.0881717	0.41967
GO:0090022	regulation of neutrophil chemotaxis	biological_process	biological regulation	4	1064	23	14236	0.0037594	0.0881717	0.41967
GO:0090596	sensory organ morphogenesis	biological_process	multicellular organismal process	24	1064	240	14236	0.0225564	0.0881537	0.41967
GO:2001242	regulation of intrinsic apoptotic signaling pathway	biological_process	biological regulation	4	1064	23	14236	0.0037594	0.0881717	0.41967
GO:0000012	single strand break repair	biological_process	cellular process	2	1064	7	14236	0.0018797	0.0911277	0.420163
GO:0001574	ganglioside biosynthetic process	biological_process	cellular process	2	1064	7	14236	0.0018797	0.0911277	0.420163
GO:0001776	leukocyte homeostasis	biological_process	biological regulation	7	1064	52	14236	0.00657895	0.0906671	0.420163
GO:0002826	negative regulation of T-helper 1 type immune response	biological_process	biological regulation	2	1064	7	14236	0.0018797	0.0911277	0.420163
GO:0002885	positive regulation of hypersensitivity	biological_process	biological regulation	2	1064	7	14236	0.0018797	0.0911277	0.420163
GO:0007183	SMAD protein complex assembly	biological_process	cellular component organization or biogenesis	2	1064	7	14236	0.0018797	0.0911277	0.420163
GO:0007216	G-protein coupled glutamate receptor signaling pathway	biological_process	biological regulation	2	1064	7	14236	0.0018797	0.0911277	0.420163
GO:0008063	Toll signaling pathway	biological_process	biological regulation	10	1064	83	14236	0.0093985	0.0897556	0.420163
GO:0008378	galactosyltransferase activity	molecular_function	catalytic activity	5	1178	33	16131	0.00424448	0.0891742	0.420163
GO:0009186	deoxyribonucleoside diphosphate metabolic process	biological_process	cellular process	2	1064	7	14236	0.0018797	0.0911277	0.420163
GO:0010761	fibroblast migration	biological_process	cellular process	2	1064	7	14236	0.0018797	0.0911277	0.420163
GO:0010801	negative regulation of peptidyl-threonine phosphorylation	biological_process	biological regulation	2	1064	7	14236	0.0018797	0.0911277	0.420163
GO:0010898	positive regulation of triglyceride catabolic process	biological_process	biological regulation	2	1064	7	14236	0.0018797	0.0911277	0.420163
GO:0010988	regulation of low-density lipoprotein particle clearance	biological_process	biological regulation	2	1064	7	14236	0.0018797	0.0911277	0.420163
GO:0019530	taurine metabolic process	biological_process	cellular process	2	1064	7	14236	0.0018797	0.0911277	0.420163
GO:0031573	intra-S DNA damage checkpoint	biological_process	biological regulation	2	1064	7	14236	0.0018797	0.0911277	0.420163
GO:0032460	negative regulation of protein oligomerization	biological_process	biological regulation	2	1064	7	14236	0.0018797	0.0911277	0.420163
GO:0032801	receptor catabolic process	biological_process	cellular process	2	1064	7	14236	0.0018797	0.0911277	0.420163
GO:0032928	regulation of superoxide anion generation	biological_process	biological regulation	2	1064	7	14236	0.0018797	0.0911277	0.420163
GO:0033690	positive regulation of osteoblast proliferation	biological_process	biological regulation	2	1064	7	14236	0.0018797	0.0911277	0.420163
GO:0034329	cell junction assembly	biological_process	cellular component organization or biogenesis	16	1064	149	14236	0.0150376	0.0905319	0.420163
GO:0035405	histone-threonine phosphorylation	biological_process	cellular component organization or biogenesis	2	1064	7	14236	0.0018797	0.0911277	0.420163
GO:0035690	cellular response to drug	biological_process	cellular process	6	1064	42	14236	0.0056391	0.0902293	0.420163
GO:0042661	regulation of mesodermal cell fate specification	biological_process	biological regulation	2	1064	7	14236	0.0018797	0.0911277	0.420163
GO:0043380	regulation of memory T cell differentiation	biological_process	biological regulation	2	1064	7	14236	0.0018797	0.0911277	0.420163
GO:0044557	relaxation of smooth muscle	biological_process	multicellular organismal process	2	1064	7	14236	0.0018797	0.0911277	0.420163
GO:0045348	positive regulation of MHC class II biosynthetic process	biological_process	biological regulation	2	1064	7	14236	0.0018797	0.0911277	0.420163
GO:0046475	glycerophospholipid catabolic process	biological_process	cellular process	2	1064	7	14236	0.0018797	0.0911277	0.420163
GO:0046628	positive regulation of insulin receptor signaling pathway	biological_process	biological regulation	2	1064	7	14236	0.0018797	0.0911277	0.420163
GO:0046637	regulation of alpha-beta T cell differentiation	biological_process	biological regulation	6	1064	42	14236	0.0056391	0.0902293	0.420163
GO:0046880	regulation of follicle-stimulating hormone secretion	biological_process	biological regulation	2	1064	7	14236	0.0018797	0.0911277	0.420163
GO:0048293	regulation of isotype switching to IgE isotypes	biological_process	biological regulation	2	1064	7	14236	0.0018797	0.0911277	0.420163
GO:0048570	notochord morphogenesis	biological_process	multicellular organismal process	2	1064	7	14236	0.0018797	0.0911277	0.420163
GO:0048671	negative regulation of collateral sprouting	biological_process	biological regulation	2	1064	7	14236	0.0018797	0.0911277	0.420163
GO:0050767	regulation of neurogenesis	biological_process	biological regulation	38	1064	407	14236	0.0357143	0.0907779	0.420163
GO:0051001	negative regulation of nitric-oxide synthase activity	biological_process	biological regulation	2	1064	7	14236	0.0018797	0.0911277	0.420163
GO:0051386	regulation of neurotrophin TRK receptor signaling pathway	biological_process	biological regulation	2	1064	7	14236	0.0018797	0.0911277	0.420163
GO:0060136	embryonic process involved in female pregnancy	biological_process	multi-organism process	2	1064	7	14236	0.0018797	0.0911277	0.420163
GO:0060462	lung lobe development	biological_process	multicellular organismal process	2	1064	7	14236	0.0018797	0.0911277	0.420163
GO:0060463	lung lobe morphogenesis	biological_process	multicellular organismal process	2	1064	7	14236	0.0018797	0.0911277	0.420163
GO:0060491	regulation of cell projection assembly	biological_process	biological regulation	8	1064	62	14236	0.0075188	0.0893825	0.420163
GO:0060710	chorio-allantoic fusion	biological_process	multicellular organismal process	2	1064	7	14236	0.0018797	0.0911277	0.420163
GO:0060986	endocrine hormone secretion	biological_process	biological regulation	2	1064	7	14236	0.0018797	0.0911277	0.420163
GO:0070001	aspartic-type peptidase activity	molecular_function	catalytic activity	5	1178	33	16131	0.00424448	0.0891742	0.420163
GO:0070166	enamel mineralization	biological_process	multicellular organismal process	2	1064	7	14236	0.0018797	0.0911277	0.420163
GO:0070474	positive regulation of uterine smooth muscle contraction	biological_process	biological regulation	2	1064	7	14236	0.0018797	0.0911277	0.420163
GO:0072172	mesonephric tubule formation	biological_process	multicellular organismal process	2	1064	7	14236	0.0018797	0.0911277	0.420163
GO:0090244	Wnt signaling pathway involved in somitogenesis	biological_process	biological regulation	2	1064	7	14236	0.0018797	0.0911277	0.420163
GO:1903524	positive regulation of blood circulation	biological_process	biological regulation	6	1064	42	14236	0.0056391	0.0902293	0.420163
GO:1905330	regulation of morphogenesis of an epithelium	biological_process	biological regulation	10	1064	83	14236	0.0093985	0.0897556	0.420163
GO:1905770	regulation of mesodermal cell differentiation	biological_process	biological regulation	2	1064	7	14236	0.0018797	0.0911277	0.420163
GO:1905902	regulation of mesoderm formation	biological_process	biological regulation	2	1064	7	14236	0.0018797	0.0911277	0.420163
GO:2000341	regulation of chemokine (C-X-C motif) ligand 2 production	biological_process	biological regulation	2	1064	7	14236	0.0018797	0.0911277	0.420163
GO:2000369	regulation of clathrin-dependent endocytosis	biological_process	biological regulation	2	1064	7	14236	0.0018797	0.0911277	0.420163
GO:2000482	regulation of interleukin-8 secretion	biological_process	biological regulation	2	1064	7	14236	0.0018797	0.0911277	0.420163
GO:0004115	3',5'-cyclic-AMP phosphodiesterase activity	molecular_function	catalytic activity	3	1178	15	16131	0.00254669	0.0914459	0.420433
GO:0005523	tropomyosin binding	molecular_function	binding	3	1178	15	16131	0.00254669	0.0914459	0.420433
GO:0031434	mitogen-activated protein kinase kinase binding	molecular_function	binding	3	1178	15	16131	0.00254669	0.0914459	0.420433
GO:0034483	heparan sulfate sulfotransferase activity	molecular_function	catalytic activity	3	1178	15	16131	0.00254669	0.0914459	0.420433
GO:0034976	response to endoplasmic reticulum stress	biological_process	cellular process	15	1064	138	14236	0.0140977	0.0914096	0.420433
GO:0002064	epithelial cell development	biological_process	cellular process	13	1064	116	14236	0.012218	0.0922894	0.42359
GO:0019887	protein kinase regulator activity	molecular_function	molecular function regulator	18	1178	176	16131	0.0152801	0.0922019	0.42359
GO:0031960	response to corticosteroid	biological_process	response to stimulus	13	1064	116	14236	0.012218	0.0922894	0.42359
GO:0017022	myosin binding	molecular_function	binding	8	1178	64	16131	0.00679117	0.0931444	0.426935
GO:0046649	lymphocyte activation	biological_process	cellular process	26	1064	265	14236	0.0244361	0.0931762	0.426935
GO:0050673	epithelial cell proliferation	biological_process	cell proliferation	9	1064	73	14236	0.00845865	0.093137	0.426935
GO:0048562	embryonic organ morphogenesis	biological_process	multicellular organismal process	27	1064	277	14236	0.0253759	0.0938911	0.429967
GO:1902903	regulation of supramolecular fiber organization	biological_process	biological regulation	19	1064	184	14236	0.0178571	0.0942066	0.431168
GO:0002888	positive regulation of myeloid leukocyte mediated immunity	biological_process	biological regulation	3	1064	15	14236	0.00281955	0.0965153	0.435033
GO:0005546	phosphatidylinositol-4,5-bisphosphate binding	molecular_function	binding	7	1178	54	16131	0.00594228	0.0965375	0.435033
GO:0007431	salivary gland development	biological_process	multicellular organismal process	5	1064	33	14236	0.00469925	0.0962064	0.435033
GO:0009070	serine family amino acid biosynthetic process	biological_process	cellular process	3	1064	15	14236	0.00281955	0.0965153	0.435033
GO:0010922	positive regulation of phosphatase activity	biological_process	biological regulation	3	1064	15	14236	0.00281955	0.0965153	0.435033
GO:0032897	negative regulation of viral transcription	biological_process	biological regulation	3	1064	15	14236	0.00281955	0.0965153	0.435033
GO:0032922	circadian regulation of gene expression	biological_process	biological regulation	3	1064	15	14236	0.00281955	0.0965153	0.435033
GO:0034504	protein localization to nucleus	biological_process	localization	14	1064	128	14236	0.0131579	0.0966084	0.435033
GO:0035455	response to interferon-alpha	biological_process	response to stimulus	3	1064	15	14236	0.00281955	0.0965153	0.435033
GO:0042089	cytokine biosynthetic process	biological_process	multicellular organismal process	3	1064	15	14236	0.00281955	0.0965153	0.435033
GO:0042108	positive regulation of cytokine biosynthetic process	biological_process	biological regulation	8	1064	63	14236	0.0075188	0.0960491	0.435033
GO:0042634	regulation of hair cycle	biological_process	biological regulation	3	1064	15	14236	0.00281955	0.0965153	0.435033
GO:0043243	positive regulation of protein complex disassembly	biological_process	biological regulation	3	1064	15	14236	0.00281955	0.0965153	0.435033
GO:0043277	apoptotic cell clearance	biological_process	localization	3	1064	15	14236	0.00281955	0.0965153	0.435033
GO:0043584	nose development	biological_process	multicellular organismal process	3	1064	15	14236	0.00281955	0.0965153	0.435033
GO:0045649	regulation of macrophage differentiation	biological_process	biological regulation	3	1064	15	14236	0.00281955	0.0965153	0.435033
GO:0045672	positive regulation of osteoclast differentiation	biological_process	biological regulation	3	1064	15	14236	0.00281955	0.0965153	0.435033
GO:0045723	positive regulation of fatty acid biosynthetic process	biological_process	biological regulation	3	1064	15	14236	0.00281955	0.0965153	0.435033
GO:0045992	negative regulation of embryonic development	biological_process	biological regulation	3	1064	15	14236	0.00281955	0.0965153	0.435033
GO:0060039	pericardium development	biological_process	multicellular organismal process	3	1064	15	14236	0.00281955	0.0965153	0.435033
GO:0060260	regulation of transcription initiation from RNA polymerase II promoter	biological_process	biological regulation	3	1064	15	14236	0.00281955	0.0965153	0.435033
GO:0061001	regulation of dendritic spine morphogenesis	biological_process	biological regulation	3	1064	15	14236	0.00281955	0.0965153	0.435033
GO:0071276	cellular response to cadmium ion	biological_process	cellular process	3	1064	15	14236	0.00281955	0.0965153	0.435033
GO:0071825	protein-lipid complex subunit organization	biological_process	cellular component organization or biogenesis	5	1064	33	14236	0.00469925	0.0962064	0.435033
GO:0072175	epithelial tube formation	biological_process	multicellular organismal process	14	1064	128	14236	0.0131579	0.0966084	0.435033
GO:0090178	regulation of establishment of planar polarity involved in neural tube closure	biological_process	biological regulation	3	1064	15	14236	0.00281955	0.0965153	0.435033
GO:1901522	positive regulation of transcription from RNA polymerase II promoter involved in cellular response to chemical stimulus	biological_process	biological regulation	3	1064	15	14236	0.00281955	0.0965153	0.435033
GO:2000380	regulation of mesoderm development	biological_process	biological regulation	3	1064	15	14236	0.00281955	0.0965153	0.435033
GO:2001244	positive regulation of intrinsic apoptotic signaling pathway	biological_process	biological regulation	3	1064	15	14236	0.00281955	0.0965153	0.435033
GO:0071219	cellular response to molecule of bacterial origin	biological_process	multi-organism process	11	1064	95	14236	0.0103383	0.0967007	0.435207
GO:0030522	intracellular receptor signaling pathway	biological_process	biological regulation	17	1064	162	14236	0.0159774	0.0975006	0.438336
GO:0046486	glycerolipid metabolic process	biological_process	cellular process	28	1064	290	14236	0.0263158	0.0975043	0.438336
GO:0016266	O-glycan processing	biological_process	cellular process	7	1064	53	14236	0.00657895	0.0980989	0.440276
GO:0043229	intracellular organelle	cellular_component	cell	847	1230	11638	17330	0.688618	0.0980346	0.440276
GO:1901879	regulation of protein depolymerization	biological_process	biological regulation	7	1064	53	14236	0.00657895	0.0980989	0.440276
GO:0001678	cellular glucose homeostasis	biological_process	biological regulation	6	1064	43	14236	0.0056391	0.0985911	0.440721
GO:0010171	body morphogenesis	biological_process	developmental process	6	1064	43	14236	0.0056391	0.0985911	0.440721
GO:0010464	regulation of mesenchymal cell proliferation	biological_process	biological regulation	6	1064	43	14236	0.0056391	0.0985911	0.440721
GO:0018108	peptidyl-tyrosine phosphorylation	biological_process	cellular process	6	1064	43	14236	0.0056391	0.0985911	0.440721
GO:0043542	endothelial cell migration	biological_process	cellular process	6	1064	43	14236	0.0056391	0.0985911	0.440721
GO:0045446	endothelial cell differentiation	biological_process	cellular process	6	1064	43	14236	0.0056391	0.0985911	0.440721
GO:0050994	regulation of lipid catabolic process	biological_process	biological regulation	6	1064	43	14236	0.0056391	0.0985911	0.440721
GO:1901981	phosphatidylinositol phosphate binding	molecular_function	binding	13	1178	120	16131	0.0110357	0.0986331	0.440721
GO:0002704	negative regulation of leukocyte mediated immunity	biological_process	biological regulation	4	1064	24	14236	0.0037594	0.0998509	0.442018
GO:0003401	axis elongation	biological_process	growth	4	1064	24	14236	0.0037594	0.0998509	0.442018
GO:0005720	nuclear heterochromatin	cellular_component	organelle part	5	1230	35	17330	0.00406504	0.0989905	0.442018
GO:0006464	cellular protein modification process	biological_process	cellular process	159	1064	1935	14236	0.149436	0.0994538	0.442018
GO:0010862	positive regulation of pathway-restricted SMAD protein phosphorylation	biological_process	biological regulation	4	1064	24	14236	0.0037594	0.0998509	0.442018
GO:0032535	regulation of cellular component size	biological_process	cellular component organization or biogenesis	20	1064	197	14236	0.018797	0.0998493	0.442018
GO:0032673	regulation of interleukin-4 production	biological_process	biological regulation	4	1064	24	14236	0.0037594	0.0998509	0.442018
GO:0034109	homotypic cell-cell adhesion	biological_process	biological adhesion	4	1064	24	14236	0.0037594	0.0998509	0.442018
GO:0036211	protein modification process	biological_process	metabolic process	159	1064	1935	14236	0.149436	0.0994538	0.442018
GO:0043030	regulation of macrophage activation	biological_process	biological regulation	4	1064	24	14236	0.0037594	0.0998509	0.442018
GO:0043536	positive regulation of blood vessel endothelial cell migration	biological_process	biological regulation	4	1064	24	14236	0.0037594	0.0998509	0.442018
GO:0050927	positive regulation of positive chemotaxis	biological_process	biological regulation	4	1064	24	14236	0.0037594	0.0998509	0.442018
GO:0060334	regulation of interferon-gamma-mediated signaling pathway	biological_process	biological regulation	4	1064	24	14236	0.0037594	0.0998509	0.442018
GO:0070306	lens fiber cell differentiation	biological_process	cellular process	4	1064	24	14236	0.0037594	0.0998509	0.442018
GO:0072595	maintenance of protein localization in organelle	biological_process	biological regulation	4	1064	24	14236	0.0037594	0.0998509	0.442018
GO:1902622	regulation of neutrophil migration	biological_process	biological regulation	4	1064	24	14236	0.0037594	0.0998509	0.442018
GO:1903555	regulation of tumor necrosis factor superfamily cytokine production	biological_process	biological regulation	9	1064	74	14236	0.00845865	0.0993989	0.442018
GO:0002020	protease binding	molecular_function	binding	12	1178	109	16131	0.0101868	0.10009	0.442662
GO:0080135	regulation of cellular response to stress	biological_process	biological regulation	27	1064	279	14236	0.0253759	0.100106	0.442662
GO:0016569	covalent chromatin modification	biological_process	cellular component organization or biogenesis	24	1064	244	14236	0.0225564	0.101272	0.447576
GO:0019217	regulation of fatty acid metabolic process	biological_process	biological regulation	10	1064	85	14236	0.0093985	0.101334	0.447606
GO:0090257	regulation of muscle system process	biological_process	biological regulation	13	1064	118	14236	0.012218	0.102094	0.450717
GO:0001841	neural tube formation	biological_process	multicellular organismal process	11	1064	96	14236	0.0103383	0.10226	0.451201
GO:0042129	regulation of T cell proliferation	biological_process	biological regulation	12	1064	107	14236	0.0112782	0.102449	0.45179
GO:0005874	microtubule	cellular_component	organelle part	35	1230	395	17330	0.0284553	0.102596	0.452192
GO:0002688	regulation of leukocyte chemotaxis	biological_process	biological regulation	8	1064	64	14236	0.0075188	0.10299	0.452944
GO:0010506	regulation of autophagy	biological_process	biological regulation	8	1064	64	14236	0.0075188	0.10299	0.452944
GO:0030279	negative regulation of ossification	biological_process	biological regulation	8	1064	64	14236	0.0075188	0.10299	0.452944
GO:0072078	nephron tubule morphogenesis	biological_process	multicellular organismal process	8	1064	64	14236	0.0075188	0.10299	0.452944
GO:0048545	response to steroid hormone	biological_process	response to stimulus	23	1064	233	14236	0.0216165	0.103818	0.456338
GO:0005080	protein kinase C binding	molecular_function	binding	7	1178	55	16131	0.00594228	0.104039	0.457062
GO:0001637	G-protein coupled chemoattractant receptor activity	molecular_function	signal transducer activity	4	1178	25	16131	0.00339559	0.105249	0.460875
GO:0001882	nucleoside binding	molecular_function	binding	35	1178	385	16131	0.0297114	0.105227	0.460875
GO:0004114	3',5'-cyclic-nucleotide phosphodiesterase activity	molecular_function	catalytic activity	4	1178	25	16131	0.00339559	0.105249	0.460875
GO:0004950	chemokine receptor activity	molecular_function	signal transducer activity	4	1178	25	16131	0.00339559	0.105249	0.460875
GO:0009952	anterior/posterior pattern specification	biological_process	multicellular organismal process	21	1064	210	14236	0.0197368	0.105163	0.460875
GO:0070412	R-SMAD binding	molecular_function	binding	4	1178	25	16131	0.00339559	0.105249	0.460875
GO:0002690	positive regulation of leukocyte chemotaxis	biological_process	biological regulation	7	1064	54	14236	0.00657895	0.105855	0.461428
GO:0005677	chromatin silencing complex	cellular_component	organelle part	2	1230	8	17330	0.00162602	0.105911	0.461428
GO:0010001	glial cell differentiation	biological_process	cellular process	14	1064	130	14236	0.0131579	0.106197	0.461428
GO:0021517	ventral spinal cord development	biological_process	multicellular organismal process	5	1064	34	14236	0.00469925	0.106229	0.461428
GO:0030282	bone mineralization	biological_process	multicellular organismal process	5	1064	34	14236	0.00469925	0.106229	0.461428
GO:0032434	regulation of proteasomal ubiquitin-dependent protein catabolic process	biological_process	biological regulation	7	1064	54	14236	0.00657895	0.105855	0.461428
GO:0032757	positive regulation of interleukin-8 production	biological_process	biological regulation	5	1064	34	14236	0.00469925	0.106229	0.461428
GO:0033643	host cell part	cellular_component	other organism	2	1230	8	17330	0.00162602	0.105911	0.461428
GO:0043124	negative regulation of I-kappaB kinase/NF-kappaB signaling	biological_process	biological regulation	5	1064	34	14236	0.00469925	0.106229	0.461428
GO:0045777	positive regulation of blood pressure	biological_process	biological regulation	5	1064	34	14236	0.00469925	0.106229	0.461428
GO:0046888	negative regulation of hormone secretion	biological_process	biological regulation	7	1064	54	14236	0.00657895	0.105855	0.461428
GO:0060323	head morphogenesis	biological_process	developmental process	5	1064	34	14236	0.00469925	0.106229	0.461428
GO:0060603	mammary gland duct morphogenesis	biological_process	multicellular organismal process	5	1064	34	14236	0.00469925	0.106229	0.461428
GO:0071479	cellular response to ionizing radiation	biological_process	cellular process	5	1064	34	14236	0.00469925	0.106229	0.461428
GO:1903522	regulation of blood circulation	biological_process	biological regulation	17	1064	164	14236	0.0159774	0.105992	0.461428
GO:0051222	positive regulation of protein transport	biological_process	biological regulation	22	1064	222	14236	0.0206767	0.1064	0.461923
GO:0019789	SUMO transferase activity	molecular_function	catalytic activity	3	1178	16	16131	0.00254669	0.106699	0.461984
GO:0023026	MHC class II protein complex binding	molecular_function	binding	3	1178	16	16131	0.00254669	0.106699	0.461984
GO:0030228	lipoprotein particle receptor activity	molecular_function	molecular transducer activity	3	1178	16	16131	0.00254669	0.106699	0.461984
GO:0034185	apolipoprotein binding	molecular_function	binding	3	1178	16	16131	0.00254669	0.106699	0.461984
GO:0050431	transforming growth factor beta binding	molecular_function	binding	3	1178	16	16131	0.00254669	0.106699	0.461984
GO:0051960	regulation of nervous system development	biological_process	biological regulation	42	1064	462	14236	0.0394737	0.107103	0.463483
GO:0001658	branching involved in ureteric bud morphogenesis	biological_process	multicellular organismal process	6	1064	44	14236	0.0056391	0.107348	0.463553
GO:0023061	signal release	biological_process	cellular process	13	1064	119	14236	0.012218	0.107223	0.463553
GO:0046889	positive regulation of lipid biosynthetic process	biological_process	biological regulation	6	1064	44	14236	0.0056391	0.107348	0.463553
GO:0050688	regulation of defense response to virus	biological_process	biological regulation	6	1064	44	14236	0.0056391	0.107348	0.463553
GO:0000151	ubiquitin ligase complex	cellular_component	cell	25	1230	271	17330	0.0203252	0.107427	0.463646
GO:0002757	immune response-activating signal transduction	biological_process	biological regulation	20	1064	199	14236	0.018797	0.107622	0.463995
GO:0010639	negative regulation of organelle organization	biological_process	biological regulation	20	1064	199	14236	0.018797	0.107622	0.463995
GO:0050920	regulation of chemotaxis	biological_process	biological regulation	12	1064	108	14236	0.0112782	0.10787	0.464568
GO:1901215	negative regulation of neuron death	biological_process	biological regulation	12	1064	108	14236	0.0112782	0.10787	0.464568
GO:0006606	protein import into nucleus	biological_process	localization	11	1064	97	14236	0.0103383	0.108003	0.464893
GO:0000096	sulfur amino acid metabolic process	biological_process	cellular process	6	1064	46	14236	0.0056391	0.12601	0.466363
GO:0000117	regulation of transcription involved in G2/M transition of mitotic cell cycle	biological_process	biological regulation	1	1064	2	14236	0.00093985	0.143899	0.466363
GO:0000308	cytoplasmic cyclin-dependent protein kinase holoenzyme complex	cellular_component	cell	1	1230	2	17330	0.000813008	0.136917	0.466363
GO:0000404	heteroduplex DNA loop binding	molecular_function	binding	1	1178	2	16131	0.000848896	0.140725	0.466363
GO:0000715	nucleotide-excision repair, DNA damage recognition	biological_process	cellular component organization or biogenesis	1	1064	2	14236	0.00093985	0.143899	0.466363
GO:0000792	heterochromatin	cellular_component	organelle part	8	1230	71	17330	0.00650407	0.129292	0.466363
GO:0001010	transcription factor activity, sequence-specific DNA binding transcription factor recruiting	molecular_function	transcription regulator activity	1	1178	2	16131	0.000848896	0.140725	0.466363
GO:0001056	RNA polymerase III activity	molecular_function	catalytic activity	3	1178	17	16131	0.00254669	0.122861	0.466363
GO:0001083	transcription factor activity, RNA polymerase II basal transcription factor binding	molecular_function	transcription regulator activity	1	1178	2	16131	0.000848896	0.140725	0.466363
GO:0001102	RNA polymerase II activating transcription factor binding	molecular_function	binding	5	1178	38	16131	0.00424448	0.140877	0.466363
GO:0001105	RNA polymerase II transcription coactivator activity	molecular_function	transcription regulator activity	5	1178	37	16131	0.00424448	0.129648	0.466363
GO:0001135	transcription factor activity, RNA polymerase II transcription factor recruiting	molecular_function	transcription regulator activity	1	1178	2	16131	0.000848896	0.140725	0.466363
GO:0001162	RNA polymerase II intronic transcription regulatory region sequence-specific DNA binding	molecular_function	binding	2	1178	8	16131	0.00169779	0.111193	0.466363
GO:0001165	RNA polymerase I upstream control element sequence-specific DNA binding	molecular_function	binding	1	1178	2	16131	0.000848896	0.140725	0.466363
GO:0001179	RNA polymerase I transcription factor binding	molecular_function	binding	1	1178	2	16131	0.000848896	0.140725	0.466363
GO:0001205	transcriptional activator activity, RNA polymerase II distal enhancer sequence-specific DNA binding	molecular_function	transcription regulator activity	4	1178	27	16131	0.00339559	0.130501	0.466363
GO:0001206	transcriptional repressor activity, RNA polymerase II distal enhancer sequence-specific binding	molecular_function	transcription regulator activity	2	1178	9	16131	0.00169779	0.136284	0.466363
GO:0001300	chronological cell aging	biological_process	cellular process	1	1064	2	14236	0.00093985	0.143899	0.466363
GO:0001522	pseudouridine synthesis	biological_process	cellular process	3	1064	17	14236	0.00281955	0.129363	0.466363
GO:0001667	ameboidal-type cell migration	biological_process	cellular process	14	1064	131	14236	0.0131579	0.111198	0.466363
GO:0001705	ectoderm formation	biological_process	multicellular organismal process	1	1064	2	14236	0.00093985	0.143899	0.466363
GO:0001735	prenylcysteine oxidase activity	molecular_function	catalytic activity	1	1178	2	16131	0.000848896	0.140725	0.466363
GO:0001810	regulation of type I hypersensitivity	biological_process	biological regulation	1	1064	2	14236	0.00093985	0.143899	0.466363
GO:0001812	positive regulation of type I hypersensitivity	biological_process	biological regulation	1	1064	2	14236	0.00093985	0.143899	0.466363
GO:0001822	kidney development	biological_process	multicellular organismal process	22	1064	229	14236	0.0206767	0.134512	0.466363
GO:0001829	trophectodermal cell differentiation	biological_process	cellular process	3	1064	17	14236	0.00281955	0.129363	0.466363
GO:0001847	opsonin receptor activity	molecular_function	signal transducer activity	1	1178	2	16131	0.000848896	0.140725	0.466363
GO:0001868	regulation of complement activation, lectin pathway	biological_process	biological regulation	1	1064	2	14236	0.00093985	0.143899	0.466363
GO:0001869	negative regulation of complement activation, lectin pathway	biological_process	biological regulation	1	1064	2	14236	0.00093985	0.143899	0.466363
GO:0001883	purine nucleoside binding	molecular_function	binding	34	1178	377	16131	0.0288625	0.117787	0.466363
GO:0001960	negative regulation of cytokine-mediated signaling pathway	biological_process	biological regulation	4	1064	27	14236	0.0037594	0.138781	0.466363
GO:0001974	blood vessel remodeling	biological_process	multicellular organismal process	5	1064	37	14236	0.00469925	0.13916	0.466363
GO:0001998	angiotensin-mediated vasoconstriction involved in regulation of systemic arterial blood pressure	biological_process	biological regulation	1	1064	2	14236	0.00093985	0.143899	0.466363
GO:0002040	sprouting angiogenesis	biological_process	multicellular organismal process	5	1064	37	14236	0.00469925	0.13916	0.466363
GO:0002263	cell activation involved in immune response	biological_process	cellular process	10	1064	89	14236	0.0093985	0.126961	0.466363
GO:0002266	follicular dendritic cell activation	biological_process	cellular process	1	1064	2	14236	0.00093985	0.143899	0.466363
GO:0002268	follicular dendritic cell differentiation	biological_process	cellular process	1	1064	2	14236	0.00093985	0.143899	0.466363
GO:0002281	macrophage activation involved in immune response	biological_process	cellular process	2	1064	9	14236	0.0018797	0.141604	0.466363
GO:0002283	neutrophil activation involved in immune response	biological_process	cellular process	2	1064	8	14236	0.0018797	0.11566	0.466363
GO:0002313	mature B cell differentiation involved in immune response	biological_process	cellular process	2	1064	8	14236	0.0018797	0.11566	0.466363
GO:0002315	marginal zone B cell differentiation	biological_process	cellular process	1	1064	2	14236	0.00093985	0.143899	0.466363
GO:0002366	leukocyte activation involved in immune response	biological_process	cellular process	10	1064	89	14236	0.0093985	0.126961	0.466363
GO:0002384	hepatic immune response	biological_process	response to stimulus	1	1064	2	14236	0.00093985	0.143899	0.466363
GO:0002430	complement receptor mediated signaling pathway	biological_process	biological regulation	1	1064	2	14236	0.00093985	0.143899	0.466363
GO:0002537	nitric oxide production involved in inflammatory response	biological_process	multicellular organismal process	1	1064	2	14236	0.00093985	0.143899	0.466363
GO:0002580	regulation of antigen processing and presentation of peptide or polysaccharide antigen via MHC class II	biological_process	biological regulation	1	1064	2	14236	0.00093985	0.143899	0.466363
GO:0002583	regulation of antigen processing and presentation of peptide antigen	biological_process	biological regulation	1	1064	2	14236	0.00093985	0.143899	0.466363
GO:0002585	positive regulation of antigen processing and presentation of peptide antigen	biological_process	biological regulation	1	1064	2	14236	0.00093985	0.143899	0.466363
GO:0002639	positive regulation of immunoglobulin production	biological_process	biological regulation	4	1064	26	14236	0.0037594	0.125192	0.466363
GO:0002741	positive regulation of cytokine secretion involved in immune response	biological_process	biological regulation	1	1064	2	14236	0.00093985	0.143899	0.466363
GO:0002866	positive regulation of acute inflammatory response to antigenic stimulus	biological_process	biological regulation	2	1064	8	14236	0.0018797	0.11566	0.466363
GO:0002883	regulation of hypersensitivity	biological_process	biological regulation	2	1064	9	14236	0.0018797	0.141604	0.466363
GO:0003156	regulation of animal organ formation	biological_process	biological regulation	5	1064	37	14236	0.00469925	0.13916	0.466363
GO:0003159	morphogenesis of an endothelium	biological_process	developmental process	2	1064	8	14236	0.0018797	0.11566	0.466363
GO:0003203	endocardial cushion morphogenesis	biological_process	multicellular organismal process	3	1064	16	14236	0.00281955	0.112479	0.466363
GO:0003215	cardiac right ventricle morphogenesis	biological_process	multicellular organismal process	3	1064	16	14236	0.00281955	0.112479	0.466363
GO:0003218	cardiac left ventricle formation	biological_process	multicellular organismal process	1	1064	2	14236	0.00093985	0.143899	0.466363
GO:0003278	apoptotic process involved in heart morphogenesis	biological_process	cellular process	1	1064	2	14236	0.00093985	0.143899	0.466363
GO:0003290	atrial septum secundum morphogenesis	biological_process	multicellular organismal process	1	1064	2	14236	0.00093985	0.143899	0.466363
GO:0003330	regulation of extracellular matrix constituent secretion	biological_process	biological regulation	1	1064	2	14236	0.00093985	0.143899	0.466363
GO:0003331	positive regulation of extracellular matrix constituent secretion	biological_process	biological regulation	1	1064	2	14236	0.00093985	0.143899	0.466363
GO:0003402	planar cell polarity pathway involved in axis elongation	biological_process	biological regulation	1	1064	2	14236	0.00093985	0.143899	0.466363
GO:0003835	beta-galactoside alpha-2,6-sialyltransferase activity	molecular_function	catalytic activity	1	1178	2	16131	0.000848896	0.140725	0.466363
GO:0003868	4-hydroxyphenylpyruvate dioxygenase activity	molecular_function	catalytic activity	1	1178	2	16131	0.000848896	0.140725	0.466363
GO:0003880	protein C-terminal carboxyl O-methyltransferase activity	molecular_function	catalytic activity	1	1178	2	16131	0.000848896	0.140725	0.466363
GO:0004008	copper-exporting ATPase activity	molecular_function	transporter activity	1	1178	2	16131	0.000848896	0.140725	0.466363
GO:0004053	arginase activity	molecular_function	catalytic activity	1	1178	2	16131	0.000848896	0.140725	0.466363
GO:0004112	cyclic-nucleotide phosphodiesterase activity	molecular_function	catalytic activity	4	1178	26	16131	0.00339559	0.117579	0.466363
GO:0004145	diamine N-acetyltransferase activity	molecular_function	catalytic activity	1	1178	2	16131	0.000848896	0.140725	0.466363
GO:0004157	dihydropyrimidinase activity	molecular_function	catalytic activity	1	1178	2	16131	0.000848896	0.140725	0.466363
GO:0004357	glutamate-cysteine ligase activity	molecular_function	catalytic activity	1	1178	2	16131	0.000848896	0.140725	0.466363
GO:0004392	heme oxygenase (decyclizing) activity	molecular_function	catalytic activity	1	1178	2	16131	0.000848896	0.140725	0.466363
GO:0004421	hydroxymethylglutaryl-CoA synthase activity	molecular_function	catalytic activity	1	1178	2	16131	0.000848896	0.140725	0.466363
GO:0004452	isopentenyl-diphosphate delta-isomerase activity	molecular_function	catalytic activity	1	1178	2	16131	0.000848896	0.140725	0.466363
GO:0004478	methionine adenosyltransferase activity	molecular_function	catalytic activity	1	1178	2	16131	0.000848896	0.140725	0.466363
GO:0004521	endoribonuclease activity	molecular_function	catalytic activity	7	1178	56	16131	0.00594228	0.111846	0.466363
GO:0004551	nucleotide diphosphatase activity	molecular_function	catalytic activity	2	1178	9	16131	0.00169779	0.136284	0.466363
GO:0004675	transmembrane receptor protein serine/threonine kinase activity	molecular_function	signal transducer activity	3	1178	17	16131	0.00254669	0.122861	0.466363
GO:0004721	phosphoprotein phosphatase activity	molecular_function	catalytic activity	18	1178	181	16131	0.0152801	0.112217	0.466363
GO:0004760	serine-pyruvate transaminase activity	molecular_function	catalytic activity	1	1178	2	16131	0.000848896	0.140725	0.466363
GO:0004798	thymidylate kinase activity	molecular_function	catalytic activity	1	1178	2	16131	0.000848896	0.140725	0.466363
GO:0004843	thiol-dependent ubiquitin-specific protease activity	molecular_function	catalytic activity	9	1178	78	16131	0.00764007	0.114345	0.466363
GO:0004850	uridine phosphorylase activity	molecular_function	catalytic activity	1	1178	2	16131	0.000848896	0.140725	0.466363
GO:0004874	aryl hydrocarbon receptor activity	molecular_function	signal transducer activity	1	1178	2	16131	0.000848896	0.140725	0.466363
GO:0004905	type I interferon receptor activity	molecular_function	signal transducer activity	1	1178	2	16131	0.000848896	0.140725	0.466363
GO:0004912	interleukin-3 receptor activity	molecular_function	signal transducer activity	1	1178	2	16131	0.000848896	0.140725	0.466363
GO:0004915	interleukin-6 receptor activity	molecular_function	signal transducer activity	1	1178	2	16131	0.000848896	0.140725	0.466363
GO:0004920	interleukin-10 receptor activity	molecular_function	signal transducer activity	1	1178	2	16131	0.000848896	0.140725	0.466363
GO:0005006	epidermal growth factor-activated receptor activity	molecular_function	signal transducer activity	1	1178	2	16131	0.000848896	0.140725	0.466363
GO:0005104	fibroblast growth factor receptor binding	molecular_function	binding	4	1178	28	16131	0.00339559	0.143979	0.466363
GO:0005146	leukemia inhibitory factor receptor binding	molecular_function	binding	1	1178	2	16131	0.000848896	0.140725	0.466363
GO:0005153	interleukin-8 receptor binding	molecular_function	binding	1	1178	2	16131	0.000848896	0.140725	0.466363
GO:0005355	glucose transmembrane transporter activity	molecular_function	transporter activity	3	1178	18	16131	0.00254669	0.139842	0.466363
GO:0005457	GDP-fucose transmembrane transporter activity	molecular_function	transporter activity	1	1178	2	16131	0.000848896	0.140725	0.466363
GO:0005525	GTP binding	molecular_function	binding	33	1178	371	16131	0.0280136	0.138322	0.466363
GO:0005666	DNA-directed RNA polymerase III complex	cellular_component	organelle part	3	1230	17	17330	0.00243902	0.115244	0.466363
GO:0005829	cytosol	cellular_component	cell	262	1230	3474	17330	0.213008	0.135209	0.466363
GO:0005938	cell cortex	cellular_component	cell	23	1230	251	17330	0.0186992	0.124803	0.466363
GO:0006227	dUDP biosynthetic process	biological_process	cellular process	1	1064	2	14236	0.00093985	0.143899	0.466363
GO:0006233	dTDP biosynthetic process	biological_process	cellular process	1	1064	2	14236	0.00093985	0.143899	0.466363
GO:0006333	chromatin assembly or disassembly	biological_process	cellular component organization or biogenesis	16	1064	155	14236	0.0150376	0.117267	0.466363
GO:0006481	C-terminal protein methylation	biological_process	cellular process	1	1064	2	14236	0.00093985	0.143899	0.466363
GO:0006656	phosphatidylcholine biosynthetic process	biological_process	cellular process	4	1064	26	14236	0.0037594	0.125192	0.466363
GO:0006760	folic acid-containing compound metabolic process	biological_process	cellular process	4	1064	27	14236	0.0037594	0.138781	0.466363
GO:0006788	heme oxidation	biological_process	cellular process	1	1064	2	14236	0.00093985	0.143899	0.466363
GO:0006796	phosphate-containing compound metabolic process	biological_process	cellular process	118	1064	1437	14236	0.110902	0.14299	0.466363
GO:0006907	pinocytosis	biological_process	localization	2	1064	8	14236	0.0018797	0.11566	0.466363
GO:0006909	phagocytosis	biological_process	localization	8	1064	66	14236	0.0075188	0.117684	0.466363
GO:0006940	regulation of smooth muscle contraction	biological_process	biological regulation	6	1064	47	14236	0.0056391	0.135893	0.466363
GO:0007172	signal complex assembly	biological_process	biological regulation	2	1064	8	14236	0.0018797	0.11566	0.466363
GO:0007175	negative regulation of epidermal growth factor-activated receptor activity	biological_process	biological regulation	2	1064	8	14236	0.0018797	0.11566	0.466363
GO:0007185	transmembrane receptor protein tyrosine phosphatase signaling pathway	biological_process	biological regulation	2	1064	9	14236	0.0018797	0.141604	0.466363
GO:0007199	G-protein coupled receptor signaling pathway coupled to cGMP nucleotide second messenger	biological_process	biological regulation	2	1064	8	14236	0.0018797	0.11566	0.466363
GO:0007206	phospholipase C-activating G-protein coupled glutamate receptor signaling pathway	biological_process	biological regulation	1	1064	2	14236	0.00093985	0.143899	0.466363
GO:0007296	vitellogenesis	biological_process	cellular component organization or biogenesis	1	1064	2	14236	0.00093985	0.143899	0.466363
GO:0007442	hindgut morphogenesis	biological_process	multicellular organismal process	2	1064	9	14236	0.0018797	0.141604	0.466363
GO:0007468	regulation of rhodopsin gene expression	biological_process	biological regulation	1	1064	2	14236	0.00093985	0.143899	0.466363
[truncated: 6,102 more rows]
